# Supplementary material
Source: PubMed Central journal article supplement (PMC2981442)

## Preparative and Mechanistic Studies Toward a Rational Development of Catalytic, Enantioselective Selenoetherification Reactions

Scott E. Denmark,\* Dipannita Kalyani and William R. Collins

*Roger Adams Laboratory, University of Illinois, 600 S Mathews Ave, Urbana, Illinois 61801*

### SUPPORTING INFORMATION

| <b>Table of Contents</b>                                                                   | <b>Page</b> |
|--------------------------------------------------------------------------------------------|-------------|
| General Experimental                                                                       | S2          |
| Literature Preparations                                                                    | S4          |
| Experimental Procedures                                                                    | S5          |
| Preparation of 1,2-Bis(2,6-bis-trifluoromethylphenyl)diselane                              | S5          |
| General Procedure 1. Preparation of Diols <b>24a-g</b>                                     | S6          |
| General Procedure 2. Preparation of Carbonates <b>25a-g</b>                                | S18         |
| General Procedure 3. Preparation of Racemic Seleno Ethers <b>28b-e</b> and <b>28g</b>      | S30         |
| Preparation of Enantioenriched Seleno Ether <b>28a</b> via <b>27</b>                       | S37         |
| Configurational Stability of <b>28a</b> toward Brønsted Acids (Table 1)                    | S41         |
| General Procedure 4. Configurational Stability of <b>28d-f</b> toward Brønsted Acids       | S43         |
| General Procedure 5. Carbonate Opening Experiments (Table 2)                               | S46         |
| Olefin Transfer Experiments                                                                | S53         |
| Preparation of Electrophile <b>34</b> via <b>33</b>                                        | S56         |
| Catalytic Selenoetherification with <b>6</b> and HMPA(S)                                   | S59         |
| General Procedure 6. Catalytic Selenoetherification with <b>34</b> and Achiral Lewis bases | S61         |
| General Procedure 7. Catalytic Selenoetherification with <b>34</b> and Chiral Lewis bases  | S61         |

|                                                                                                                |     |
|----------------------------------------------------------------------------------------------------------------|-----|
| <i>Denmark, Kalyani, and Collins</i>                                                                           | S2  |
| Catalytic Selenoetherification with <b>6</b> and ( <i>R</i> )- <b>35a</b>                                      | S63 |
| Preparation of Catalyst ( <i>R</i> )- <b>35m</b>                                                               | S64 |
| Optimization of Selenoetherification with ( <i>R</i> )- <b>35m</b> (Table 4)                                   | S66 |
| General Procedure 8. Asymmetric Selenoetherifications with ( <i>R</i> )- <b>35m</b> and <b>34</b> (Table 5)    | S68 |
| General Procedure 9. Isomerization Procedure for Seleno Ethers <b>37</b> , <b>38</b> , <b>40</b> and <b>41</b> | S80 |
| Mechanistic Studies                                                                                            | S82 |
| References                                                                                                     | S85 |
| NMR Spectra                                                                                                    | S86 |

## General Experimental

All reactions were performed in oven dried (140°C) glassware. Reaction solvents tetrahydrofuran (Fisher, HPLC grade), diethyl ether (Fisher, BHT stabilized ACS grade), and CH<sub>2</sub>Cl<sub>2</sub> (Fisher, unstabilized HPLC grade) were dried by passage through two columns of neutral alumina in a solvent dispensing system. Solvents for chromatography, filtration and recrystallization were CH<sub>2</sub>Cl<sub>2</sub> (Aldrich, ACS grade), ethyl acetate (Fisher, ACS grade), diethyl ether (Fisher, ACS grade), *tert*-butyl methyl ether (Aldrich, ACS grade) and hexane (Fisher, Optima) and were used as received. Triethylamine (Alfa-Aesar, 99%) and pyridine (Fisher) were freshly distilled over CaH<sub>2</sub>. Ethanol (Fisher, ACS grade) was distilled from magnesium. Acetic acid was distilled over CrO<sub>3</sub> and acetic anhydride prior to use. Diphenyl diselenide (Aldrich), allyl bromide (Aldrich), triphenylphosphine oxide recrystallized from ethanol (Acros), triphenylphosphine sulfide (Strem), hexamethylphosphorous triamide (Aldrich, distilled prior to use) carbonyl diimidazole (Aldrich), 4-dimethylaminopyridine (Aldrich), trifluoroacetic acid (Aldrich), methanesulfonic acid (Aldrich), sodium borohydride (Aldrich), methanesulfonyl

chloride (Aldrich), 4-toluenesulfonylchloride (Aldrich), 1,3-bistrifluoromethylbenzene (TCI America), *N*-chlorosuccinimide recrystallized from acetic acid (Aldrich), morpholine distilled over KOH (Aldrich), phosphorous trichloride (Aldrich, distilled prior to use), and sodium hydride washed with hexane (Aldrich) were obtained from commercial sources. “Brine” refers to a saturated solution of sodium chloride.

Melting points were obtained in vacuum-sealed capillary tubes and are corrected. Analytical thin-layer chromatography was performed on Merck silica gel plates with QF-254 indicator. Visualization was accomplished with UV (254), or potassium permanganate (KMnO<sub>4</sub>), or ceric ammonium molybdate (CAM). Column chromatography was performed using Merck silica 60 (40-63 μm particle size) gel purchased from Aldrich.

Analytical supercritical fluid chromatography was performed on a Berger Instruments SFC with spectrophotometric detector (220 nm) using Daicel Chiralpak OD, AD as well as a Regis Whelk-O1 column. Optical rotations were measured using a Jasco DIP-360 digital polarimeter in EtOH (ACS grade, distilled from magnesium) or Fischer ACS reagent grade CHCl<sub>3</sub> containing approximately 0.75% EtOH as a preservative and are reported as follows: concentration (*c* = g/dL), and solvent. <sup>1</sup>H NMR Spectra and <sup>13</sup>C NMR spectra were acquired in CDCl<sub>3</sub> at 500 MHz or 400 MHz and referenced to residual CHCl<sub>3</sub> at 7.26 and 77.00 ppm respectively. Assignments were obtained by reference to COSY, HMQC and HMBC correlations. Chemical shifts are reported in ppm, multiplicities are indicated by s (singlet), d (doublet), t (triplet), q (quartet), p (pentet), hex (hextet), hep (heptet), m (multiplet) and br (broad). Coupling constants, *J*, are reported in Hertz. Mass spectroscopy was performed by the University of Illinois Mass Spectrometer Center. EI mass spectra were performed on a 70-VSE instrument. ESI mass spectra were performed on a Waters Q-ToF Ultima instrument. Data are

reported in the form of (m/z) versus intensity. Infrared spectra (IR) were recorded on a Mattson Galaxy 5020 spectrophotometer in KBr pellets or NaCl cells (film). Peaks are reported in  $\text{cm}^{-1}$  with indicated relative intensities: s (strong, 67-100%); m (medium, 34-66%); w (weak, 0-33%). Elemental analyses were performed by the University of Illinois Microanalytical Service Laboratory and Robertson Microlit Laboratories, Inc. Melting points (mp) were determined on a Thomas-Hoover capillary melting point apparatus and are corrected.

### Literature Preparations

(*E*)-4-Phenyl-but-3-en-1-ol,<sup>1</sup> (*Z*)-4-phenyl-but-3-en-1-ol,<sup>2</sup> (*E*)-7-phenyl-hept-4-en-1-ol,<sup>3</sup> (*E*)-6-methyl-hept-4-en-1-ol,<sup>3</sup> *N*-phenylselenenylsuccinimide<sup>4</sup>, tris(dimethylamino) phosphine sulfide,<sup>5</sup> tris(dimethylamino) phosphine selenide,<sup>5</sup> tricyclohexylphosphine sulfide,<sup>6</sup> 1,3-dimethylhexahydropyrimidine-2-thione,<sup>7</sup> 1,2-bis(4-methoxyphenyl)diselane,<sup>8</sup> 1,2-bis(4-trifluoromethylphenyl)diselane,<sup>9</sup> 1,2-bis(2-trifluoromethylphenyl)diselane,<sup>9</sup> 1,2-bis(2-nitrophenyl)diselane,<sup>10</sup> 1,2-bis(2,4,6-triisopropylphenyl)diselane,<sup>11</sup> epoxy alcohol (**23**),<sup>12</sup> triol (**26**), using ((DHQ)<sub>2</sub>PHAL).<sup>13</sup> (*R*)-*N*<sup>2</sup>,*N*<sup>2'</sup>-dimethyl-[1,1'-binaphthalene]2,2'-diamine was synthesized via a known procedure from (*R*)-BINAM.<sup>14</sup>

**Preparation of 1,2-Bis(2,6-bis-trifluoromethylphenyl)diselane**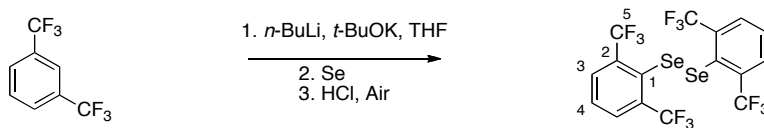

To an oven-dried, 100-mL, Schlenk flask equipped with a magnetic stir bar, was added potassium *tert*-butoxide (2.72 g, 24.7 mmol, 1.30 equiv), and THF (42 mL). The mixture was stirred for 5 min at room temperature and then the white suspension was cooled to  $-78\text{ }^{\circ}\text{C}$  (acetone/dry ice bath temperature). 2.31 M solution of *n*-Butyl lithium in hexanes (8.1 mL, 18.7 mmol, 1.00 equiv) was added followed by 1,3-bis-(trifluoromethyl) benzene (4.00 g, 18.7 mmol) whereupon the solution turned violet. The reaction was stirred at  $-78\text{ }^{\circ}\text{C}$  for 4 h after which Se (1.77 g, 22.4 mmol, 1.20 equiv) was added in one portion. The cold bath was removed and the solution was allowed to stir at room temperature for 14 h. 10% aq  $\text{H}_2\text{SO}_4$  (67 mL) was added slowly and then air was bubbled through the mixture for 4.5 h. The mixture was filtered through a 1-inch pad of silica and eluted with TBME (100 mL). The filtrate was transferred to a 250 mL separatory funnel and the organic and aqueous layers were separated. The organics were concentrated on the rotavap ( $30\text{ }^{\circ}\text{C}$ , 30 mm Hg) and the crude was filtered through a 1-inch pad of silica, which was eluted with TBME (100 mL) and the filtrate was concentrated on the rotavap ( $30\text{ }^{\circ}\text{C}$ , 30 mm Hg). This procedure was repeated once more after which the crude product was recrystallized from EtOH to afford 719 mg of 1,2-bis(2,6-bis-trifluoromethylphenyl)diselane (13 %) as a yellow solid.

Data for 1,2-bis(2,6-bis-trifluoromethylphenyl)diselane:

mp: 178-179  $^{\circ}\text{C}$

$^1\text{H NMR}$ : (400 MHz,  $\text{CDCl}_3$ )

7.90 (d,  $J = 7.6\text{ Hz}$ , 4 H, HC(3)), 7.62 (t,  $J = 8.0\text{ Hz}$ , 2 H, HC(4)).

$^{13}\text{C}$  NMR: (100 MHz,  $\text{CDCl}_3$ )

137.0 (q,  $J = 29.6$  Hz, C(2)), 130.3 (C(4)), 130.0 (q,  $J = 6.1$  Hz, C(3)), 126.9 (C(1)),  
122.9 (q,  $J = 274$  Hz, C(5)).

$^{77}\text{Se}$  NMR: (114 MHz,  $\text{CDCl}_3$ )

503 (br s)

IR: (thin film,  $\text{CH}_2\text{Cl}_2$ )

2920 (w), 2844 (w), 1582 (w), 1424 (w), 1333 (m), 1288 (s), 1204 (m), 1176 (s),  
1145 (m), 1115 (s), 1130 (s), 1064 (w), 1028 (w), 993 (w), 815 (m), 737 (m), 674  
(m), 572 (w), 508 (w).

MS: (EI, 70 eV)

585.8 (23.5,  $\text{M}^+$ ), 292.9 (100.0), 273.9 (90.6), 254.9 (18.2), 213.0 (30.6), 175.0  
(10.0), 163.0 (20.0), 144.0 (28.2), 125.0 (23.5), 75.0 (12.3).

HRMS: calcd for  $\text{C}_{16}\text{H}_{12}\text{Se}_2$ : 585.8608, found: 585.8608

## General Procedure 1. Synthesis of Diols

### Preparation of (3*R*,4*S*)-4-Phenyl-4-(phenylseleno)butane-1,3-diol (**24a**) (Scheme 10)

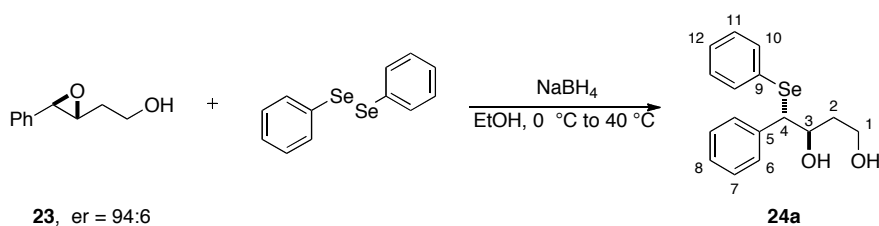

To an oven-dried, 10-mL, Schlenk flask equipped with a magnetic stir bar, was added diphenyl diselenide (234 mg, 0.75 mmol, 0.75 equiv), and sodium borohydride (56.7 mg, 1.50 mmol, 1.50 equiv). The flask was cooled to 0 °C (the ice bath temperature) and 2.5 mL of EtOH was added under an atmosphere of nitrogen. The solution was stirred at 0 °C for 0.5 h and then

the ice bath was removed. After 10 min of stirring at room temperature, a solution of the epoxy alcohol (**23**) (164 mg, 1.00 mmol) in EtOH (2.5 mL) was added and the resulting solution was heated to 40 °C (oil bath temperature) for 14 h. The reaction mixture was allowed to cool to room temperature and then was transferred to a 125-mL separatory funnel with an additional 10 mL of CH<sub>2</sub>Cl<sub>2</sub>. The mixture was extracted with a sat. aq. NaHCO<sub>3</sub> solution (1 x 20 mL) and the organic layer was separated. The aqueous layer was extracted with CH<sub>2</sub>Cl<sub>2</sub> (2 x 20 mL) and the combined organic extracts were washed with brine (1 x 25 mL) and dried over MgSO<sub>4</sub>. The solution was filtered and concentrated on the rotavap (30 °C, 30 mm Hg). The crude residue was purified by column chromatography (silica gel, 25 mm x 21.5 cm column, hexanes/EtOAc, 3/2) to afford 250 mg of **24a** (78%) as a white solid.

Data for **24a**:

mp: 47-48 °C

<sup>1</sup>H NMR: (500 MHz, CDCl<sub>3</sub>)

7.46 (d, *J* = 7.5 Hz, 2 H), 7.32-7.21 (m, 8H), 4.28 (d, *J* = 6.0 Hz, 1 H, HC(4)), 4.22-4.19 (m, 1 H, HC(3)), 3.76-3.74 (m, 2 H, H<sub>2</sub>C(1)), 3.00 (d, *J* = 1.5 Hz, 1 H, HOC(3)), 2.57 (t, *J* = 4.5 Hz, 1 H, HOC(1)), 1.89-1.87 (m, 1 H, HC(2)), 1.67-1.60 (m, 1 H, HC(2)).

<sup>13</sup>C NMR: (125 MHz, CDCl<sub>3</sub>)

138.6, 135.0, 129.1, 128.9, 128.8, 128.5, 128.1, 127.5, 73.0 (C(3)), 61.3 (C(1)), 55.7 (C(4)), 36.3 (C(2)).

IR: (NaCl plates, CH<sub>2</sub>Cl<sub>2</sub>)

3383 (s, br), 3058 (m), 3027 (m), 2946 (m), 2884 (m), 1951 (w), 1880 (w), 1807 (w), 1755 (w), 1600 (w), 1578 (m), 1494 (m), 1477 (s), 1452 (m), 1437 (s), 1328

(w), 1301 (w), 1266 (w), 1181 (w), 1156 (w), 1065 (s), 1052 (s), 1022 (m), 1000 (m), 988 (w), 966 (w), 897 (w), 844 (w), 740 (s), 700 (s), 670 (m), 618 (w), 554 (w), 522 (w), 507 (w)

MS: (EI, 70 eV)

322.0 (2.7, M<sup>+</sup>), 165.1 (44.9), 119.0 (12.5), 91.1 (100.0), 77.0 (10.3).

HRMS: calcd for C<sub>16</sub>H<sub>18</sub>O<sub>2</sub>Se: 322.0472, found: 322.0484

TLC: R<sub>f</sub> 0.18 (hexanes/EtOAc, 3/2) [UV]

Opt. Rot.: [α]<sub>D</sub><sup>24</sup> + 240.8 (c = 0.172, EtOH)

### Preparation of (3*R*,4*S*)-4-[(4-Methoxyphenyl)seleno]-4-phenylbutane-1,3-diol (**24b**)

#### (Scheme 10)

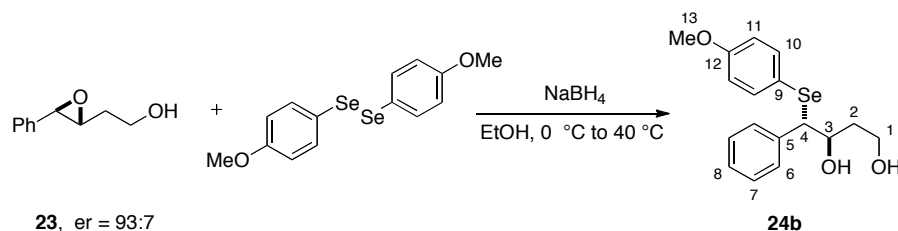

Following General Procedure 1, to an oven-dried, 10-mL, Schlenk flask equipped with a magnetic stir bar, was added 1,2-bis(4-methoxyphenyl)diselane (186 mg, 0.50 mmol, 0.50 equiv), and sodium borohydride (45.3 mg, 1.20 mmol, 1.20 equiv). The flask was cooled to 0 °C (the ice bath temperature) and 2.5 mL of EtOH was added under an atmosphere of nitrogen. The solution was stirred at 0 °C for 0.5 h and then the ice bath was removed. After 10 min of stirring at room temperature, a solution of the epoxy alcohol (**23**) (164 mg, 1.00 mmol) in EtOH (2.5 mL) was added and the resulting solution was heated to 40 °C (oil bath temperature) for 14 h. After workup, the crude residue was purified by column chromatography (silica gel, 25 mm x 21.5 cm column, hexanes/EtOAc, 1/1) to afford 175 mg of **24b** (50%) as a cream white solid.



Data for 24b:

mp: 62-63 °C

<sup>1</sup>H NMR: (500 MHz, CDCl<sub>3</sub>)

7.36 (d, *J* = 8.5 Hz, 2 H, HC(10)), 7.26-7.20 (m, 5 H, HC(6,7,8)), 6.75 (d, *J* = 9.0 Hz, 2 H, HC(11)), 4.19-4.14 (m, 2 H, HC(3,4)), 3.77 (s, 3 H, H<sub>3</sub>C(13)), 3.77-3.73 (m, 2 H, H<sub>2</sub>C(1)), 3.06 (br s, 1 H, HOC(3)), 2.69 (br s, 1 H, HOC(1)), 1.89-1.86 (m, 1 H, HC(2)), 1.67-1.60 (m, 1 H, HC(2)).

<sup>13</sup>C NMR: (125 MHz, CDCl<sub>3</sub>)

159.8, 138.7, 137.4, 128.8, 128.4, 127.3, 118.8 (C(9)), 114.6 (C(11)), 72.6 (C(3)), 61.2 (C(1)), 55.9 (C(4)), 55.1 (C(13)), 36.2 (C(2)).

IR: (NaCl plates, CH<sub>2</sub>Cl<sub>2</sub>)

3389 (w, br), 3060 (w), 3025 (w), 3000 (w), 2937 (w), 2836 (w), 1589 (m), 1571 (w), 1490 (s), 1461 (w), 1452 (m), 1440 (w), 1401 (w), 1285 (m), 1247 (s), 1174 (m), 1050 (m), 1029 (m), 1006 (w), 825 (m), 792 (w), 762 (w), 700 (m), 601 (w), 520 (w).

MS: (EI, 70 eV)

352.0 (6.6, M<sup>+</sup>), 190.0 (10.6), 188.0 (65.6), 187.0 (14.9), 186.0 (29.9), 185.0 (15.8), 184.0 (12.9), 135.1 (18.0), 108.1 (30.0), 107.1 (16.0), 91.1 (100.0), 79.1 (14.1), 77.0 (10.7).

HRMS: calcd for C<sub>17</sub>H<sub>20</sub>O<sub>3</sub>Se: 352.0578, found: 352.0578

TLC: *R<sub>f</sub>* 0.22 (hexanes/EtOAc, 1/1) [UV]

Opt. Rot.: [α]<sub>D</sub><sup>24</sup> + 222.2 (c = 0.96, EtOH)..

**Preparation of (3*R*,4*S*)-4-Phenyl-4-[[2,4,6-tri(propan-2-yl)phenyl]seleno]butane-1,3-diol (24c) (Scheme 10)**

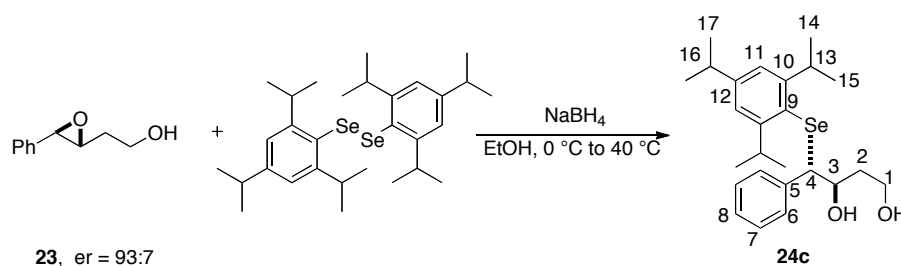

Following General Procedure 1, to an oven-dried, 10-mL, Schlenk flask equipped with a magnetic stir bar, was added 1,2-bis(2,4,6-triisopropylphenyl)diselane (423 mg, 0.75 mmol, 0.75 equiv), and sodium borohydride (56.7 mg, 1.50 mmol, 1.50 equiv). The flask was cooled to 0 °C (the ice bath temperature) and 2.5 mL of EtOH was added under an atmosphere of nitrogen. After 5 min the ice bath was removed and the solution was stirred at 25 °C for 45 min. A solution of the epoxy alcohol (**23**) (164 mg, 1.00 mmol) in EtOH (2.5 mL) was added and the resulting solution was heated to 40 °C (oil bath temperature) for 14 h. After workup the crude residue was purified by column chromatography (silica gel, 25 mm x 21.5 cm column, hexanes/EtOAc, 3/2) to afford 368 mg of **24c** (82%) as a white solid.

**Data for 24c:**

**mp:** 120-121 °C

**<sup>1</sup>H NMR:** (500 MHz, CDCl<sub>3</sub>)

7.26-7.19 (m, 5 H, HC(6,7,8)), 6.98 (s, 2 H, HC(11)), 4.26-4.23 (m, 1 H, HC(3)), 3.87 (d, *J* = 6.0 Hz, 1 H, HC(4)), 3.78-3.71 (m, 4 H, HC(1, 13)), 2.95 (br s, 1 H, HOC(3)), 2.88 (sept, *J* = 7.0 Hz, 1 H, HC(16)), 2.66 (t, *J* = 4.5 Hz, 1 H, HOC(1)), 1.89-1.87 (m, 1 H, HC(2)), 1.67-1.60 (m, 1 H, HC(2)), 1.26 (d, *J* = 7.0 Hz, 6 H),

1.21 (d,  $J = 6.5$  Hz, 6 H), 1.11 (d,  $J = 6.5$  Hz, 6 H).

$^{13}\text{C}$  NMR: (125 MHz,  $\text{CDCl}_3$ )

153.1, 149.9, 139.0, 128.5, 128.3, 127.2, 126.7, 121.7, 73.5 (C(3)), 61.4 (C(1)), 56.5 (C(4)), 36.4 (C(2)), 34.2, 34.1, 24.5, 24.4, 23.9, 23.8.

IR: ( $\text{NaCl}$  plates,  $\text{CH}_2\text{Cl}_2$ )

3353 (m, br), 3195 (w), 3060 (w), 3028 (w), 2960 (s), 2927 (m), 2868 (m), 1596 (w), 1560 (w), 1493 (w), 1461 (m), 1450 (w), 1421 (w), 1382 (w), 1361 (w), 1310 (w), 1152 (w), 1068 (m), 1054 (m), 1029 (w), 876 (w), 750 (w), 698 (m), 668 (w), 556 (w).

MS: (EI, 70 eV)

448.2 (4.6,  $\text{M}^+$ ), 286.1 (13.6), 285.1 (12.1), 284.1 (75.2), 282.1 (37.7), 281.1 (14.5), 280.1 (14.2), 203.2 (31.4), 119.1 (12.1), 117.1 (10.8), 91.1 (100.0).

HRMS: calcd for  $\text{C}_{25}\text{H}_{36}\text{O}_2\text{Se}$ : 448.1881, found: 448.1874

TLC:  $R_f$  0.36 (hexanes/EtOAc, 3/2) [UV]

Opt. Rot.:  $[\alpha]_D^{24} + 264.8$  ( $c = 0.18$ , EtOH)

### Preparation of (3*R*,4*S*)-4-Phenyl-4-[[4-(trifluoromethyl)phenyl]seleno]butane-1,3-diol (24d)

#### (Scheme 10)

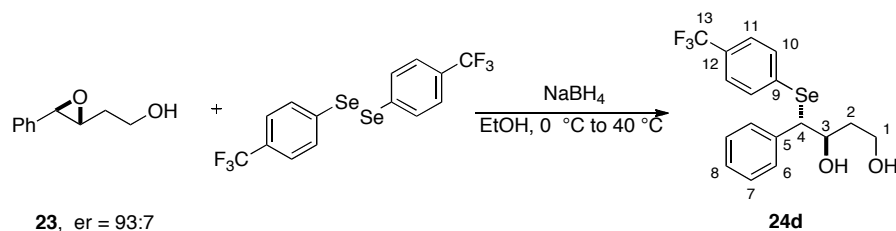

Following General Procedure 1, to an oven-dried, 10-mL, Schlenk flask equipped with a magnetic stir bar, was added 1,2-bis(4-trifluoromethylphenyl)diselane (336 mg, 0.75 mmol, 0.75

equiv), and sodium borohydride (56.7 mg, 1.50 mmol, 1.50 equiv). The flask was cooled to 0 °C (the ice bath temperature) and 2.5 mL of EtOH was added under an atmosphere of nitrogen. The solution was stirred at 0 °C for 0.5 h and then the ice bath was removed. After 10 min of stirring at room temperature, a solution of the epoxy alcohol (**23**) (164 mg, 1.00 mmol) in EtOH (2.5 mL) was added and the resulting solution was heated to 40 °C (oil bath temperature) for 14 h. After workup, the crude residue was purified by column chromatography (silica gel, 25 mm x 21.5 cm column, hexanes/EtOAc, 3/2) to afford 277 mg of **24d** (71%) as a white solid.

Data for **24d**:

mp: 63.5-64.5 °C

<sup>1</sup>H NMR: (500 MHz, CDCl<sub>3</sub>)

7.54 (d, *J* = 8.5 Hz, 2 H, HC(11)), 7.46 (d, *J* = 8.5 Hz, 2H, HC(10)), 7.37-7.25 (m, 5 H, HC(6,7,8)), 4.39 (d, *J* = 6.0 Hz, 1H, HC(4)), 4.33-4.29 (m, 1 H, HC(3)), 3.88-3.81 (m, 2H, H<sub>2</sub>C(1)), 2.83 (d, *J* = 3.0 Hz, 1 H, HOC(3)), 2.19 (t, *J* = 5.5 Hz, 1 H, HOC(1)), 1.95-1.89 (m, 1 H, HC(2)), 1.72-1.64 (m, 1 H, HC(2)).

<sup>13</sup>C NMR: (125 MHz, CDCl<sub>3</sub>)

138.6, 134.6, 134.4, 129.9 (q, *J* = 32 Hz, C(12)), 129.3, 128.8, 128.0, 125.9 (q, *J* = 3.6 Hz, C(11)), 124.2 (q, *J* = 270 Hz, C(13)), 73.6 (C(3)), 61.4 (C(1)), 55.9 (C(4)), 36.7 (C(2)).

<sup>19</sup>F NMR: (470 MHz, CDCl<sub>3</sub>)

-63.08 (s, CF<sub>3</sub>(13))

IR: (NaCl plates, CH<sub>2</sub>Cl<sub>2</sub>)

3371 (m, br), 3063 (w), 3028 (w), 2946 (w), 2886 (w), 1602 (m), 1494 (w), 1452 (w), 1397 (m), 1327 (s), 1165 (m), 1124 (s), 1102 (m), 1078 (s), 1057 (m), 1014

(m), 897 (w), 831 (w), 774 (w), 761 (w), 701 (m), 669 (w), 592 (w), 552 (w), 519 (w).

**MS:** (EI, 70 eV)

390.0 (2.0, M<sup>+</sup>), 373.0 (13.6), 235.1 (16.9), 225.1 (14.5), 166.1 (21.3), 165.1 (86.3), 147.1 (36.7), 145.0 (12.3), 129.1 (13.3), 120.1 (13.7), 119.0 (43.6), 117.1 (21.5), 115.1 (17.1), 105.1 (18.4), 92.0 (26.9), 91.1 (100.0), 77.0 (13.9), 65.1 (14.0) .

**HRMS:** calcd for C<sub>17</sub>H<sub>17</sub>F<sub>3</sub>O<sub>2</sub>Se: 390.0346, found: 390.0340

**TLC:** R<sub>f</sub> 0.19 (hexanes/EtOAc, 3/2) [UV]

**Opt. Rot.:** [α]<sub>D</sub><sup>24</sup> + 239.5 (c = 0.184, EtOH)

### Preparation of (3*R*,4*S*)-4-Phenyl-4-[[2-(trifluoromethyl)phenyl]seleno]butane-1,3-diol (**24e**)

#### (Scheme 10)

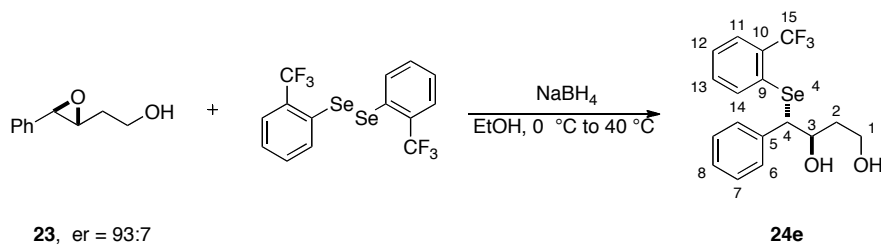

Following General Procedure 1, to an oven-dried, 10-mL, Schlenk flask equipped with a magnetic stir bar, was added 1,2-bis(2-trifluoromethylphenyl)diselane (336 mg, 0.75 mmol, 0.75 equiv), and sodium borohydride (56.7 mg, 1.50 mmol, 1.50 equiv). The flask was cooled to 0 °C (the ice bath temperature) and 2.5 mL of EtOH was added under an atmosphere of nitrogen. The solution was stirred at 0 °C for 0.5 h and then the ice bath was removed. After 10 min of stirring at room temperature, a solution of the epoxy alcohol (**23**) (164 mg, 1.00 mmol) in EtOH (2.5 mL) was added and the resulting solution was heated to 40 °C (oil bath temperature) for 14 h. After workup the crude residue was purified by column chromatography (silica gel, 25 mm x

21.5 cm column, hexanes/EtOAc, 1/1) to afford 289 mg of **24e** (74%) as a clear viscous oil.

Data for **24e**:

<sup>1</sup>H NMR: (500 MHz, CDCl<sub>3</sub>)

7.68 (d, *J* = 7.5 Hz, 1 H), 7.55 (d, *J* = 7.0 Hz, 1 H), 7.39-7.24 (m, 7 H), 4.41 (d, *J* = 5.5 Hz, 1 H, HC(4)), 4.25-4.21 (m, 1 H, HC(3)), 3.80-3.78 (m, 2 H, HC(1)), 2.94 (d, *J* = 2.5 Hz, 1 H, HOC(3)), 2.35 (t, *J* = 4.5 Hz, 1 H, HOC(1)), 1.86-1.81 (m, 1 H, HC(2)), 1.69-1.62 (m, 1 H, HC(2)).

<sup>13</sup>C NMR: (125 MHz, CDCl<sub>3</sub>)

137.9, 137.5, 132.8 (q, *J* = 29 Hz, C(10)), 131.9, 129.2, 128.5, 127.9, 127.8, 127.7, 126.8 (q, *J* = 5.5 Hz, C(11)), 123.7 (q, *J* = 272 Hz, C(15)), 73.1 (C(3)), 61.2 (C(1)), 56.5 (C(4)), 36.3 (C(2)).

<sup>19</sup>F NMR: (470 MHz, CDCl<sub>3</sub>)

-60.32 (s, CF<sub>3</sub>(15))

IR: (NaCl plates, CH<sub>2</sub>Cl<sub>2</sub>)

3371 (w, br), 3064 (w), 3028 (w), 2916 (w), 2879 (w), 1591 (w), 1571 (w), 1493 (w), 1468 (w), 1450 (w), 1434 (w), 1312 (w), 1259 (w), 1172 (m), 1127 (m), 1109 (m), 1088 (m), 1027 (m), 765 (m), 731 (w), 701 (m), 642 (w), 527 (w), 510 (w).

MS: (ESI)

413.0 (71.4, M+Na<sup>+</sup>), 397.1 (17.1), 373.0 (70.2), 355.0 (55.9), 282.3 (100.0), 165.1 (15.4), 147.1 (31.4), 129.1 (18.3).

HRMS: calcd for C<sub>17</sub>H<sub>17</sub>F<sub>3</sub>O<sub>2</sub>SeNa: 413.0247, found: 413.0244

TLC: *R*<sub>f</sub> 0.32 (hexanes/EtOAc, 1/1) [UV]

Opt. Rot.: [α]<sub>D</sub><sup>24</sup> + 237.3 (c = 0.18, EtOH)

**Preparation of (3*R*,4*S*)-4-[(2-Nitrophenyl)seleno]-4-phenylbutane-1,3-diol (**24f**) (Scheme 10)**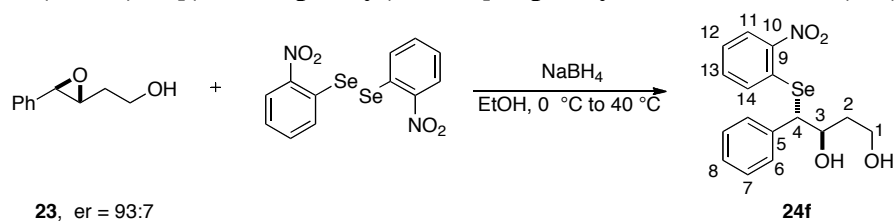

Following General Procedure 1, to an oven-dried, 10-mL, Schlenk flask equipped with a magnetic stir bar was added 1,2-bis(2-nitrophenyl)diselane (218 mg, 0.54 mmol, 0.62 equiv), and sodium borohydride (49.0 mg, 1.29 mmol, 1.50 equiv). The flask was cooled to 0 °C (the ice bath temperature) and 2.3 mL of EtOH was added under an atmosphere of nitrogen. The solution was stirred at 0 °C for 0.5 h and then the ice bath was removed. After 10 min of stirring at room temperature, a solution of the epoxy alcohol (**23**) (142 mg, 1.00 mmol) in EtOH (2.0 mL) was added and the resulting solution was heated to 40 °C (oil bath temperature) for 16 h. After workup the crude residue was purified by column chromatography (silica gel, 25 mm x 28 cm column, TBME/hexanes, 7/3) to afford 268 mg of **24f** (85%) as a yellow solid.

**Data for **24f**:**

**mp:** 49-51 °C

**<sup>1</sup>H NMR:** (500 MHz, CDCl<sub>3</sub>)

8.16 (d, *J* = 8.5 Hz, 1 H, HC(11)), 7.55-7.51 (m, 3H), 7.39 (t, *J* = 7.2 Hz, 1 H), 7.33 (t, *J* = 7.0 Hz, 2 H), 7.28-7.25 (m, 2 H), 4.53 (d, *J* = 4.5 Hz, 1 H, HC(4)), 4.38 (br s, 1 H, HC(1)), 3.80 (br s, 2 H, HC(1)), 3.06 (d, *J* = 3.0 Hz, 1 H, HOC(3)), 2.41 (s br, 1 H, HOC(1)), 1.89-1.86 (m, 1 H, HC(2)), 1.69-1.62 (m, 1 H, HC(2)).

**<sup>13</sup>C NMR:** (125 MHz, CDCl<sub>3</sub>)

147.5, 137.7, 133.4, 131.7, 130.6, 129.5, 128.8, 127.9, 126.1, 126.0, 73.7 (C(3)), 61.2 (C(1)), 53.6 (C(4)), 36.5 (C(2)).

**IR:** (NaCl plates, CH<sub>2</sub>Cl<sub>2</sub>)

3340 (m, br), 2950 (w), 1589 (m), 1565 (w), 1510 (s), 1451 (m), 1329 (s), 1303 (s), 1253 (w), 1096 (w), 1053 (m), 1036 (m), 852 (w), 752 (w), 728 (m), 702 (s), 667 (w), 645 (w), 553 (w), 506 (w).

**MS:** (ESI)

390.0 (100, M + Na<sup>+</sup>), 201.9 (12.9).

**HRMS:** calcd for C<sub>16</sub>H<sub>17</sub>NO<sub>4</sub>SeNa: 390.0220, found: 390.0224

**TLC:** R<sub>f</sub> 0.14 (TBME/hexanes, 7/3) [UV]

**Opt. Rot.:** [α]<sub>D</sub><sup>24</sup> + 173.8 (c = 0.355, CHCl<sub>3</sub>)

**Preparation of (3*R*,4*S*)-4-[[2,6-Bis(trifluoromethyl)phenyl]seleno]-4-phenylbutane-1,3-diol (24g) (Scheme 10)**

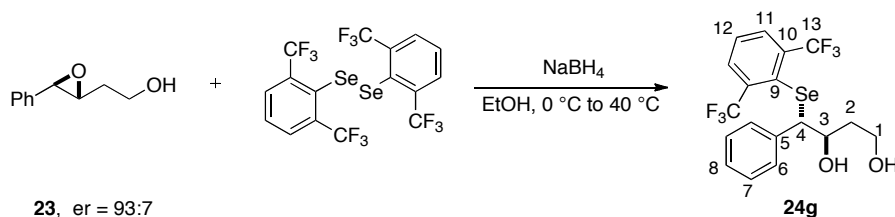

Following General Procedure 1, to an oven-dried, 10-mL, Schlenk flask equipped with a magnetic stir bar, was added 1,2-bis(2,6-bis-trifluoromethylphenyl)diselane (438 mg, 0.75 mmol, 0.75 equiv), and sodium borohydride (56.7 mg, 1.50 mmol, 1.50 equiv). The flask was cooled to 0 °C (the ice bath temperature) and 2.5 mL of EtOH was added under an atmosphere of nitrogen. The solution was stirred at 0 °C for 0.5 h and then the ice bath was removed. After 10 min of stirring at room temperature, a solution of the epoxy alcohol (**23**) (164 mg, 1.00 mmol) in EtOH (2.5 mL) was added and the resulting solution was heated to 40 °C (oil bath temperature) for 13 h. After workup the crude residue was purified by column chromatography (silica gel, 25 mm x



26.5 cm column, hexanes/EtOAc, 3/2) to afford 380 mg of **24g** (82%) as a white solid.

Data for 24g:

mp: 127-128 °C

<sup>1</sup>H NMR: (500 MHz, CDCl<sub>3</sub>)

7.91 (d,  $J = 8.0$  Hz, 2 H, HC(11)), 7.58 (t,  $J = 8.0$  Hz, 1 H, HC(12)), 7.28-7.20 (m, 5 H, HC(6,7,8)), 4.37 (d,  $J = 5.0$  Hz, 1 H, HC(4)), 4.28-4.25 (m, 1 H, HC(3)), 3.72-3.69 (m, 2 H, HC(1)), 3.10 (s br, 1 H, HOC(3)), 2.48 (t,  $J = 5.5$  Hz, 1 H, HOC(1)), 1.60-1.47 (m, 2 H, HC(2)).

<sup>13</sup>C NMR: (125 MHz, CDCl<sub>3</sub>)

137.4 (q,  $J = 29$  Hz, C(10)), 137.3, 130.5 (q,  $J = 6.4$  Hz, C(11)), 129.5, 128.9, 128.3, 127.7, 126.4, 123.2 (q,  $J = 274$  Hz, C(13)), 72.9 (C(3)), 61.1 (C(1)), 58.4 (C(4)), 36.5 (C(2)).

<sup>19</sup>F NMR: (470 MHz, CDCl<sub>3</sub>)

-58.27 (s, CF<sub>3</sub>(13))

IR: (NaCl plates, CH<sub>2</sub>Cl<sub>2</sub>)

3382 (w, br), 3030 (w), 2957 (w), 2929 (w), 2887 (w), 1580 (w), 1494 (w), 1454 (w), 1422 (w), 1332 (m), 1288 (s), 1199 (m), 1184 (m), 1159 (s), 1138 (s), 1116 (m), 1065 (m), 994 (w), 899 (w), 815 (m), 767 (w), 737 (w), 702(m), 675 (m), 654 (w).

MS: (ESI)

481.0 (100, M + Na<sup>+</sup>), 479.0 (50), 465.0 (34), 463.0 (16), 441.0 (81), 439.0 (42), 423.0 (11), 411.0 (15), 165.1 (14), 147.1 (37), 129.1 (32).

HRMS: calcd for C<sub>18</sub>H<sub>16</sub>F<sub>6</sub>O<sub>2</sub>SeNa: 481.0117, found: 481.0123

TLC:  $R_f$  0.35 (hexanes/EtOAc, 3/2) [UV]

Opt. Rot.:  $[\alpha]_D^{24} + 295.4$  ( $c = 0.186$ , EtOH)

## General Procedure 2. Synthesis of Carbonates.

### Preparation of (4*R*)-4-[(*S*)-Phenyl(phenylseleno)methyl]-1,3-dioxan-2-one (**25a**) (Scheme 10)

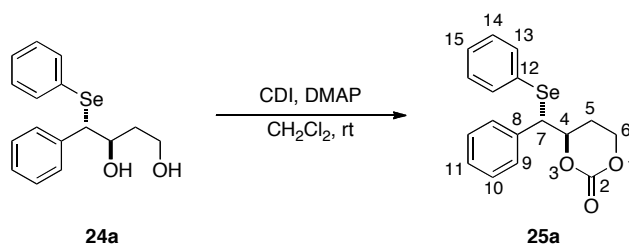

To an oven-dried, 10-mL, Schlenk flask equipped with a magnetic stir bar, was added diol **24a** (149 mg, 0.465 mmol), and dry CH<sub>2</sub>Cl<sub>2</sub> (2.3 mL). A solution of carbonyl diimidazole (113 mg, 0.698 mmol, 1.50 equiv) and 4-dimethylaminopyridine (14.2 mg, 0.116 mmol, 0.25 equiv) in CH<sub>2</sub>Cl<sub>2</sub> (2.3 mL) was added under an atmosphere of nitrogen. The resulting solution was stirred at room temperature for 19 h. The reaction mixture was transferred to a 125-mL separatory funnel with an additional 10 mL of CH<sub>2</sub>Cl<sub>2</sub>. The mixture was washed with H<sub>2</sub>O (1 x 20 mL) and the organic layer was separated. The aqueous layer was extracted with CH<sub>2</sub>Cl<sub>2</sub> (2 x 20 mL) and the combined organic extracts were washed with brine (1 x 25 mL) and dried over MgSO<sub>4</sub>. The solution was filtered and concentrated on the rotavap (30 °C, 30 mm Hg). The crude residue was purified by column chromatography (silica gel, 25 mm x 21.5 cm column, hexanes/EtOAc, 3/2) to afford 103 mg of carbonate **25a** (64%) as a white solid.

Data for **25a**:

mp: 120.5-121.5 °C

<sup>1</sup>H NMR: (500 MHz, CDCl<sub>3</sub>)

7.47 (dd,  $J = 8.0, 1.0$  Hz, 2 H), 7.33-7.24 (m, 8 H), 4.93 (ddd,  $J = 10.5, 6.5, 3.5$  Hz, 1 H, HC(4)), 4.38-4.32 (m, 3 H, HC(6,7)), 2.31-2.26 (m, 1 H, HC(5)), 1.99-1.90 (m, 1 H, HC(5)).

<sup>13</sup>C NMR: (125 MHz, CDCl<sub>3</sub>)

148.2 (C(2)), 137.4, 135.3, 129.2, 128.7, 128.6, 128.5, 128.4, 127.9, 80.9 (C(4)), 66.5 (C(6)), 51.8 (C(7)), 26.2 (C(5)).

IR: (NaCl plates, CH<sub>2</sub>Cl<sub>2</sub>)

3057 (w), 3021 (w), 2916 (w), 2851 (w), 1744 (m), 1578 (w), 1492 (w), 1476 (w), 1450 (w), 1436 (w), 1403 (w), 1248 (w), 1227 (w), 1116 (m), 1021 (w), 996 (w), 763 (w), 742 (w), 692 (w), 560 (w), 542 (w).

MS: (EI, 70 eV)

348.0 (5.1, M<sup>+</sup>), 304.0 (13.3), 198.0 (12.2), 156.9 (14.3), 147.1 (42.7), 146.1 (53.9), 118.1 (17.4), 117.1 (73.0), 115.0 (26.8), 105.0 (38.5), 91.1 (100.0), 78.0 (17.8), 77.0 (32.3), 51.0 (12.0).

HRMS: calcd for C<sub>17</sub>H<sub>16</sub>O<sub>3</sub>Se: 348.0265, found: 348.0247

TLC:  $R_f$  0.49 (hexanes/EtOAc, 1/1) [UV]

Opt. Rot.:  $[\alpha]_D^{24} + 155.5$  (c = 0.164, CHCl<sub>3</sub>)

Analysis: C<sub>17</sub>H<sub>16</sub>O<sub>3</sub>Se (348.0265)

Calcd: C, 58.80; H, 4.64%

Found: C, 58.67; H, 4.73%

**Preparation of (4*R*)-4-[(*S*)-(4-Methoxyphenyl)seleno]phenylmethyl]-1,3-dioxan-2-one (25b)****(Scheme 10)**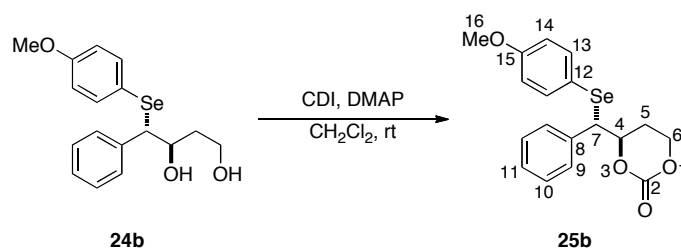

Following General Procedure 2, A solution of carbonyl diimidazole (83.0 mg, 0.511 mmol, 1.50 equiv) and 4-dimethylaminopyridine (10.4 mg, 0.085 mmol, 0.25 equiv) in  $\text{CH}_2\text{Cl}_2$  (1.7 mL) was added to a solution of diol **24b** (120 mg, 0.340 mmol) in  $\text{CH}_2\text{Cl}_2$  (1.7 mL) to yield after column chromatography (silica gel, 25 mm x 21.5 cm column, hexanes/EtOAc, 1/1) 75.8 mg of carbonate **25b** (59%) as a light yellow solid.

**Data for 25b:**

mp: 125-126 °C

$^1\text{H NMR}$ : (500 MHz,  $\text{CDCl}_3$ )

7.36 (d,  $J = 8.5$  Hz, 2H, HC(13)), 7.31-7.22 (m, 5H, HC(9,10,11)), 6.78 (d,  $J = 8.5$  Hz, 2H, HC(14)), 4.88 (ddd,  $J = 10.5, 6.5, 3.0$  Hz, 1 H, HC(4)), 4.39-4.32 (m, 2 H, HC(6)), 4.21 (d,  $J = 6.5$  Hz, 1 H, HC(7)), 3.80 (s, 3 H, HC(16)), 2.32-2.28 (m, 1 H, HC(5)), 1.99-1.91 (m, 1 H, HC(5)).

$^{13}\text{C NMR}$ : (125 MHz,  $\text{CDCl}_3$ )

160.1 (C(15)), 148.3 (C(2)), 137.7, 137.4, 128.6, 128.5, 127.7, 118.4 (C(12)), 114.8 (C(14)), 80.5 (C(4)), 66.5 (C(6)), 55.2 (C(16)), 51.9 (C(7)), 26.3 (C(5)).

IR: (NaCl plates,  $\text{CH}_2\text{Cl}_2$ )

3057 (w), 3028 (w), 2936 (w), 2907 (w), 28294 (w), 1747 (s), 1588 (w), 1490 (m), 1454 (w), 1405 (m), 1286 (w), 1247 (s), 1181 (m), 1118 (s), 1026 (w), 825 (w), 791

(w), 766 (w), 700 (w), 681 (w), 603 (w), 564 (w), 553 (w), 520 (w) 509 (m).

**MS:** (EI, 70 eV)

378.0 (3.5, M<sup>+</sup>), 334.0 (10.1), 226.0 (16.1), 188.0 (26.8), 187.0 (30.8), 186.0 (14.3), 185.0 (19.1), 184.0 (10.8), 171.9 (10.1), 148.1 (32.0), 147.1 (31.9), 146.1 (18.7), 145.1 (15.4), 131.1 (15.6), 130.1 (68.7), 129.1 (26.2), 118.1 (18.9), 117.1 (90.4), 116.1 (20.5), 115.1 (58.7), 108.1 (41.1), 105.0 (43.0), 93.1 (12.0), 92.0 (12.5), 91.1 (100.0), 85.9 (10.7), 84.0 (11.2), 78.1 (16.9), 77.0 (33.4), 65.1 (17.9), 63.1 (16.7), 57.1 (19.5), 55.1 (13.2), 51.0 (16.0)

**HRMS:** calcd for C<sub>18</sub>H<sub>18</sub>O<sub>4</sub>Se: 378.0370, found: 378.0363

**TLC:** R<sub>f</sub> 0.42 (hexanes/EtOAc, 1/1) [UV]

**Opt. Rot.:** [α]<sub>D</sub><sup>24</sup> + 154.2 (c = 0.156, CHCl<sub>3</sub>)

**Analysis:** C<sub>18</sub>H<sub>18</sub>O<sub>4</sub>Se (378.0370)

Calcd: C, 57.30; H, 4.81%

Found: C, 57.58; H, 4.91%

**Preparation of (4R)-4-[(S)-Phenyl[[2,4,6-tri(propan-2-yl)phenyl]seleno]methyl]-1,3-dioxan-2-one (25c) (Scheme 10)**

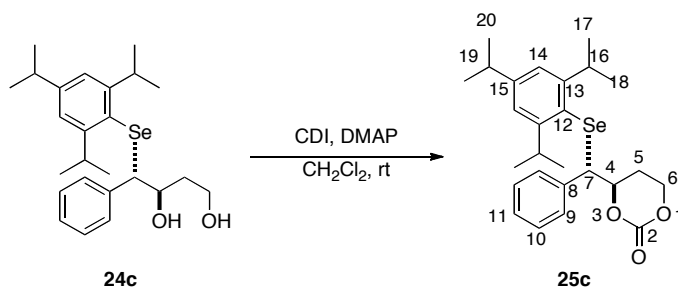

Following General Procedure 2, A solution of carbonyl diimidazole (145 mg, 0.897 mmol, 1.50 equiv) and 4-dimethylaminopyridine (18.3 mg, 0.149 mmol, 0.25 equiv) in CH<sub>2</sub>Cl<sub>2</sub>

(3.0 mL) was added to a solution of diol **24c** (268 mg, 0.598 mmol) in CH<sub>2</sub>Cl<sub>2</sub> (3.0 mL) to yield after column chromatography (silica gel, 25 mm x 21.5 cm column, hexanes/EtOAc, 65/35) 158 mg of carbonate **25c** (56%) as a white solid.

Data for 25c:

mp: 178-179 °C

<sup>1</sup>H NMR: (500 MHz, CDCl<sub>3</sub>)

7.30-7.23 (m, 5 H, HC(9,10,11)), 6.99 (s, 2 H, HC(14)), 4.85 (ddd, *J* = 11, 5.0, 1.5 Hz, 1 H, HC(4)), 4.33-4.31 (m, 2 H, HC(6)), 3.92 (d, *J* = 5.5 Hz, 1 H, HC(7)), 3.77 (sept, *J* = 7.0 Hz, 2 H, HC(16)), 2.89 (sept, *J* = 7.0 Hz, 1 H, HC(19)), 2.13-2.09 (m, 1 H, HC(5)), 1.91-1.82 (m, 1 H, HC(5)), 1.26 (d, *J* = 6.5 Hz, 6 H), 1.21 (d, *J* = 7.0 Hz, 6 H), 1.10 (d, *J* = 6.5 Hz, 6 H).

<sup>13</sup>C NMR: (125 MHz, CDCl<sub>3</sub>)

153.5, 150.4, 148.3, 137.2, 128.6, 128.5, 127.8, 126.5, 121.9, 80.5 (C(4)), 66.5 (C(6)), 52.0 (C(7)), 34.2, 34.1, 26.2 (C(5)), 24.6, 24.5, 23.9.

IR: (NaCl plates, CH<sub>2</sub>Cl<sub>2</sub>)

2960 (m), 2929 (w), 2865 (w), 1753 (s), 1595 (w), 1560 (w), 1492 (w), 1482 (w), 1461 (w), 1454 (w), 1404 (m), 1383 (w), 1362 (w), 1308 (w), 1248 (w), 1227 (w), 1181 (m), 1119 (s), 1057 (w), 940 (w), 879 (w), 766 (w), 748 (w), 700 (m), 560 (w).

MS: (EI, 70 eV)

474.2 (5.1, M<sup>+</sup>), 282.2 (43.7), 282.1 (31.4), 281.1 (12.0), 280.1 (14.0), 242.1 (26.4), 240.1 (14.6), 239.1 (12.2), 226.0 (16.1), 204.2 (14.8), 203.2 (90.1), 199.0 (18.4), 197.0 (22.5), 195.0 (10.9), 148.1 (15.2), 147.1 (100.0), 146.1 (27.0), 145.1 (16.1),

129.1 (15.1), 128.1 (10.3), 119.1 (12.6), 117.1 (45.5), 116.1 (10.2), 115.1 (21.1),  
105.1 (53.1), 91.1 (88.1), 77.1 (17.4), 57.2 (15.2).

**HRMS:** calcd for C<sub>26</sub>H<sub>34</sub>O<sub>3</sub>Se: 474.1673, found: 474.1682

**TLC:** R<sub>f</sub> 0.43 (hexanes/EtOAc, 65/35) [UV]

**Opt. Rot.:** [α]<sub>D</sub><sup>24</sup> + 216.6 (c = 0.178, CHCl<sub>3</sub>)

**Analysis:** C<sub>26</sub>H<sub>34</sub>O<sub>3</sub>Se (474.1673)

Calcd: C, 65.95; H, 7.24%

Found: C, 66.01; H, 7.44%

**Preparation of (4*R*)-4-[(*S*)-Phenyl[[4-(trifluoromethyl)phenyl]seleno]methyl]-1,3-dioxan-2-one (25d) (Scheme 10)**

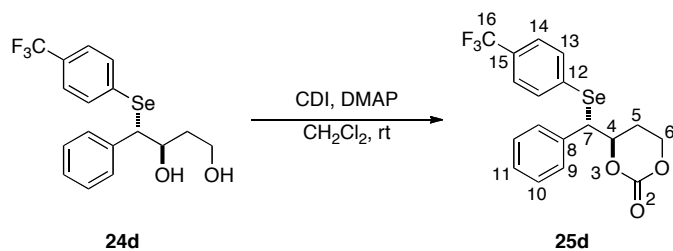

Following General Procedure 2, A solution of carbonyl diimidazole (109 mg, 0.674 mmol, 1.50 equiv) and 4-dimethylaminopyridine (13.7 mg, 0.112 mmol, 0.25 equiv) in CH<sub>2</sub>Cl<sub>2</sub> (2.2 mL) was added to a solution of diol **24d** (175 mg, 0.449 mmol) in CH<sub>2</sub>Cl<sub>2</sub> (2.2 mL) to yield after column chromatography (silica gel, 25 mm x 21.5 cm column, hexanes/EtOAc, 1/1) 130 mg of carbonate **25d** (70%) as a white solid.

**Data for 25d:**

**mp:** 112.5-113.5 °C

**<sup>1</sup>H NMR:** (500 MHz, CDCl<sub>3</sub>)

7.55 (d, *J* = 8.0 Hz, 2 H, HC(14)), 7.47 (d, *J* = 8.0 Hz, 2 H, HC(13)), 7.34-7.28 (m,

5 H, HC(9,10,11)), 4.95 (ddd,  $J = 11, 5.5, 3.5$  Hz, 1 H, HC(4)), 4.42 (d,  $J = 5.5$  Hz, 1 H, HC(7)), 4.36-4.34 (m, 2 H, HC(6)), 2.22-2.18 (m, 1 H, HC(5)), 1.97-1.88 (m, 1 H, HC(5)).

$^{13}\text{C}$  NMR: (125 MHz,  $\text{CDCl}_3$ )

148.1 (C(2)), 136.8, 134.6, 133.6, 130.20 (q,  $J = 32$  Hz, C(15)), 128.9, 128.8, 128.2, 125.82 (q,  $J = 3.6$  Hz, C(14)), 123.83 (q,  $J = 271$  Hz, C(16)), 80.9 (C(4)), 66.5 (C(6)), 51.9 (C(7)), 25.9 (C(5))

IR: (NaCl plates,  $\text{CH}_2\text{Cl}_2$ )

3063 (w), 3031 (w), 2979 (w), 2920 (w), 1750 (s), 1601 (m), 1496 (w), 1480 (w), 1454 (w), 1398 (m), 1327 (s), 1251 (m), 1229 (w), 1166 (s), 1121 (s), 1078 (s), 1057 (m), 1014 (m), 831 (w), 766 (w), 702 (m), 692 (w), 593 (w), 563 (w), 540 (w).

MS: (EI)

415.9 (2.4,  $\text{M}^+$ ), 372.0 (19.0), 265.9 (39.1), 263.9 (19.7), 225.9 (10.2), 224.9 (11.7), 197.0 (11.2), 185.0 (30.1), 148.1 (10.3), 147.1 (45.7), 146.1 (82.9), 145.0 (16.8), 127.0 (10.0), 117.0 (51.6), 116.0 (17.0), 115.0 (42.1), 105.0 (51.2), 77.0 (32.5), 65.1 (10.8), 57.1 (13.2), 51.01 (12.8)

HRMS: calcd for  $\text{C}_{18}\text{H}_{15}\text{F}_3\text{O}_3\text{Se}$ : 416.0139, found: 416.0124

TLC:  $R_f$  0.43 (hexanes/EtOAc, 1/1) [UV]

Opt. Rot.:  $[\alpha]_D^{24} + 178.8$  (c = 0.160,  $\text{CHCl}_3$ )

Analysis:  $\text{C}_{18}\text{H}_{15}\text{F}_3\text{O}_3\text{Se}$  (416.0139)

Calcd: C, 52.06; H, 3.64%

Found: C, 52.07; H, 3.58%



**Preparation of (4*R*)-4-[(*S*)-Phenyl[[2-(trifluoromethyl)phenyl]seleno]methyl]-1,3-dioxan-2-one (25e) (Scheme 10)**

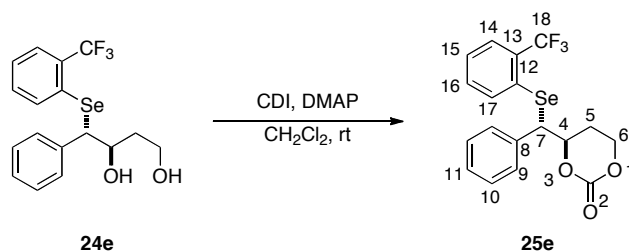

Following General Procedure 2, A solution of carbonyl diimidazole (142 mg, 0.877 mmol, 1.50 equiv) and 4-dimethylaminopyridine (17.9 mg, 0.146 mmol, 0.25 equiv) in  $\text{CH}_2\text{Cl}_2$  (2.9 mL) was added to a solution of diol **24e** (228 mg, 0.585 mmol) in  $\text{CH}_2\text{Cl}_2$  (2.9 mL) to yield after column chromatography (silica gel, 25 mm x 21.5 cm column, hexanes/EtOAc, 3/2) 148 mg of carbonate **25e** (61%) as a white solid.

Data for **25e**:

mp: 92-93 °C

$^1\text{H NMR}$ : (500 MHz,  $\text{CDCl}_3$ )

7.69 (d,  $J = 7.5$  Hz, 1 H, HC(14)), 7.48 (d,  $J = 7.5$  Hz, 1 H), 7.39 (t,  $J = 8.0$  Hz, 1 H), 7.32-7.23 (m, 6 H), 4.97-4.93 (m, 1 H, HC(4)), 4.41 (d,  $J = 6.0$  Hz, 1 H, HC(7)), 4.35-4.33 (m, 2 H, HC(6)), 2.22-2.18 (m, 1 H, HC(5)), 1.96-1.87 (m, 1 H, HC(5)).

$^{13}\text{C NMR}$ : (125 MHz,  $\text{CDCl}_3$ )

148.1 (C(2)), 138.3, 136.7, 133.0 (q,  $J = 29$  Hz, C(13)), 132.0, 128.9, 128.7, 128.4, 128.1, 127.0, 126.89 (q,  $J = 5.5$  Hz, C(14)), 123.65 (q,  $J = 272$  Hz, C(18)), 80.9 (C(4)), 66.5 (C(6)), 52.3 (C(7)), 25.9 (C(5))

$^{19}\text{F}$  NMR: (376 MHz,  $\text{CDCl}_3$ )

-60.15 ( $\text{CF}_3(13)$ )

IR: ( $\text{NaCl}$  plates,  $\text{CH}_2\text{Cl}_2$ )

3057 (w), 3028 (w), 2917 (w), 2851 (w), 1751 (s), 1590 (w), 1475 (w), 1437 (w),  
1405 (m), 1311 (s), 1252 (m), 1227 (w), 1173 (m), 1119 (s), 1088 (m), 1026 (m),  
957 (w), 765 (m), 730 (w), 701 (m), 682 (w), 642 (w), 564 (w), 527 (w).

MS: (EI, 70 eV)

416.0 (2.3,  $\text{M}^+$ ), 147.1 (29.4), 146.1 (16.8), 117.1 (27.4), 115.0 (19.4), 105.0 (20.3),  
91.0 (100.0), 77.0 (10.2).

HRMS: calcd for  $\text{C}_{18}\text{H}_{15}\text{F}_3\text{O}_3\text{Se}$ : 416.0139, found: 416.0125

TLC:  $R_f$  0.25 (hexanes/EtOAc, 3/2) [UV]

Opt. Rot.:  $[\alpha]_D^{24} + 167.6$  ( $c = 0.164$ ,  $\text{CHCl}_3$ )

Analysis:  $\text{C}_{18}\text{H}_{15}\text{F}_3\text{O}_3\text{Se}$  (416.0139)

Calcd: C, 52.06; H, 3.64%

Found: C, 51.82; H, 3.49%

### Preparation of (4R)-4-[(S)[(2-Nitrophenyl)seleno]phenylmethyl]-1,3-dioxan-2-one (25f)

#### (Scheme 10)

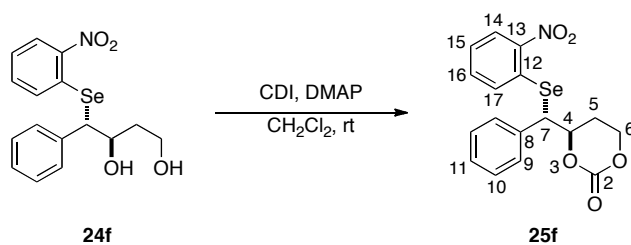

Following General Procedure 2, A solution of carbonyl diimidazole (206 mg, 1.27 mmol, 1.50 equiv) and 4-dimethylaminopyridine (25.8 mg, 0.211 mmol, 0.25 equiv) in  $\text{CH}_2\text{Cl}_2$  (4.2 mL)

was added to a solution of diol **24f** (310 mg, 0.850 mmol) in CH<sub>2</sub>Cl<sub>2</sub> (4.2 mL) to yield after column chromatography (silica gel, 25 mm x 21.5 cm column, hexanes/EtOAc, 1/1) 185 mg of carbonate **25f** (56%) as a yellow solid. The solid was further purified by recrystallization from CH<sub>2</sub>Cl<sub>2</sub>/hexanes to obtain analytically pure product.

Data for 25f:

mp: 159-160 °C

<sup>1</sup>H NMR: (500 MHz, CDCl<sub>3</sub>)

8.18 (d, *J* = 8.5 Hz, 1H, HC(14)), 7.56-7.51 (m, 3H), 7.44 (t, *J* = 7.0 Hz, 1H), 7.39-7.30 (m, 4H), 5.05-5.01 (m, 1 H, HC(4)), 4.64 (d, *J* = 4.5 Hz, 1 H, HC(7)), 4.37-4.35 (m, 2 H, HC(6)), 2.21-2.16 (d, *J* = 14.5 Hz, 1 H, HC(5)), 2.04-1.96 (m, 1 H, HC(5)).

<sup>13</sup>C NMR: (125 MHz, CDCl<sub>3</sub>)

147.9 (C(2)), 147.7, 136.3, 133.6, 130.7, 130.5, 129.3, 129.1, 128.4, 126.6, 126.1, 81.4 (C(4)), 66.5 (C(6)), 50.2 (C(7)), 25.7 (C(5))

IR: (NaCl plates, CH<sub>2</sub>Cl<sub>2</sub>)

3061 (w), 3028 (w), 2979 (w), 2916 (w), 1747 (s), 1589 (m), 1566 (w), 1512 (s), 1478 (w), 1451 (w), 1432 (w), 1405 (m), 1331 (s), 1305 (m), 1250 (m), 1228 (m), 1201 (m), 1184 (m), 1143 (m), 1117 (s), 1036 (w), 956 (w), 852 (w), 783 (w), 766 (w), 730 (m), 703 (m), 681 (w), 647 (w), 564 (w), 540.0 (w), 524 (w), 509 (w).

MS: (ESI)

416.0 (100.0, M + Na<sup>+</sup>), 414.0 (56.5), 390.0 (11.4), 372.0 (11.4).

HRMS: calcd for C<sub>17</sub>H<sub>15</sub>NO<sub>5</sub>SeNa: 416.0013, found: 416.0013

TLC: R<sub>f</sub> 0.18 (hexanes/EtOAc, 1/1) [UV]

Opt. Rot.:  $[\alpha]_D^{24} + 175.8$  ( $c = 0.405$ ,  $\text{CHCl}_3$ )

Analysis:  $\text{C}_{17}\text{H}_{15}\text{NO}_5\text{Se}$  (392.26)

Calcd: C, 52.05; H, 3.85; N, 3.57%

Found: C, 52.03; H, 3.59; N, 3.66%

**Preparation of (4*R*)-4-[(*S*)[2,6-Bis(trifluoromethyl)phenyl]seleno]phenylmethyl]-1,3-dioxan-2-one (25g) (Scheme 10)**

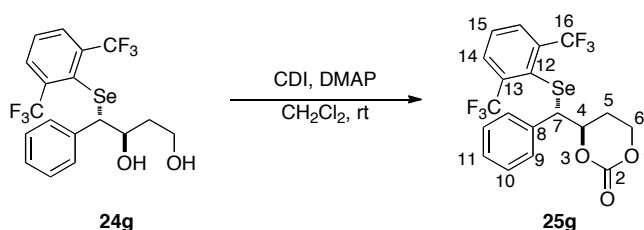

Following General Procedure 2, A solution of carbonyl diimidazole (121 mg, 0.749 mmol, 1.50 equiv) and 4-dimethylaminopyridine (15.2 mg, 0.125 mmol, 0.25 equiv) in  $\text{CH}_2\text{Cl}_2$  (2.5 mL) was added to a solution of diol **24g** (228 mg, 0.499 mmol) in  $\text{CH}_2\text{Cl}_2$  (2.5 mL) to yield after column chromatography (silica gel, 25 mm x 21.5 cm column, hexanes/EtOAc, 65/35) 168 mg of carbonate **25g** (69%) as a white solid.

Data for 25g:

mp: 144-145 °C

$^1\text{H NMR}$ : (500 MHz,  $\text{CDCl}_3$ )

7.94 (d,  $J = 8.0$  Hz, 2 H, HC(14)), 7.63 (t,  $J = 8.0$  Hz, 1 H, HC(15)), 7.29-7.20 (m, 5 H, HC(9,10,11)), 5.08 (ddd,  $J = 11, 4.0, 3.0$  Hz, 1 H, HC(4)), 4.36-4.28 (m, 3 H, HC(6, 7)), 1.98-1.93 (m, 1 H, HC(5)), 1.88-1.80 (m, 1 H, HC(5)).

$^{13}\text{C NMR}$ : (125 MHz,  $\text{CDCl}_3$ )

147.9 (C(2)), 137.4 (q,  $J = 29$  Hz, C(13)), 135.9, 130.5 (q,  $J = 5.5$  Hz, C(14)),

129.8, 128.8, 128.5, 128.2, 125.8, 123.1 (q,  $J = 273$  Hz, C(16)), 81.0 (C(4)), 66.4 (C(6)), 53.9 (C(7)), 25.7 (C(5))

$^{19}\text{F}$  NMR: (376 MHz,  $\text{CDCl}_3$ )

-58.34 ( $\text{CF}_3$ (16))

IR: (NaCl plates,  $\text{CH}_2\text{Cl}_2$ )

3088 (w), 3032 (w), 2980 (w), 2922 (w), 1752 (m), 1582 (w), 1496 (w), 1482 (w), 1454 (w), 1406 (w), 1333 (m), 1288 (m), 1253 (w), 1228 (w), 1202 (w), 1152 (m), 1114 (m), 1066 (w), 912 (w), 814 (w), 767 (w), 737 (m), 702 (m), 675 (m), 537 (w).

MS: (EI, 70 eV)

483.8 (1.5,  $\text{M}^+$ ), 147.0 (39.5), 117.0 (11.6), 115.0 (10.0), 105.0 (12.2), 91.0 (100.0).

HRMS: calcd for  $\text{C}_{19}\text{H}_{14}\text{F}_6\text{O}_3\text{Se}$ : 484.0012, found: 483.9995

TLC:  $R_f$  0.26 (hexanes/EtOAc, 65/63) [UV]

Opt. Rot.:  $[\alpha]_D^{24} + 203.3$  (c = 0.402,  $\text{CHCl}_3$ )

Analysis:  $\text{C}_{19}\text{H}_{14}\text{F}_6\text{O}_3\text{Se}$  (484.0012)

Calcd: C, 47.22; H, 2.92%

Found: C, 47.49; H, 2.83%

**General Procedure 3. Synthesis of Racemic Seleno Ethers.****Preparation of (+/-)-*trans*-3-[(4-Methoxyphenyl)seleno]-2-phenyloxolane (**28b**)**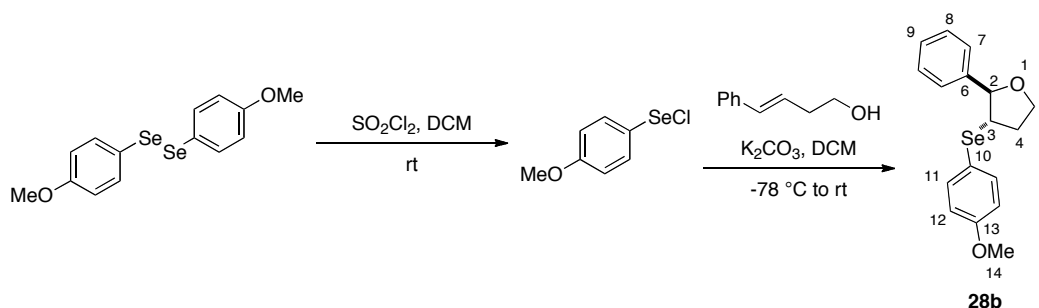

An oven-dried, 10-mL flask equipped with a magnetic stir bar was charged with 1,2-bis(4-methoxyphenyl)diselane (94.2 mg, 0.253 mmol, 0.75 equiv).  $\text{CH}_2\text{Cl}_2$  (0.5 mL) and  $\text{SO}_2\text{Cl}_2$  (34.1 mg, 0.253 mmol, 0.75 equiv) were added under an atmosphere of nitrogen and the resulting solution was stirred at room temperature for 15 min. In an oven-dried, 10-mL Schlenk flask equipped with a stir bar was added olefin (*E*)-**29** (50.0 mg, 0.337 mmol) and  $\text{CH}_2\text{Cl}_2$  (0.55 mL). The flask was cooled to  $-78\text{ }^\circ\text{C}$  and  $\text{K}_2\text{CO}_3$  (48.9 mg, 0.354 mmol, 1.05 equiv) was added under nitrogen. After 15 min of stirring at  $-78\text{ }^\circ\text{C}$ , the diselenide/ $\text{SO}_2\text{Cl}_2$  solution was added. The reaction mixture was allowed to warm to room temperature over 4 h and then was stirred for an additional 12 h. The reaction mixture was transferred to a 125-mL separatory funnel with an additional 10 mL of  $\text{CH}_2\text{Cl}_2$ . The mixture was washed with  $\text{H}_2\text{O}$  (1 x 20 mL) and the organic layer was separated. The aqueous layer was extracted with  $\text{CH}_2\text{Cl}_2$  (2 x 20 mL) and the combined organic extracts were washed with brine (1 x 25 mL) and dried over  $\text{MgSO}_4$ . The solution was filtered and concentrated on a rotavap ( $30\text{ }^\circ\text{C}$ , 30 mm Hg). The crude residue was purified by column chromatography (silica gel, 25 mm x 25 cm column, hexanes/EtOAc, 91/9) to afford 66.7 mg (59%) of racemic seleno ether **28b** as a clear, yellow oil.

Data for (+/-)-28b:<sup>1</sup>H NMR: (500 MHz, CDCl<sub>3</sub>)

7.46 (d,  $J = 8.5$  Hz, 2 H, HC(11)), 7.32-7.24 (m, 5 H, HC(7,8,9)), 6.79 (d,  $J = 8.5$  Hz, 2 H, HC(12)), 4.80 (d,  $J = 6.5$  Hz, 1 H, HC(2)), 4.15-4.11 (m, 1 H, HC(5)), 4.02-3.98 (m, 1 H, HC(5)), 3.82 (s, 3 H, H<sub>3</sub>C(14)), 3.45 (dd,  $J = 14.0, 6.0$  Hz, 1 H, HC(3)), 2.44-2.37 (m, 1 H, HC(4)), 2.11-2.04 (m, 1 H, HC(4)).

<sup>13</sup>C NMR: (125 MHz, CDCl<sub>3</sub>)

159.9, 141.4, 137.5, 128.3, 127.6, 125.9, 118.2 (C(10)), 114.7 (C(12)), 85.9 (C(2)), 67.9 (C(5)), 55.3 (C(14)), 47.9 (C(3)), 33.9 (C(4)).

IR: (NaCl plates, CH<sub>2</sub>Cl<sub>2</sub>)

3085 (w), 3062 (w), 3030 (w), 2938 (m), 2869 (m), 2837 (m), 2361 (w), 2342 (w), 1590 (s), 1570 (m), 1490 (s), 1455 (m), 1441 (m), 1401 (w), 1362 (w), 1286 (s), 1247 (s), 1173 (s), 1102 (w), 1028 (s), 1006 (w), 969 (w), 928 (w), 908 (w), 825.5 (m), 793 (w), 756 (m), 700 (s), 600 (w), 521 (w).

MS: (EI, 70 eV)

334.0 (5.9, M<sup>+</sup>), 226.0 (47.0), 187.0 (52.3), 171.9 (12.3), 147.1 (85.3), 117.1 (27.0), 105.0 (100.0), 91.0 (74.7), 77.0 (39.9) .

HRMS: calcd for C<sub>17</sub>H<sub>18</sub>O<sub>2</sub>Se: 334.0472, found: 334.0476TLC:  $R_f$  0.34 (hexanes/EtOAc, 91/9) [UV]

**Preparation of (+/-)-*trans*-2-Phenyl-3-[[2,4,6-tri(propan-2-yl)phenyl]seleno]oxolane (28c)**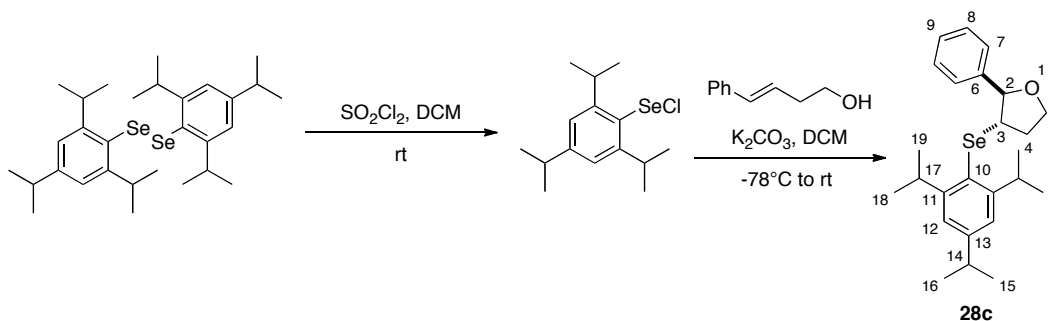

Following General Procedure 3, a solution of 1,2-bis(2,4,6-triisopropylphenyl)diselane (286 mg, 0.506 mmol, 0.75 equiv) and  $\text{SO}_2\text{Cl}_2$  (68.3 mg, 0.506 mmol, 0.75 equiv) in  $\text{CH}_2\text{Cl}_2$  (1.3 mL) were added at  $-78^\circ\text{C}$  to a solution of olefin (*E*)-**29** (100 mg, 0.674 mmol,) and  $\text{K}_2\text{CO}_3$  (112 mg, 0.810 mmol, 1.20 equiv) in  $\text{CH}_2\text{Cl}_2$  (2.0 mL) to yield after column chromatography (silica gel, 25 mm x 25 cm column, hexanes/EtOAc, 97/3) 218 mg (75%) of racemic seleno ether **28c** as a clear, colorless oil.

**Data for (+/-)-28c:**

**$^1\text{H NMR}$ :** (500 MHz,  $\text{CDCl}_3$ )

7.29-7.22 (m, 3 H), 7.16 (d,  $J = 7.0$  Hz, 2 H), 7.01 (s, 2 H, HC(11)), 4.83 (d,  $J = 6.0$  Hz, 1 H, HC(2)), 4.20-4.12 (m, 2 H,  $\text{H}_2\text{C}(5)$ ), 3.81 (sept,  $J = 6.5$  Hz, 2 H, HC(17)), 3.35-3.31 (m, 1H, HC(3)), 2.91 (sept,  $J = 7.0$  Hz, 1H, HC(14)), 2.43-2.35 (m, 1H, HC(4)), 2.14-2.08 (m, 1H, HC(4)), 1.28 (dd,  $J = 7.0, 1.0$  Hz, 6H), 1.16 (d,  $J = 6.5$  Hz, 12H).

**$^{13}\text{C NMR}$ :** (125 MHz,  $\text{CDCl}_3$ )

153.2, 149.9, 141.8, 128.2, 127.4, 126.3, 125.8, 121.7, 86.2 (C(2)), 68.2 (C(5)), 48.6 (C(3)), 34.3, 34.2, 34.1, 24.4, 24.3, 23.9, 23.8.

**IR:** (NaCl plates, neat)

3062 (w), 3034 (w), 2960 (s), 2927 (s), 2868 (s), 1595 (m), 1562 (w), 1535 (w),



1494 (w), 1462 (s), 1422 (m), 1383 (m), 1362 (m), 1309 (w), 1247 (w), 1166 (m), 1101 (w), 1084 (m), 1067 (s), 1028 (m), 961 (w), 935 (w), 906 (w), 877 (m), 752 (m), 734 (m), 699 (s), 650 (w), 622 (w), 516 (w).

**MS:** (EI, 70 eV)

430.2 (9.6, M<sup>+</sup>), 284.1 (23.8), 282.1 (15.0), 242.1 (25.8), 240.1 (13.0), 226.0 (17.0), 204.2 (12.1), 203.2 (79.6), 199.0 (10.0), 197.0 (13.9), 148.1 (10.2), 147.1 (100.0), 146.1 (26.8), 145.1 (13.2), 117.1 (13.7), 105.0 (44.6), 91.1 (40.7), 77.1 (13.7).

**HRMS:** calcd for C<sub>25</sub>H<sub>34</sub>OSe: 430.1775, found: 430.1767

**TLC:** R<sub>f</sub> 0.41 (hexanes/EtOAc, 97/3) [UV]

### Preparation of (+/-)-*trans*-2-Phenyl-3-[[4-(trifluoromethyl)phenyl]seleno]oxolane (**28d**)

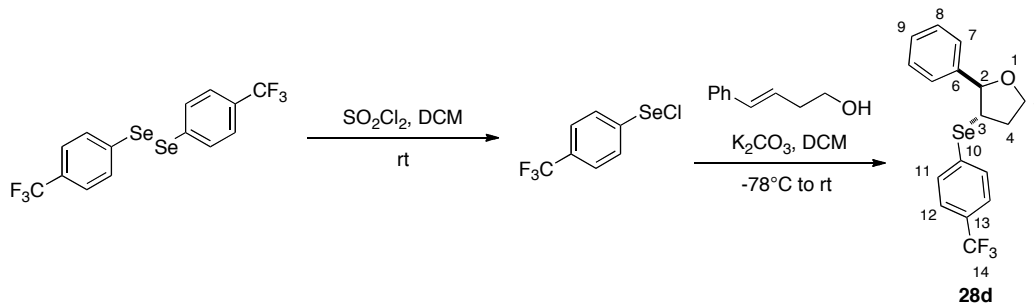

Following General Procedure 3, a solution of 1,2-bis(4-trifluoromethylphenyl)diselane (227 mg, 0.506 mmol, 0.75 equiv) and SO<sub>2</sub>Cl<sub>2</sub> (68.3 mg, 0.506 mmol, 0.75 equiv) in CH<sub>2</sub>Cl<sub>2</sub> (1.3 mL) were added at -78 °C to a solution of olefin (*E*)-**29** (100 mg, 0.674 mmol) and K<sub>2</sub>CO<sub>3</sub> (112 mg, 0.810 mmol, 1.20 equiv) in CH<sub>2</sub>Cl<sub>2</sub> (2.0 mL) to yield after column chromatography (silica gel, 25 mm x 24 cm column, hexanes/EtOAc, 95/5) 181 mg (72%) of racemic seleno ether **28d** as a clear colorless oil.

Data for (+/-)-28d:<sup>1</sup>H NMR: (500 MHz, CDCl<sub>3</sub>)

7.46 (d,  $J = 8.5$  Hz, 2 H, HC(12)), 7.41 (d,  $J = 8.5$  Hz, 2 H, HC(11)), 7.32-7.26 (m, 5 H, HC(7, 8, 9)), 4.83 (d,  $J = 7.0$  Hz, 1 H, HC(2)), 4.23-4.19 (m, 1 H, HC(5)), 4.08 (dd,  $J = 14.0, 6.5$  Hz, 1 H, HC(5)), 3.66 (dd,  $J = 14.0, 6.5$  Hz, 1 H, HC(3)), 2.60-2.53 (m, 1 H, HC(4)), 2.17-2.11 (m, 1H, HC(4)).

<sup>13</sup>C NMR: (125 MHz, CDCl<sub>3</sub>)

140.6, 134.4, 133.2, 129.3 (q,  $J = 32$  Hz, C(13)), 128.4, 127.9, 125.9, 125.6 (q,  $J = 3.7$  Hz, C(12)), 123.9 (q,  $J = 271$  Hz, C(14)), 86.4 (C(2)), 67.8 (C(5)), 47.5 (C(3)), 34.1 (C(4)).

<sup>19</sup>F NMR: (470 MHz, CDCl<sub>3</sub>)

-63.1 (F<sub>3</sub>C(14)).

IR: (NaCl plates, neat)

3065 (w), 3033 (w), 2976 (w), 2943 (w), 2872 (m), 1602 (s), 1572 (w), 1495 (m), 1454 (m), 1398 (m), 1326 (s), 1280 (w), 1165 (s), 1123 (s), 1078 (s), 1057 (s), 1028 (m), 1014 (s), 972 (w), 929 (w), 908 (w), 826 (m), 774 (w), 756 (m), 700 (s), 689 (m), 631 (w), 592 (w), 534 (w).

MS: (EI, 70 eV)

372.0 (29.8, M<sup>+</sup>), 370.0 (14.8), 266.0 (56.4), 264.0 (26.9), 263.0 (10.1), 262.0 (10.1), 197.0 (12.9), 185.1 (37.4), 147.1 (33.8), 146.1 (100.0), 145.0 (11.6), 135.1 (10.3), 117.1 (21.1), 116.1 (10.6), 115.1 (25.1), 105.0 (46.4), 91.1 (38.0), 77.1 (27.3), 62.1 (32.6).

HRMS: calcd for C<sub>17</sub>H<sub>15</sub>F<sub>3</sub>OSe: 372.0240, found: 372.0228

TLC:  $R_f$  0.33 (hexanes/EtOAc, 95/5) [UV]

**Preparation of (+/-)-*trans*-2-Phenyl-3-[[2-(trifluoromethyl)phenyl]seleno]oxolane (**28e**)**

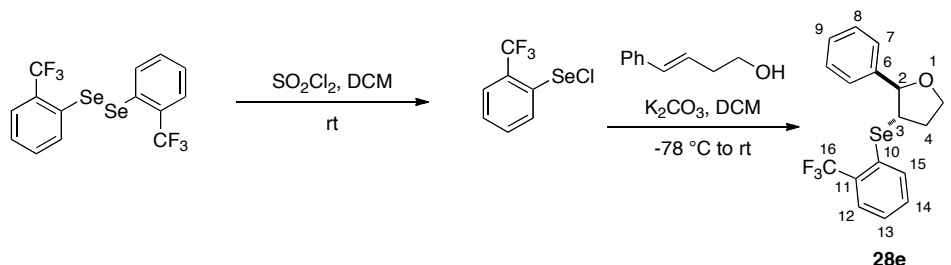

Following General Procedure 3, a solution of 1,2-bis(4-trifluoromethylphenyl)diselane (227 mg, 0.506 mmol, 0.75 equiv) and  $\text{SO}_2\text{Cl}_2$  (68.3 mg, 0.506 mmol, 0.75 equiv) in  $\text{CH}_2\text{Cl}_2$  (1.3 mL) were added at  $-78\text{ }^\circ\text{C}$  to a solution of olefin (*E*)-**29** (100 mg, 0.674 mmol) and  $\text{K}_2\text{CO}_3$  (112 mg, 0.810 mmol, 1.20 equiv) in  $\text{CH}_2\text{Cl}_2$  (2.0 mL) to yield after column chromatography (silica gel, 25 mm x 24 cm column, hexanes/EtOAc, 95/5) 163 mg (65%) of racemic seleno ether **28e** as a clear oil.

Data for (+/-)-**28e**:

$^1\text{H NMR}$ : (500 MHz,  $\text{CDCl}_3$ )

7.65 (d,  $J = 8.0$  Hz, 1 H, HC(12)), 7.44 (d,  $J = 7.5$  Hz, 1 H), 7.32-7.24 (m, 7 H), 4.88 (d,  $J = 6.0$  Hz, 1 H, HC(2)), 4.24-4.20 (m, 1 H, HC(5)), 4.14-4.09 (m, 1 H, HC(5)), 3.71 (dd,  $J = 13.5, 6.0$  Hz, 1 H, HC(3)), 2.56-2.49 (m, 1 H, HC(4)), 2.16-2.10 (m, 1 H, HC(4)).

$^{13}\text{C NMR}$ : (125 MHz,  $\text{CDCl}_3$ )

140.9, 135.8, 132.0 (q,  $J = 29$  Hz, C(11)), 131.8, 128.5, 128.3, 127.8, 127.2, 126.7 (q,  $J = 5.5$  Hz, C(12)), 125.9, 123.7 (q,  $J = 272$  Hz, C(16)), 86.2 (C(2)), 67.8 (C(5)), 48.1 (C(3)), 33.8 (C(4)).

$^{19}\text{F}$  NMR: (470 MHz,  $\text{CDCl}_3$ )

-60.7 ( $\text{F}_3\text{C}(16)$ ).

IR: (NaCl plates, neat)

3064 (w), 3032 (w), 2977 (w), 2943 (w), 2872 (m), 1592 (m), 1571 (w), 1494 (w), 1469 (w), 1444 (m), 1312 (s), 1259 (s), 1171 (s), 1128 (s), 1110 (s), 1088 (s), 1067 (m), 1039 (m), 1027 (s), 972 (w), 929 (w), 908 (w), 761 (s), 729 (m), 699 (s), 683 (m), 642 (m), 596 (w), 571 (w).

MS: (EI, 70 eV)

372.0 (24.6,  $\text{M}^+$ ), 370.0 (12.3), 268.0 (10.7), 266.0 (62.1), 264.0 (29.4), 263.0 (10.8), 262.0 (11.2), 185.1 (26.0), 147.1 (47.9), 146.1 (100.0), 145.0 (11.9), 117.1 (19.3), 115.1 (24.5), 105.0 (48.9), 91.1 (40.8), 77.0 (27.3), 62.1 (54.5), 61.1 (12.6).

HRMS: calcd for  $\text{C}_{17}\text{H}_{15}\text{F}_3\text{OSe}$ : 372.0240, found: 372.0242

TLC:  $R_f$  0.27 (hexanes/EtOAc, 95/5) [UV]

### Preparation of (+/-)-*trans*-2-Phenyl-3-[[2-(trifluoromethyl)phenyl]seleno]oxolane (**28g**)

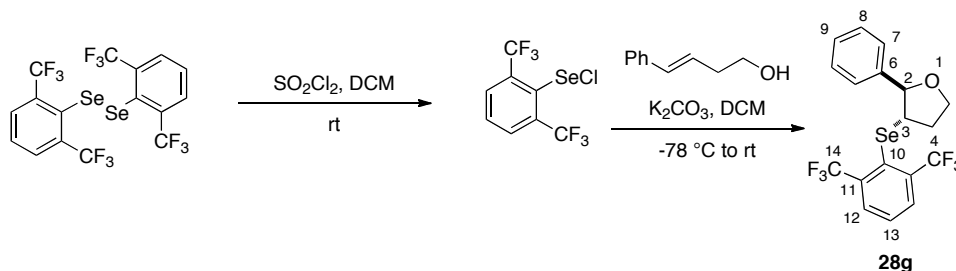

Following General Procedure 3, a solution of 1,2-bis(2,6-difluoromethylphenyl)diselane (148 mg, 0.253 mmol, 0.75 equiv) and  $\text{SO}_2\text{Cl}_2$  (1.02 g, 7.59 mmol, 22.5 equiv) in  $\text{CH}_2\text{Cl}_2$  (0.5 mL) were added at  $-78\text{ }^\circ\text{C}$  to a solution of olefin (*E*)-**29** (50.0 mg, 0.337 mmol, 1.00 equiv) and  $\text{K}_2\text{CO}_3$  (46.8 mg, 0.354 mmol, 1.05 equiv) in  $\text{CH}_2\text{Cl}_2$  (0.26 mL) to yield after column chromatography (hexanes/EtOAc, 90/10) 40 mg (27%) of racemic

seleno ether **28g** as a clear yellow oil.

Data for (+/-)-**28g**:

<sup>1</sup>H NMR: (500 MHz, CDCl<sub>3</sub>)

7.91 (d, *J* = 8.0 Hz, 2 H, HC(12)), 7.58 (t, *J* = 8.0 Hz, 1 H, HC(13)), 7.26-7.15 (m, 5 H), 4.94 (d, *J* = 5.4 Hz, 1 H, HC(2)), 4.17-4.13 (m, 1 H), 4.08 (dd, *J* = 15.5, 8.0 Hz, 1 H), 3.78 (dd, *J* = 12.5, 6.0 Hz, 1H), 2.28-2.20 (m, 1 H), 2.04-1.98 (m, 1 H).

### Preparation of (2*S*,3*S*)-Tetrahydro-2-phenyl-2-furanol (**27**) (Scheme 11)

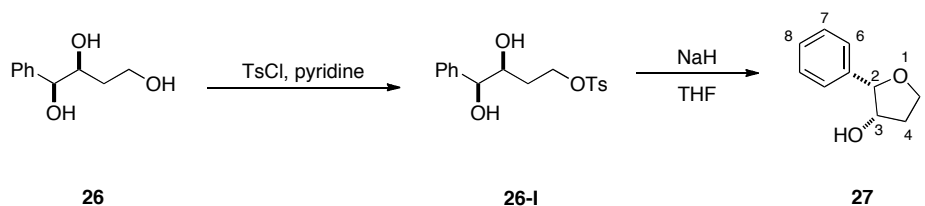

To an oven-dried, 10-mL, Schlenk flask equipped with a magnetic stir bar, was added triol **26** (177 mg, 0.97 mmol), and pyridine (1.0 mL). The solution was cooled to -10 °C (NaCl/ice bath temperature) and a solution of *p*-toluenesulfonyl chloride (185 mg, 0.97 mmol, 1.00 equiv) in pyridine (1.71 mL) was added slowly over 45 min. The reaction mixture was stirred at -10 °C for 3h 15 min. The reaction mixture was poured onto ice and 2 N HCl (10 mL) was added. The solution was then transferred to a 125-mL separatory funnel and the mixture was extracted with CH<sub>2</sub>Cl<sub>2</sub> (3 x 10 mL). The combined organic extracts were dried over Na<sub>2</sub>SO<sub>4</sub>, filtered concentrated on the rotavap (30 °C, 30 mm Hg), and dried under high vacuum. <sup>1</sup>H NMR spectroscopic analysis of the crude product showed complete conversion of **26** to **26-I**. The crude product was used for the next step without further purification.

To an oven-dried, 25-mL, Schlenk flask equipped with a magnetic stir bar, was added sodium hydride (58.2 mg, 2.43 mmol, 2.50 equiv) in the glove box. The flask was attached to the

manifold and THF (6 mL) was added to it. The suspension was cooled to 0 °C and a solution of **26-I** in THF (6 mL) was added to it dropwise. The resulting solution was stirred at 0 °C for 1.5 h and then stirred at room temperature for 13 h. Satd. aq. NH<sub>4</sub>Cl (10 mL) was added and then the reaction mixture was transferred to a 125-mL separatory funnel and extracted with Et<sub>2</sub>O (3 x 15 mL). The combined organic extracts were washed with brine (30 mL), dried over Na<sub>2</sub>SO<sub>4</sub>, filtered, and concentrated on the rotavap (30 °C, 30 mm Hg). The crude residue was purified by column chromatography (silica gel, 25 mm x 24 cm column, hexanes/TBME, 3/2) to afford 63.2 mg of **27** (40% over two steps) as a clear oil.

Data for **27**:

<sup>1</sup>H NMR: (500 MHz, CDCl<sub>3</sub>)

7.38-7.26 (m, 5 H, HC(6, 7, 8)), 4.86 (d, *J* = 3.5 Hz, 1H, HC(2)), 4.37 (br s, 1 H), 4.24 (dd, *J* = 16.5, 8.5 Hz, 1 H, HC(5)), 4.03-3.99 (m, 1 H, HC(5)), 2.29-2.22 (m, 1 H, HC(4)), 2.14-2.09 (m, 1 H, HC(4)), 1.34 (br s, 1H, HOC).

<sup>13</sup>C NMR: (125 MHz, CDCl<sub>3</sub>)

136.9, 128.4, 127.8, 126.7, 84.9 (C(2)), 73.5 (C(3)), 66.9 (C(5)), 34.7 (C(4)).

MS: (EI, 70 eV)

164.1 (17.7, M<sup>+</sup>), 120.1 (18.4), 108.1 (12.2), 107.1 (100.0), 105.0 (15.0), 91.1 (17.1), 79.1 (45.5), 77.0 (26.3), 58.1 (12.2), 57.1 (24.9), 51.1 (11.0).

HRMS: calcd for C<sub>10</sub>H<sub>12</sub>O<sub>2</sub>: 164.0837, found: 164.0844

TLC: *R<sub>f</sub>* 0.25 (hexanes/TBME, 3/2) [UV, KMnO<sub>4</sub>]

**Preparation of (2*S*, 3*R*)-Preparation of 2-phenyl-3-(phenylseleno)oxolane (**28a**) (Scheme 11)**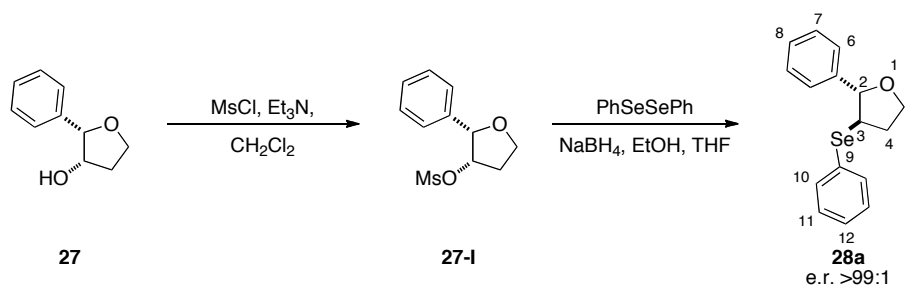

To an oven-dried, 10-mL, Schlenk flask equipped with a magnetic stir bar, was added a solution of **27** (63.2 mg, 0.38 mmol) in  $\text{CH}_2\text{Cl}_2$  (3.8 mL),  $\text{Et}_3\text{N}$  (0.16 mL, 1.15 mmol, 3.00 equiv), and methanesulfonyl chloride (89  $\mu\text{L}$ , 1.15 mmol, 3.00 equiv). The solution was stirred at room temperature for 1h 15 min, and concentrated on the rotavap (30 °C, 30 mm Hg).  $^1\text{H}$  NMR spectroscopic analysis of the crude product showed complete conversion of **27** to **27-I**. The crude product was used for the next step without further purification.

To an oven-dried, 10-mL, Schlenk flask equipped with a magnetic stir bar, was added diphenyl diselenide (96.1 mg, 0.31 mmol, 0.80 equiv), sodium borohydride (23.3 mg, 0.61 mmol, 1.60 equiv), and EtOH (0.5 mL) and the mixture was stirred at room temperature for 15 min. A solution of **27-I** in THF (2 mL) was added and the resulting mixture was concentrated under high vacuum. EtOH (0.1 mL) and THF (0.1 mL) were added to it and the solution was stirred at 40 °C (oil bath temperature) for 14.5 h. THF (0.1 mL) was added and the reaction was stirred at 40 °C for another 24 h.  $^1\text{H}$  NMR spectroscopic analysis of the reaction aliquot showed 50% conversion of **27-I** to **28a**. The reaction mixture was cooled to room temperature, quenched with  $\text{H}_2\text{O}$  (10 mL), and transferred to a 125-mL separatory funnel with additional  $\text{CH}_2\text{Cl}_2$  (15 mL). The aqueous layer was extracted with  $\text{CH}_2\text{Cl}_2$  (2 x 15 mL) and the combined organic extracts were washed with brine (30 mL), dried over  $\text{MgSO}_4$ , filtered, and concentrated on the rotavap (30 °C, 30 mm Hg). The crude residue was re-subjected to the reaction conditions as follows. To an

oven-dried, 10-mL, Schlenk flask equipped with a magnetic stir bar, was added diphenyl diselenide (60.0 mg, 0.19 mmol, 0.50 equiv), sodium borohydride (21.8 mg, 0.58 mmol, 1.50 equiv), and EtOH (0.5 mL) and the mixture was stirred at room temperature for 15 min. A solution of the crude mixture of **27-I** and **28a** in THF (0.5 mL) was added and the resulting mixture was concentrated under high vacuum. EtOH (0.1 mL) and THF (0.1 mL) were added to it and the solution was stirred at 40 °C (oil bath temperature) for 42 h. The reaction mixture was cooled to room temperature, quenched with H<sub>2</sub>O (15 mL), and transferred to a 125-mL separatory funnel with additional CH<sub>2</sub>Cl<sub>2</sub> (15 mL). The aqueous layer was extracted with CH<sub>2</sub>Cl<sub>2</sub> (2 x 15 mL) and the combined organic extracts were washed with brine (30 mL), dried over MgSO<sub>4</sub>, filtered, and concentrated on the rotavap (30 °C, 30 mm Hg). <sup>1</sup>H NMR spectroscopic analysis of the crude product showed complete consumption of **27-I**. The crude product was purified by column chromatography (silica gel, 25 mm x 31 cm column, hexanes/EtOAc, 96/4) to afford 48.0 mg of **28a** (41% over two steps) as a clear yellow oil.

Data for **28a**:

<sup>1</sup>H NMR: (500 MHz, CDCl<sub>3</sub>)

7.51 (d, *J* = 7.0 Hz, 2 H), 7.34-7.24 (m, 8 H), 4.87 (d, *J* = 6.0 Hz, 1 H, HC(2)), 4.18 (dd, *J* = 13.7, 7.2 Hz, 1 H, HC(5)), 4.07 (dd, *J* = 15.5, 7.5 Hz, 1 H, HC(5)), 3.60 (dd, *J* = 13.5, 6.0 Hz, 1 H, HC(3)), 2.53-2.46 (m, 1 H, HC(4)), 2.18-2.12 (m, 1 H, HC(4)).

MS: (EI, 70 eV)

303.9 (26.3, M<sup>+</sup>), 301.9 (12.9), 197.9 (23.3), 195.9 (11.3), 182.9 (17.1), 156.9 (18.8), 154.9 (10.2), 147.0 (56.9), 146.0 (100.0), 145.0 (11.4), 118.0 (22.5), 117.0 (94.1), 116.0 (13.8), 115.0 (34.6), 105.0 (67.1), 104.0 (13.3), 91.0 (68.8), 78.0



(24.4), 77.0 (55.0).

HRMS: calcd for C<sub>16</sub>H<sub>16</sub>OSe: 304.0366, found: 304.0376

SFC: (2*R*,3*S*)-31a, t<sub>R</sub> 6.8 min (<1%); (2*S*,3*R*)-31a, t<sub>R</sub> 8.4 min (>99%), (Chiralpak AD, 125 bar, 3% MeOH in CO<sub>2</sub>, 3.0 mL/min, 220 nm, 40 °C)

### Configurational Stability of Seleno Ether **28a** toward Brønsted Acids

#### Table 1, entry 1

To an HPLC vial was added a solution of ether **28a** (e.r. = 98:2) (2.60 mg, 0.009 mmol) in CH<sub>2</sub>Cl<sub>2</sub> (0.9 mL). Triflic acid (0.076 μL, 0.001 mmol, 0.1 equiv) in CH<sub>2</sub>Cl<sub>2</sub> (10 μL) was added over 1 min. After 30 minutes an aliquot of the reaction was directly analyzed on the HPLC to determine the enantiomeric ratio of the product.

HPLC: t<sub>R</sub> 6.1 min (50.0%); t<sub>R</sub> 6.7 min (50.0%), (Chiralpak OD-H, 42 bar, 95:5 hexanes/*i*-PrOH, 3.0 mL/min, 220 nm, 25 °C)

#### Table 1, entries 2 and 3

To an HPLC vial was added a solution of ether **28a** (e.r. = 98:2) (2.60 mg, 0.009 mmol) in CH<sub>2</sub>Cl<sub>2</sub> (0.9 mL). Methanesulfonic acid (0.058 μL, 0.001 mmol, 0.1 equiv) in CH<sub>2</sub>Cl<sub>2</sub> (10 μL) was added over 1 min. An aliquot of the reaction was directly analyzed on the HPLC to determine the enantiomeric ratio of the product.

HPLC (0.5 h): t<sub>R</sub> 6.1 min (98.0%); t<sub>R</sub> 6.7 min (2.0%), (Chiralpak OD-H, 42 bar, 95:5 hexanes/*i*-PrOH, 3.0 mL/min, 220 nm, 25 °C)

HPLC (3.0 h): t<sub>R</sub> 6.1 min (87.0%); t<sub>R</sub> 6.7 min (13.0%), (Chiralpak OD-H, 42 bar, 95:5 hexanes/*i*-PrOH, 3.0 mL/min, 220 nm, 25 °C)

**Table 1, entry 4**

To an HPLC vial was added a solution of ether **28a** (e.r. = 98:2) (2.60 mg, 0.009 mmol) in CH<sub>2</sub>Cl<sub>2</sub> (0.9 mL). Trifluoroacetic acid (0.067  $\mu$ L, 0.001 mmol, 0.1 equiv) in CH<sub>2</sub>Cl<sub>2</sub> (10  $\mu$ L) was added over 1 min. After 30 min and 24 h an aliquot of the reaction was directly analyzed on the HPLC to determine the enantiomeric ratio of the product.

HPLC (0.5 h): t<sub>R</sub> 6.1 min (98.0%); t<sub>R</sub> 6.7 min (2.0%), (Chiralpak OD-H, 42 bar, 95:5 hexanes/*i*-PrOH, 3.0 mL/min, 220 nm, 25 °C)

HPLC (24 h): t<sub>R</sub> 6.1 min (98.0%); t<sub>R</sub> 6.7 min (2.0%), (Chiralpak OD-H, 42 bar, 95:5 hexanes/*i*-PrOH, 3.0 mL/min, 220 nm, 25 °C)

**Table 1 entry 5**

To an oven-dried NMR tube was added trifluoroacetic acid (0.20  $\mu$ L, 0.002 mmol, 0.12 equiv), and CDCl<sub>3</sub> (0.1 mL). A solution of seleno ether **28a** (e.r. = >99:1) (6.80 mg, 0.022 mmol) in CDCl<sub>3</sub> (0.12 mL) was added and the tube was secured with a septum. The resulting solution was shaken and then allowed to sit for 24 h at room temperature. The mixture was quenched with 25  $\mu$ L of triethylamine and then was concentrated on the rotavap (30 °C, 30 mm Hg). The crude residue was dissolved in hexanes/EtOAc, (9:1) (2 mL) and the solution was filtered through a 3 cm pipette column of silica gel. The column was eluted with hexanes/EtOAc, (9:1) (6 mL) and the filtrate was concentrated on the rotavap (30 °C, 30 mm Hg) to afford **28a** as a light-yellow oil. The enantiomeric composition of the product was determined by CSP-SFC analysis of the product.

SFC: (2*R*,3*S*)-**28a**, t<sub>R</sub> 6.8 min (<1%); (2*S*,3*R*)-**28a**, t<sub>R</sub> 8.4 min (>99%), (Chiralpak AD, 125 bar, 3% MeOH in CO<sub>2</sub>, 3.0 mL/min, 220 nm, 40 °C)

**Table 1 entry 6**

To an oven-dried NMR tube was added trifluoroacetic acid (1.70  $\mu\text{L}$ , 0.022 mmol, 1.00 equiv), and  $\text{CDCl}_3$  (0.1 mL). A solution of seleno ether **28a** (e.r. = >99:1) (6.80 mg, 0.022 mmol) in  $\text{CDCl}_3$  (0.12 mL) was added and the tube was secured with a septum. The resulting solution was shaken and then allowed to sit for 24 h at room temperature. The mixture was quenched with 25  $\mu\text{L}$  of triethylamine and then was concentrated on the rotavap (30  $^\circ\text{C}$ , 30 mm Hg). The crude residue was dissolved in hexanes/EtOAc, (9:1) (2 mL) and the solution was filtered through a 3 cm pipette column of silica gel. The column was eluted with hexanes/EtOAc, (9:1) (6 mL) and the filtrate was concentrated on the rotavap (30  $^\circ\text{C}$ , 30 mm Hg) to afford **28a** as a light-yellow oil. The enantiomeric composition of the product was determined by CSP-SFC analysis of the product.

**SFC:** (2*R*,3*S*)-**28a**,  $t_{\text{R}}$  6.8 min (50%); (2*S*,3*R*)-**28a**,  $t_{\text{R}}$  8.4 min (50%), (Chiralpak AD, 125 bar, 3% MeOH in  $\text{CO}_2$ , 3.0 mL/min, 220 nm, 40  $^\circ\text{C}$ )

**General Procedure 4. Configurational Stability of Seleno Ethers 28d-f****Configurational Stability of Seleno Ether 28d**

To an oven-dried NMR tube was added trifluoroacetic acid (2.70  $\mu\text{L}$ , 0.036 mmol, 1.00 equiv), and  $\text{CDCl}_3$  (0.1 mL). A solution of seleno ether **28d** (e.r. = 63.2:36.8) (13.3 mg, 0.036 mmol) in  $\text{CDCl}_3$  (0.25 mL) was added and the tube was secured with a septum. The resulting solution was shaken and then allowed to sit for 6 h at room temperature. The mixture was quenched with 25  $\mu\text{L}$  of triethylamine and then was concentrated on the rotavap (30  $^\circ\text{C}$ , 30 mm Hg). The crude residue was dissolved in hexanes/EtOAc, (9:1) (2 mL) and the solution was filtered through a 3 cm pipette column of silica gel. The column was eluted with hexanes/EtOAc,

(9:1) (6 mL) and the filtrate was concentrated on the rotavap (30 °C, 30 mm Hg) to afford **28d** as a clear colorless oil. The enantiomeric composition of the product was determined by CSP-SFC analysis of the product. Note: The reaction of carbonate **25d** afforded the product with very similar enantiomeric ratios when conducted for 6 h (62.1:37.9) or 24 h (61.8:38.2) suggesting that seleno ether **28d** does not racemize to a significant extent even over 24 h.

SFC: (2*R*,3*S*)-**28d**,  $t_R$  5.92 min (62.5%); (2*S*,3*R*)-**28d**,  $t_R$  7.30 min (37.5%), (Chiralpak AD, 125 bar, 2.5% MeOH in CO<sub>2</sub>, 3.0 mL/min, 220 nm, 40 °C)

### Configurational Stability of Seleno Ether **28e**

Following General Procedure 4, to an oven-dried NMR tube was added trifluoroacetic acid (2.80  $\mu$ L, 0.037 mmol, 1.00 equiv), and CDCl<sub>3</sub> (0.1 mL). A solution of seleno ether **28e** (e.r. = 64.5:35.5) (13.6 mg, 0.037 mmol) in CDCl<sub>3</sub> (0.27 mL) was added and the tube was secured with a septum. The resulting solution was shaken and then allowed to sit for 8 h at room temperature. The mixture was quenched with 25  $\mu$ L of triethylamine and then purified to obtain **28e** as a clear colorless oil. The enantiomeric composition of the product was determined by CSP-SFC analysis of the product. Note: The reaction of carbonate **25e** afforded the product with very similar enantiomeric ratios when conducted for 8 h (64.5:35.5) or 24 h (67.2:32.8) suggesting that seleno ether **28e** does not racemize to a significant extent even over 24 h.

SFC: (2*R*,3*S*)-**28e**,  $t_R$  8.07 min (64.2%); (2*S*,3*R*)-**28e**,  $t_R$  8.98 min (35.8%), (Chiralpak AD, 125 bar, 2.5% MeOH in CO<sub>2</sub>, 2.5 mL/min, 220 nm, 40 °C)

### Configurational Stability of Seleno Ether **28f** toward TFA

To an oven-dried NMR tube was added trifluoroacetic acid (3.70  $\mu$ L, 0.047 mmol, 1.00

equiv), and  $\text{CDCl}_3$  (0.1 mL). A solution of seleno ether **28f** (e.r. = 61:39) (16.6 mg, 0.047 mmol) in  $\text{CDCl}_3$  (0.37 mL) was added and the tube was secured with a septum. The resulting solution was shaken and then allowed to sit for 24 h at room temperature. The mixture was quenched with 25  $\mu\text{L}$  of triethylamine and then was concentrated on the rotavap (30 °C, 30 mm Hg). The crude residue was purified by chromatography (silica gel, 25 mm x 9 cm column, hexanes/EtOAc, 85/15) and the enantiomeric composition of the product **28f** was determined by CSP-SFC analysis of the product.

SFC: (2*R*,3*S*)-**28f**,  $t_{\text{R}}$  8.26 min (61.0%); (2*S*,3*R*)-**28f**,  $t_{\text{R}}$  11.56 min (39.0%), (Chiralpak AD, 125 bar, 12% MeOH in  $\text{CO}_2$ , 2.5 mL/min, 220 nm, 40 °C)

### Configurational Stability of Seleno Ether **28f** toward MsOH

To an oven-dried NMR tube was added a solution of seleno ether **28f** (e.r. = 90.4:9.6) (5.00 mg, 0.014 mmol) in  $\text{CDCl}_3$  (0.14 mL). Methanesulfonic acid (0.95  $\mu\text{L}$ , 0.014 mmol, 1.00 equiv) was added and the tube was secured with a septum. The resulting solution was shaken and then allowed to sit for 24 h at room temperature. The mixture was quenched with 25  $\mu\text{L}$  of triethylamine and then was concentrated on the rotavap (30 °C, 30 mm Hg). The mixture was quenched with 25  $\mu\text{L}$  of triethylamine and then was concentrated on the rotavap (30 °C, 30 mm Hg). The crude residue was purified by chromatography (silica gel, 25 mm x 9 cm column, hexanes/EtOAc, 85/15) and the enantiomeric composition of product **28f** was determined by CSP-SFC analysis of the product.

SFC: (2*R*,3*S*)-**28f**,  $t_{\text{R}}$  8.26 min (90.8%); (2*S*,3*R*)-**28f**,  $t_{\text{R}}$  11.56 min (9.2%), (Chiralpak AD, 125 bar, 12% MeOH in  $\text{CO}_2$ , 2.5 mL/min, 220 nm, 40 °C)

**General Procedure 5. Carbonate Opening Experiments.****Table 2, entry 1**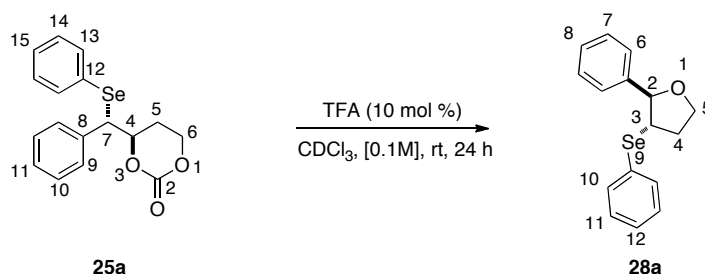

To an oven-dried NMR tube was added trifluoroacetic acid (0.45  $\mu\text{L}$ , 0.006 mmol, 0.1 equiv), and CDCl<sub>3</sub> (0.1 mL). A solution of carbonate **25a** (20.3 mg, 0.058 mmol) in CDCl<sub>3</sub> (0.48 mL) was added and the tube was secured with a septum. The resulting solution was shaken and then allowed to sit for 24 h at room temperature. <sup>1</sup>H NMR spectroscopy analysis of the reaction mixture showed 19% conversion to product by comparison of the integration of protons HC(4) of the carbonate **25a** and HC(2) of ether **28a**. The mixture was quenched with 10  $\mu\text{L}$  of triethylamine and then was concentrated on the rotavap (30  $^{\circ}\text{C}$ , 30 mm Hg). The crude residue was dissolved in hexanes/EtOAc, (9:1) (2 mL) and the solution was filtered through a 3 cm pipette column of silica gel. The column was eluted with hexanes/EtOAc, (9:1) (6 mL) and the filtrate was concentrated on the rotavap (30  $^{\circ}\text{C}$ , 30 mm Hg) to afford **28a** as a light-yellow oil. The enantiomeric composition of the product was determined by CSP-SFC analysis of the product.

SFC: (2*R*,3*S*)-**28a**,  $t_R$  6.8 min (57.4%); (2*S*,3*R*)-**28a**,  $t_R$  8.4 min (42.6%), (Chiralpak AD, 125 bar, 3% MeOH in CO<sub>2</sub>, 3.0 mL/min, 220 nm, 40  $^{\circ}\text{C}$ )

**Table 2, entry 2**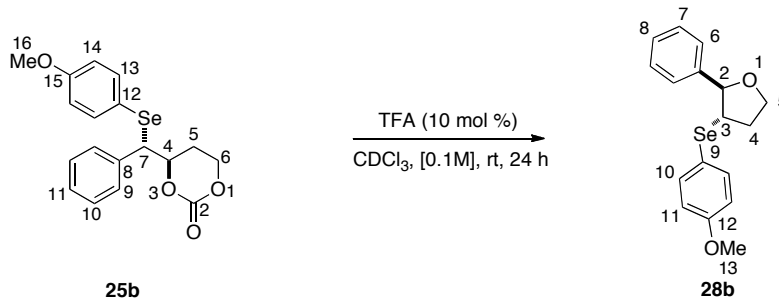

Following General Procedure 5, to an oven-dried NMR tube was added trifluoroacetic acid (0.40  $\mu\text{L}$ , 0.005 mmol, 0.1 equiv), and  $\text{CDCl}_3$  (0.1 mL). A solution of carbonate **25b** (20.0 mg, 0.053 mmol) in  $\text{CDCl}_3$  (0.43 mL) was added and the tube was secured with a septum. The resulting solution was shaken and then allowed to sit for 24 h at room temperature.  $^1\text{H}$  NMR spectroscopy analysis of the reaction mixture showed 46% conversion to product by integration of HC(5) of **25b** and **28b**. After purification, **28b** was obtained as a light-yellow oil. The enantiomeric composition of the product was determined by CSP-SFC analysis of the product.

SFC: (2*R*,3*S*)-**28b**,  $t_R$  11.33 min (52.5%); (2*S*,3*R*)-**28b**,  $t_R$  12.82 min (47.5%), (Chiralpak AD, 125 bar, 4% MeOH in  $\text{CO}_2$ , 2.5 mL/min, 220 nm, 40  $^\circ\text{C}$ )

**Table 2, entry 3**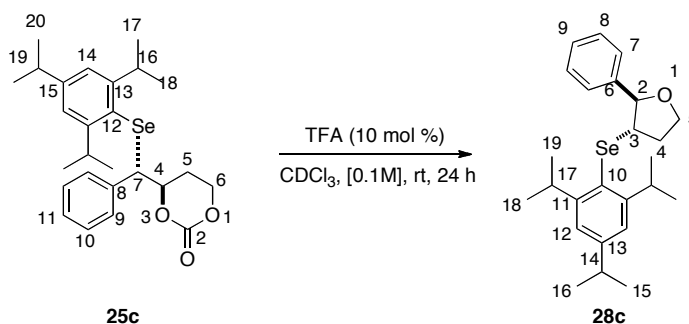

Following General Procedure 5, to an oven-dried NMR tube was added trifluoroacetic acid (0.38  $\mu\text{L}$ , 0.005 mmol, 0.1 equiv), and  $\text{CDCl}_3$  (0.1 mL). A solution of carbonate **25c** (23.4

mg, 0.049 mmol) in  $\text{CDCl}_3$  (0.39 mL) was added and the tube was secured with a septum. The resulting solution was shaken and then allowed to sit for 24 h at room temperature.  $^1\text{H}$  NMR spectroscopy analysis of the reaction mixture showed 44% conversion to product by comparison of the integrations of HC(5) in the carbonate and the ether. After purification, **28c** was obtained as a light-yellow oil. The enantiomeric composition of the product was determined by CSP-SFC analysis of the product.

**SFC:** (2*S*,3*R*)-**28c**,  $t_R$  11.81 min (37.2%); (2*R*,3*S*)-**28c**,  $t_R$  14.90 min (62.8%), (Chiralpak OD, 125 bar, 2.5% MeOH in  $\text{CO}_2$ , 2.5 mL/min, 220 nm, 40 °C)

#### Table 2, entry 4

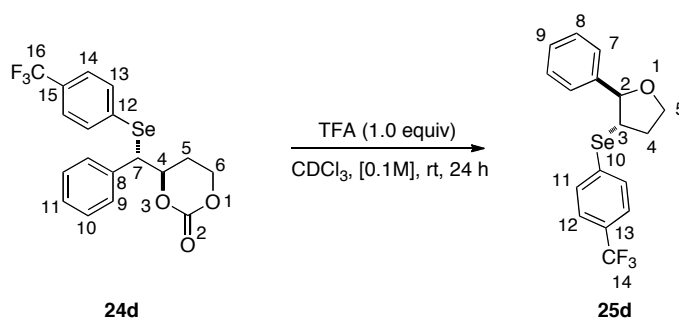

Following General Procedure 5, to an oven-dried NMR tube was added trifluoroacetic acid (3.7  $\mu\text{L}$ , 0.048 mmol, 1.0 equiv), and  $\text{CDCl}_3$  (0.1 mL). A solution of carbonate **25d** (20.0 mg, 0.048 mmol) in  $\text{CDCl}_3$  (0.38 mL) was added and the tube was secured with a septum. The resulting solution was shaken and then allowed to sit for 24 h at room temperature.  $^1\text{H}$  NMR spectroscopy analysis of the reaction mixture showed 100% conversion to product. After purification, **28d** was obtained as a clear colorless oil. The enantiomeric composition of the product was determined by CSP-SFC analysis of the product.

**SFC:** (2*R*,3*S*)-**28d**,  $t_R$  5.92 min (61.8%); (2*S*,3*R*)-**28d**,  $t_R$  7.30 min (38.2%), (Chiralpak AD, 125 bar, 2.5% MeOH in  $\text{CO}_2$ , 3.0 mL/min, 220 nm, 40 °C)



Opt. Rot.:  $[\alpha]_D^{24} + 5.60$  (c = 1.0, CHCl<sub>3</sub>)

**Table 2, entry 5**

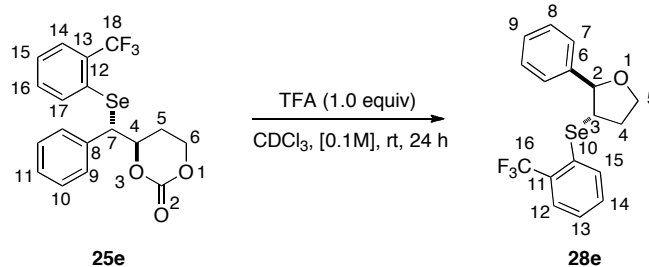

Following General Procedure 5, to an oven-dried NMR tube was added trifluoroacetic acid (3.9  $\mu$ L, 0.051 mmol, 1.0 equiv), and CDCl<sub>3</sub> (0.1 mL). A solution of carbonate **25e** (20.0 mg, 0.051 mmol) in CDCl<sub>3</sub> (0.41 mL) was added and the tube was secured with a septum. The resulting solution was shaken and then allowed to sit for 24 h at room temperature. <sup>1</sup>H NMR spectroscopy analysis of the reaction mixture showed 100% conversion to product. After purification, **28e** was obtained as a clear oil. The enantiomeric composition of the product was determined by CSP-SFC analysis of the product.

SFC: (2*R*,3*S*)-**28e**,  $t_R$  8.07 min (67.2%); (2*S*,3*R*)-**28e**,  $t_R$  8.98 min (32.8%), (Chiralpak

AD, 125 bar, 2.5% MeOH in CO<sub>2</sub>, 2.5 mL/min, 220 nm, 40 °C)

Opt. Rot.:  $[\alpha]_D^{24} + 0.28$  (c = 0.97, CHCl<sub>3</sub>)

**Table 2, entry 6**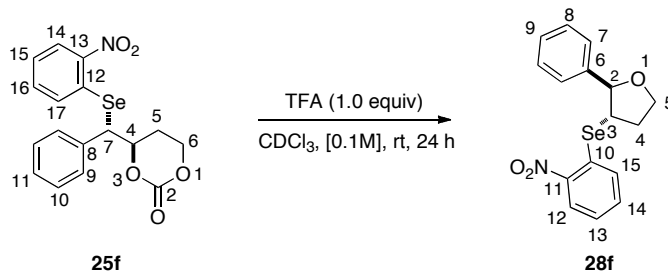

Following General Procedure 4, to an oven-dried NMR tube was added trifluoroacetic acid (3.9  $\mu\text{L}$ , 0.051 mmol, 1.0 equiv), and  $\text{CDCl}_3$  (0.1 mL). A solution of carbonate **25f** (21.3 mg, 0.051 mmol) in  $\text{CDCl}_3$  (0.41 mL) was added and the tube was secured with a septum. The resulting solution was shaken and then allowed to sit for 24 h at room temperature.  $^1\text{H}$  NMR spectroscopy analysis of the reaction mixture showed 36% conversion to product by comparison of the integration of protons HC(4) of the carbonate **25f** and HC(2) of ether **28f**. The mixture was quenched with 10  $\mu\text{L}$  of triethylamine and then was concentrated on the rotavap (30  $^\circ\text{C}$ , 30 mm Hg). The crude residue was purified by chromatography (silica gel, 25 mm x 11 cm column, hexanes/EtOAc, 85/15) and the enantiomeric composition of the product was determined by CSP-SFC analysis of the product.

SFC: (2*R*,3*S*)-**28f**,  $t_R$  8.26 min (93.6%); (2*S*,3*R*)-**28f**,  $t_R$  11.56 min (6.4%), (Chiralpak AD, 125 bar, 12% MeOH in  $\text{CO}_2$ , 2.5 mL/min, 220 nm, 40  $^\circ\text{C}$ )

**Table 2, entry 7**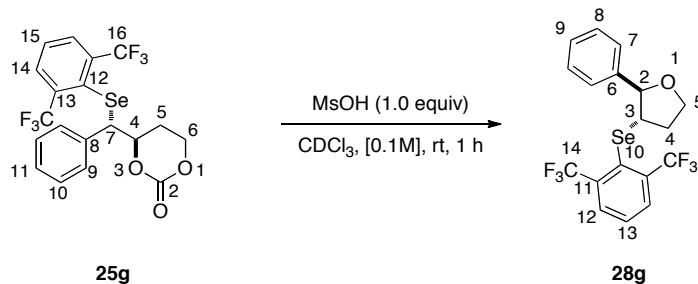

To an oven-dried Schlenk flask was added methanesulfonic acid (6.7  $\mu\text{L}$ , 0.103 mmol, 1.0 equiv), and  $\text{CDCl}_3$  (0.5 mL). A solution of carbonate **25g** (50.0 mg, 0.103 mmol) in  $\text{CDCl}_3$  (0.53 mL) was added and the flask was secured with a septum. The resulting solution was stirred for 2 h at room temperature.  $^1\text{H}$  NMR spectroscopy analysis of the reaction mixture showed 100% conversion of **25g** to **28g**. The mixture was quenched with 14  $\mu\text{L}$  of triethylamine and then was concentrated on the rotavap (30  $^\circ\text{C}$ , 30 mm Hg). The crude residue was purified by chromatography (silica gel, 25 mm x 9.5 cm column, hexanes/EtOAc, 95/5) and the enantiomeric composition of the product was determined by CSP-SFC analysis of the product.

Data for **28g**: $^1\text{H}$  NMR: (500 MHz,  $\text{CDCl}_3$ )

7.91 (d,  $J = 8.0$  Hz, 2 H, HC(12)), 7.58 (t,  $J = 8.0$  Hz, 1 H, HC(13)), 7.26-7.15 (m, 5 H), 4.94 (d,  $J = 5.4$  Hz, 1 H, HC(2)), 4.17-4.13 (m, 1 H), 4.08 (dd,  $J = 15.5, 8.0$  Hz, 1 H), 3.78 (dd,  $J = 12.5, 6.0$  Hz, 1H), 2.28-2.20 (m, 1 H), 2.04-1.98 (m, 1 H).

 $^{13}\text{C}$  NMR: (125 MHz,  $\text{CDCl}_3$ )

140.8, 137.9 (q,  $J = 29$  Hz, C(11)), 130.3 (q,  $J = 5.9$  Hz, C(12)), 129.5, 128.3, 127.7, 125.8, 125.5, 123.19 (q,  $J = 273$  Hz, C(14)), 86.2 (C(2)), 67.6 (C(5)), 49.9 (C(3)), 32.9 (C(4)).

$^{19}\text{F}$  NMR: (470 MHz,  $\text{CDCl}_3$ )

-58.3 ( $\text{F}_3\text{C}(14)$ ).

IR: ( $\text{NaCl}$  plates,  $\text{CH}_2\text{Cl}_2$ )

3035 (w), 2917 (w), 2872 (w), 1582 (w), 1493 (w), 1454 (w), 1423 (w), 1332 (m), 1288 (s), 1201 (m), 1142 (s), 1114 (m), 1066 (m), 1028 (w), 813 (w), 759 (w), 736 (w), 700 (w), 675 (m).

MS: (EI, 70 eV)

440.1 (15.7,  $\text{M}^+$ ), 336.0 (17.0), 335.0 (11.0), 334.0 (100.0), 332.0 (48.0), 331.0 (16.1), 330.0 (17.1), 293.0 (21.0), 291.0 (10.3), 274.0 (16.8), 147.1 (94.8), 146.1 (80.5), 121.0 (18.7), 117.1 (32.7), 116.1 (14.4), 115.1 (44.2), 105.0 (93.2), 91.1 (84.4), 86.0 (41.5), 84.0 (65.3), 77.1 (56.9), 65.0 (10.2).

HRMS: calcd for  $\text{C}_{18}\text{H}_{14}\text{F}_6\text{OSe}$ : 440.0114, found: 440.0122

TLC:  $R_f$  0.30 (hexanes/EtOAc, 95/5) [UV]

Opt. Rot.:  $[\alpha]_{\text{D}}^{24}$  19.9 ( $c = 0.45$ ,  $\text{CHCl}_3$ )

SFC: (*2R,3S*)-**28g**,  $t_R$  17.06 min (93.7%); (*2S,3R*)-**28g**,  $t_R$  19.57 min (6.3%), (Chiralpak Regis WhelkO1, 125 bar, 1% MeOH in  $\text{CO}_2$ , 1.5 mL/min, 220 nm, 40 °C)

## Olefin Transfer Experiments

## Scheme 12a

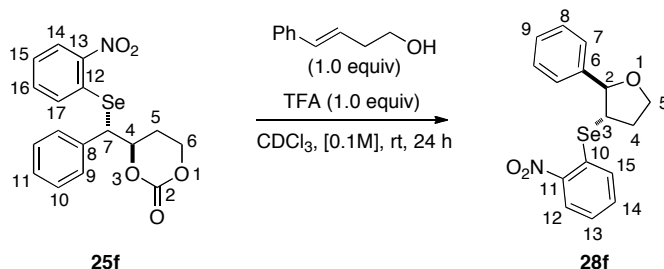

Following General Procedure 5, to an oven-dried NMR tube was added trifluoroacetic acid (3.9  $\mu\text{L}$ , 0.051 mmol, 1.0 equiv), and CDCl<sub>3</sub> (0.1 mL). A solution of carbonate **25f** (20.0 mg, 0.051 mmol) and olefin (*E*)-**29** (7.50 mg, 0.051 mmol, 1.0 equiv) in CDCl<sub>3</sub> (0.41 mL) was added and the tube was secured with a septum. The resulting solution was shaken and then allowed to sit for 24 h at room temperature. <sup>1</sup>H NMR spectroscopy analysis of the reaction mixture showed 21% conversion to product by comparison of the integration of protons HC(5) of the carbonate **25f** and HC(2) of ether **28f**. The mixture was quenched with 10  $\mu\text{L}$  of triethylamine and then was concentrated on the rotavap (30 °C, 30 mm Hg). The crude residue was purified by chromatography (silica gel, 25 mm x 11 cm column, hexanes/EtOAc, 85/15) and the enantiomeric composition of the product was determined by CSP-SFC analysis of the product.

SFC: (*2R,3S*)-**28f**,  $t_R$  8.26 min (87.9%); (*2S,3R*)-**28f**,  $t_R$  11.56 min (12.1%), (Chiralpak AD, 125 bar, 12% MeOH in CO<sub>2</sub>, 2.5 mL/min, 220 nm, 40 °C)

## Scheme 12b

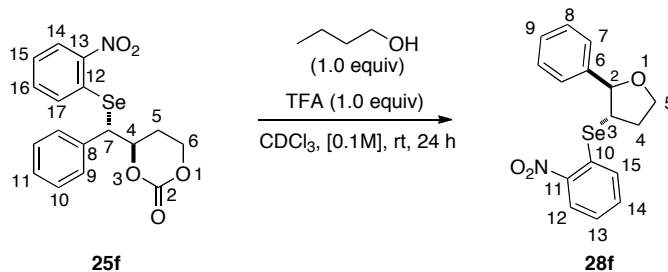

Following General Procedure 5, to an oven-dried NMR tube was added trifluoroacetic acid (3.9  $\mu\text{L}$ , 0.051 mmol, 1.0 equiv), and CDCl<sub>3</sub> (0.1 mL). A solution of carbonate **25f** (20.0 mg, 0.051 mmol) in CDCl<sub>3</sub> (0.41 mL) followed by 1-butanol were added and the tube was secured with a septum. The resulting solution was shaken and then allowed to sit for 24 h at room temperature. <sup>1</sup>H NMR spectroscopy analysis of the reaction mixture showed trace conversion to product by comparison of the integration of protons HC(4) of the carbonate **25f** and HC(2) of ether **28f**. The mixture was quenched with 10  $\mu\text{L}$  of triethylamine and then was concentrated on the rotavap (30 °C, 30 mm Hg). The crude residue was purified by chromatography (silica gel, 25 mm x 11 cm column, hexanes/EtOAc, 85/15) and the enantiomeric composition of the product was determined by CSP-SFC analysis of the product.

SFC: (2*R*,3*S*)-**28f**,  $t_R$  8.26 min (94.8%); (2*S*,3*R*)-**28f**,  $t_R$  11.56 min (5.2%), (Chiralpak AD, 125 bar, 12% MeOH in CO<sub>2</sub>, 2.5 mL/min, 220 nm, 40 °C)

## Scheme 12c

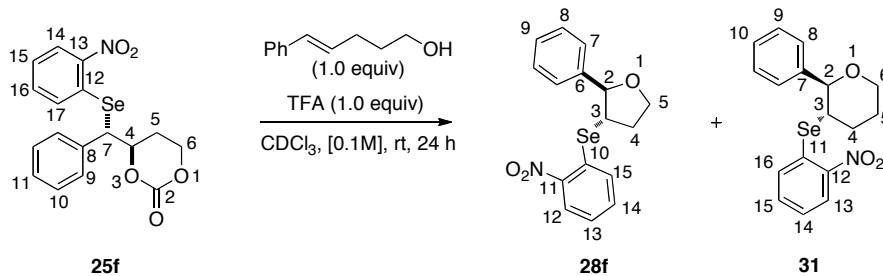

Following General Procedure 5, to an oven-dried NMR tube was added trifluoroacetic acid (3.9  $\mu\text{L}$ , 0.051 mmol, 1.0 equiv), and  $\text{CDCl}_3$  (0.1 mL). A solution of carbonate **25f** (20.0 mg, 0.051 mmol) and olefin (*E*)-**30** (8.30 mg, 0.051 mmol, 1.0 equiv) in  $\text{CDCl}_3$  (0.41 mL) and the tube was secured with a septum. The resulting solution was shaken and then allowed to sit for 24 h at room temperature.  $^1\text{H}$  NMR spectroscopy analysis of the reaction mixture showed trace conversion to products **28f** and **31**. The mixture was quenched with 10  $\mu\text{L}$  of triethylamine and then was concentrated on the rotavap. The crude residue was purified by chromatography (silica gel, 25 mm x 11 cm column, hexanes/EtOAc, 85/15) and the product was isolated as a 2:1 mixture of **28f** to **31**. The enantiomeric composition of the products **28f** and **31** were determined by CSP-SFC analysis of the product.

SFC: (*2R,3S*)-**28f**,  $t_R$  15.5 min (96.3%); (*2S,3R*)-**28f**,  $t_R$  18.2 min (3.7%), (Chiralpak Regis WhelkO1, 125 bar, 10% MeOH in  $\text{CO}_2$ , 1.5 mL/min, 220 nm, 40  $^\circ\text{C}$ )  
 (*2R,3S*)-**31**,  $t_R$  13.7 min (50.9%); (*2S,3R*)-**31**,  $t_R$  14.6 min (49.1%), (Chiralpak Regis WhelkO1, 125 bar, 10% MeOH in  $\text{CO}_2$ , 1.5 mL/min, 220 nm, 40  $^\circ\text{C}$ )

**Preparation of Allyl-2-nitrophenylselenide (33) (Scheme 13)**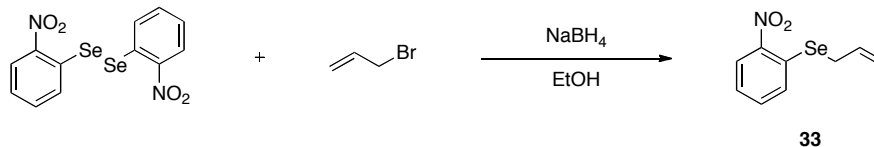

To an oven-dried, 100-mL, Schlenk flask equipped with a magnetic stir bar, was added 1,2-bis(2-nitrophenyl)diselane (3.71 g, 9.20 mmol) and EtOH (46 mL). The flask was cooled to 0 °C (the ice bath temperature) and sodium borohydride (869 mg, 22.9 mmol, 2.5 equiv) was added to the yellow suspension. Within 5 min the mixture turned dark brown. The solution was stirred at 0 °C for 2 h and then allyl bromide (1.7 mL, 19.3 mmol, 2.1 equiv) was added dropwise at 0 °C whereupon the reaction turned yellow. After stirring at 0 °C for 2.5 h, the ice bath was removed and the solution stirred at room temperature for 2.5 h. The reaction mixture was transferred to a 500-mL separatory funnel with hexanes 100 mL and H<sub>2</sub>O (100 mL). The organic and the aqueous layers were separated and the aqueous layer was extracted with hexanes (3 x 150 mL). The combined organic extracts were dried over MgSO<sub>4</sub> filtered, concentrated on the rotavap (30 °C, 30 mm Hg) and dried under high vacuum to afford 3.0 g of **33** (67%) as a yellow solid.

**Data for 33:**

**mp:** 52-53 °C

**<sup>1</sup>H NMR:** (500 MHz, CDCl<sub>3</sub>)

8.28 (d, *J* = 8.0 Hz, 1 H), 7.54-7.50 (m, 2 H), 7.32 (t, *J* = 8.0 Hz, 1H), 6.02-5.93 (m, 1H), 5.33 (d, *J* = 17.0 Hz, 1H), 5.18 (d, *J* = 10.0 Hz, 1H), 3.61 (d, *J* = 7.50 Hz, 2H)

**<sup>13</sup>C NMR:** (125 MHz, CDCl<sub>3</sub>)

146.6, 133.5, 133.4, 132.3, 129.2, 126.3, 125.5, 119.1, 29.1.



$^{77}\text{Se}$ NMR: (114 MHz,  $\text{CDCl}_3$ )

377.0

IR: ( $\text{NaCl}$  plates,  $\text{CH}_2\text{Cl}_2$ )

3078 (w), 2978 (w), 2929 (w), 1632 (w), 1588 (m), 1564 (m), 1503 (s), 1450 (m), 1432 (m), 1404 (w), 1328 (s), 1303 (s), 1250 (m), 1195 (w), 1167 (w), 1149 (w), 1096 (m), 1036 (m), 985 (w), 917 (w), 851 (m), 780 (m), 727 (s), 702 (w), 677 (w), 646 (w), 532 (w), 521 (w), 507 (w)

MS: (EI, 70 eV)

242.9 (31.8,  $\text{M}^+$ ), 240.9 (15.0), 203.9 (11.2), 201.9 (68.9), 199.9 (31.4), 198.9 (10.1) 197.9 (11.7), 185.9 (34.6), 183.9 (17.3), 155.9 (24.6), 153.9 (11.9), 143.9 (12.1), 115.0 (10.4), 106.0 (100.0), 78.0 (33.5), 63.1 (14.6)

HRMS: calcd for  $\text{C}_9\text{H}_9\text{NO}_2\text{Se}$ : 242.9815, found: 242.9798

Analysis:  $\text{C}_9\text{H}_9\text{NO}_2\text{Se}$  (242.981)

Calcd: C, 44.64; H, 3.75; N, 5.78%

Found: C, 44.83; H, 3.60; N, 5.78%

### Preparation of *N*-(2-Nitrophenylselenenyl)succinimide (**34**) (Scheme 13)

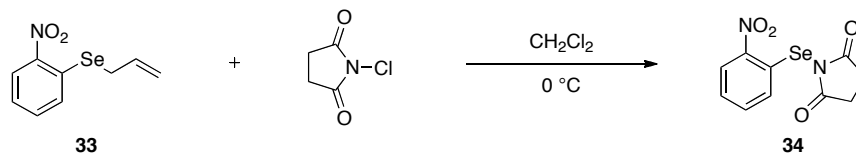

To an oven-dried, 25-mL, Schlenk flask equipped with a magnetic stir bar, was added *N*-chlorosuccinimide (689 mg, 5.20 mmol) and  $\text{CH}_2\text{Cl}_2$  (3.4 mL) and the flask was cooled to  $0\text{ }^\circ\text{C}$  (the ice bath temperature). A solution of **33** (1.50 g, 6.20 mmol, 1.2 equiv) in  $\text{CH}_2\text{Cl}_2$  (9.4 mL) was added and the solution was stirred at  $0\text{ }^\circ\text{C}$  for 2 h. The ice bath was removed and the

solution stirred at room temperature for 1 h. The reaction mixture was concentrated on the rotavap (30 °C, 30 mm Hg) to afford a greenish brown solid. The crude product was dissolved in 25 mL of hexanes and collected on a frit. The solid was washed with hexanes (100 mL) and anhydrous Et<sub>2</sub>O (75 mL) to afford a yellow solid. The product was further purified by recrystallization (CH<sub>2</sub>Cl<sub>2</sub>/hexanes) to afford 1.25 g (81%) of analytically pure **34** as a yellow solid.

Data for **34**:

mp: 212-214 °C (d)

<sup>1</sup>H NMR: (500 MHz, CDCl<sub>3</sub>)

8.37 (d, *J* = 8.0 Hz, 1 H), 7.63 (t, *J* = 7.5 Hz, 1 H), 7.45 (t, *J* = 7.5 Hz, 1 H), 7.07 (d, *J* = 8.0 Hz, 1 H), 3.04 (s, 4 H)

<sup>13</sup>C NMR: (125 MHz, CDCl<sub>3</sub>)

178.6, 143.5, 135.7, 135.3, 127.3, 126.2, 125.5, 29.7.

IR: (NaCl plates, CH<sub>2</sub>Cl<sub>2</sub>)

3302 (w), 2943 (w), 1759 (w), 1706 (s), 1590 (w), 1568 (w), 1512 (m), 1452 (w), 1423 (w), 1325 (m), 1298 (s), 1240 (m), 1151 (s), 1106 (w), 1034 (w), 1006 (w), 850 (w), 819 (w), 787 (w), 732 (m), 702 (w), 670 (w), 660 (w), 642 (w), 599 (w), 568 (w), 532 (w)

MS: (EI, 70 eV)

299.9 (29.0, M<sup>+</sup>), 297.9 (14.0), 253.9 (24.5), 251.9 (11.8), 201.9 (40.1), 199.9 (19.5), 185.9 (14.2), 155.9 (15.2), 143.9 (13.8), 106.0 (100.0), 78.0 (36.8), 63.1 (21.3), 56.1 (10.9), 55.1 (15.1)

HRMS: calcd for C<sub>10</sub>H<sub>8</sub>N<sub>2</sub>O<sub>4</sub>Se: 299.9649, found: 299.9638

Analysis: C<sub>10</sub>H<sub>8</sub>N<sub>2</sub>O<sub>4</sub>Se (299.965)

Calcd: C, 40.15; H, 2.70; N, 9.36; Se, 26.40%

Found: C, 40.20; H, 2.46; N, 9.12; Se, 24.75%

### Catalytic Selenoetherification with *N*-Phenylseleneny succinimide (**6**)

#### Preparation of (+/-)-2-Phenyl-3-(phenylseleno)oxolane (**28a**)

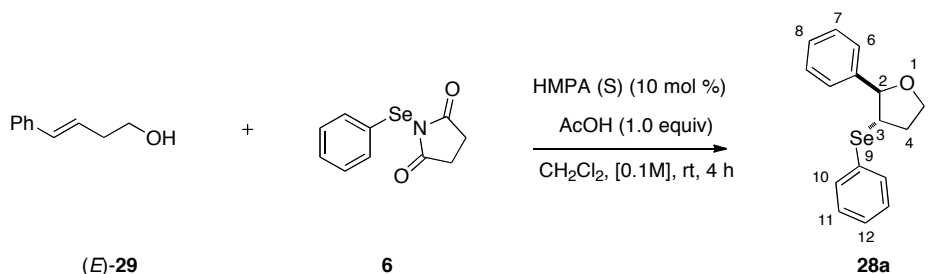

An oven-dried, 10-mL Schlenk flask equipped with a magnetic stir bar was charged with HMPA(S) (19.5 mg, 0.100 mmol, 0.1 equiv) and (*E*)-**29** (148 mg, 1.00 mmol). *N*-Phenylseleneny succinimide (**6**) (279 mg, 1.10 mmol, 1.1 equiv) was added in the glove box. The flask was attached to the manifold and CH<sub>2</sub>Cl<sub>2</sub> (10 mL) was added to it. AcOH (57.0 μL, 1.00 mmol, 1.0 equiv) was added to the reaction using a syringe and the solution was stirred at room temperature for 4 h. Then the reaction mixture was quenched with Et<sub>3</sub>N (140 μL, 1.00 mmol, 1.0 equiv) and concentrated on the rotavap (30 °C, 30 mm Hg). The crude residue was dissolved in EtOAc (20 mL) and filtered through a 1.5-inch pad of silica gel which was further eluted with EtOAc (150 mL). The filtrate was concentrated on the rotavap (30 °C, 30 mm Hg). The crude product was purified by column chromatography (silica gel, 25 mm x 31 cm column, hexanes/EtOAc, 96/4) to afford 263 mg (87%) of seleno ether **28a** as a colorless clear oil.

#### Data for 28a:

<sup>1</sup>H NMR: (500 MHz, CDCl<sub>3</sub>)

7.51 (d,  $J = 7.0$  Hz, 2 H), 7.34-7.24 (m, 8 H), 4.87 (d,  $J = 6.0$  Hz, 1H, HC(2)), 4.18 (dd,  $J = 13.7, 7.2$  Hz, 1 H, HC(5)), 4.07 (dd,  $J = 15.5, 7.5$  Hz, 1 H, HC(5)), 3.60 (dd,  $J = 13.5, 6.0$  Hz, 1H, HC(3)), 2.53-2.46 (m, 1 H, HC(4)), 2.18-2.12 (m, 1 H, HC(4)).

$^{13}\text{C}$  NMR: (125 MHz,  $\text{CDCl}_3$ )

141.2, 134.6, 129.0, 128.6, 128.3, 127.7, 127.6, 125.9, 86.0 (C(2)), 67.9 (C(5)), 47.6 (C(3)), 34.1 (C(4)).

IR: (NaCl plates, neat)

3059 (s), 3031 (s), 2973 (s), 2940 (s), 2869 (s), 1951 (w), 1880 (w), 1808 (w), 1738 (w), 1603 (m), 1579 (s), 1494 (s), 1477 (s), 1453 (s), 1438 (s), 1362 (m), 1348 (m), 1327 (m), 1302 (s), 1247 (m), 1209 (m), 1175 (s), 1064 (s), 1042 (s), 1024 (s), 1000 (m), 970 (s), 909 (s), 874 (w), 844 (w), 734 (s), 691 (s), 670 (s), 624 (m), 574 (w), 531 (w).

MS: (EI, 70 eV)

304.0 (34.7,  $\text{M}^+$ ), 302.0 (16.6), 198.0 (27.5), 196.0 (13.1), 183.0 (18.5), 157.0 (20.0), 155.0 (10.0), 147.1 (60.1), 146.1 (100.0), 145.1 (11.3), 118.1 (21.6), 117.1 (84.7), 116.1 (13.2), 115.1 (31.5), 105.0 (69.1), 104.1 (13.3), 91.1 (69.5), 78.1 (18.4), 77.0 (55.2), 51.0 (17.7).

HRMS: calcd for  $\text{C}_{16}\text{H}_{16}\text{OSe}$ : 304.0366, found: 304.0362

TLC:  $R_f$  0.25 (hexanes/EtOAc, 96/4) [UV]

**General Procedure 6. Catalytic Selenoetherification with 34 and Achiral Lewis Bases.****Table 3**

To an oven-dried NMR tube containing electrophile **34** (22.2 mg, 0.074 mmol, 1.10 equiv) was added a solution of olefin (*E*)-**29** (10.0 mg, 0.067 mmol), and the Lewis base (if indicated) (0.006 mmol, 0.10 equiv) in CDCl<sub>3</sub> (0.67 mL) under an ambient atmosphere. Acid (TFA or MsOH as indicated) (0.067 mmol, 1 equiv) was added and the tube was secured with a septum. The resulting solution was shaken and monitored periodically by <sup>1</sup>H NMR spectroscopy over 24 h. Note: For entries 7 and 6 in Table 3, HMPT and HMPA were added neat and not as a solution with olefin (*E*)-**29**. Additionally, the HMPT reaction was set up under an argon atmosphere. For entry 2, solution of olefin (*E*)-**29** (10.0 mg, 0.067 mmol), and the Lewis base (0.006 mmol, 0.10 equiv) in CDCl<sub>3</sub> (0.57 mL) was used and 100 μL of a stock solution (39 μL in 1 mL CDCl<sub>3</sub>) of AcOH was added

**General Procedure 7. Catalytic Selenoetherification with 34 and Chiral Lewis Bases.****Figure 2 and Figure S1**

To an oven-dried NMR tube containing electrophile **34** (22.2 mg, 0.074 mmol, 1.10 equiv) was added a solution of olefin (*E*)-**29** (10.0 mg, 0.067 mmol), and the Lewis base (0.013 mmol, 0.20 equiv) in CDCl<sub>3</sub> (0.67 mL) under an ambient atmosphere. TFA (5.2 μL, 0.067 mmol, 1 equiv) was added and the tube was secured with a septum. The resulting solution was shaken and monitored periodically by <sup>1</sup>H NMR spectroscopy over 24 h. After the time indicated in the Figure for a particular Lewis base, the reaction was quenched with Et<sub>3</sub>N (10 μL) and concentrated on the rotavap (30 °C, 30 mm Hg). The crude residue was purified by chromatography (silica gel, 25 mm x 8 cm column, hexanes/EtOAc, 85/15). The enantiomeric

composition of the product was determined by CSP-SFC analysis of the product.

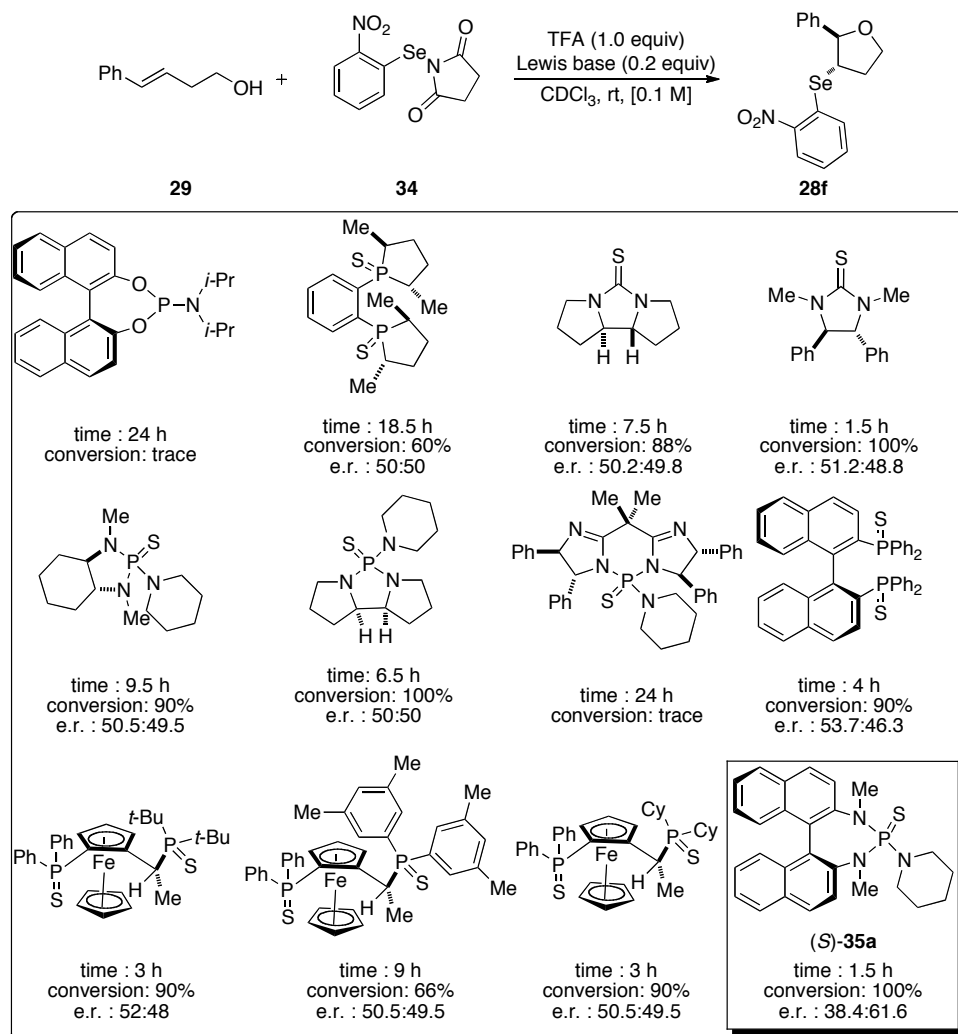

**Figure S1** Chiral Lewis base survey with *N*-(2-nitrophenyl)succinimide.

**Catalytic Selenoetherification with NPSS (6) and Chiral Lewis Base (R)-35a.**

To an oven-dried NMR tube containing NPSS (18.8 mg, 0.074 mmol, 1.10 equiv) was added a solution of olefin (*E*)-**29** (10.0 mg, 0.067 mmol), and thiophosphoramidate (**R**)-**35a** (6.20 mg, 0.013 mmol, 0.20 equiv) in CDCl<sub>3</sub> (0.57 mL) under an argon atmosphere. 100 μL of a stock solution (39 μL in 1 mL CDCl<sub>3</sub>) of AcOH was added. The resulting solution was shaken and monitored periodically by <sup>1</sup>H NMR spectroscopy, which showed 60% conversion to product over 3 h. The reaction was quenched with Et<sub>3</sub>N (10 μL) and concentrated on the rotavap (30 °C, 30 mm Hg). The crude residue was purified by chromatography (silica gel, 25 mm x 8 cm column, hexanes/EtOAc, 96/4). The enantiomeric composition of the product was determined by CSP-SFC analysis of the product.

HPLC: t<sub>R</sub> 8.7 min (45.4%); t<sub>R</sub> 10.4 min (54.6%), (Chiralpak Regis WhelkO1, 95:5, hexanes/*i*-PrOH, 1.0 mL/min, 220 nm, 25 °C)





The crude residue was purified by column chromatography (silica gel, 25 mm x 22 cm column, hexanes/EtOAc, 85/15) to afford 588 mg of thiophosphoramidate (*R*)-**35m** (85%) as a white solid. The e.r. (>99:1) of the (*R*)-**35m** is assumed to be the same as that of its precursor, namely the carbamate of (*R*)-BINAM precursor.

Data for (*R*)-**35m**:

mp: 255-256 °C (d)

<sup>1</sup>H NMR: (500 MHz, CDCl<sub>3</sub>)

7.99 (d, *J* = 9.0 Hz, 1 H), 7.96 (d, *J* = 9.0 Hz, 1H), 7.92 (d, *J* = 8.0 Hz, 1 H), 7.88 (d, *J* = 8.0 Hz, 1 H), 7.66 (d, *J* = 9.0 Hz, 1 H), 7.62 (d, *J* = 8.5 Hz, 1 H), 7.45 (t, *J* = 7.0 Hz, 1H), 7.38 (t, *J* = 7.5 Hz, 1H), 7.30-7.24 (m, 2 H), 7.15 (t, *J* = 7.5 Hz, 1 H), 7.06 (d, *J* = 8.5 Hz, 1H), 3.55 (br s, 4H), 3.14 (d, *J* = 12 Hz, 3H), 3.11 (br s, 4H), 3.01 (d, *J* = 12.5 Hz, 3H).

<sup>13</sup>C NMR: (125 MHz, CDCl<sub>3</sub>)

142.6 (d, <sup>2</sup>*J*<sub>C-P</sub> = 4.5 Hz), 141.4, 132.5, 132.3, 131.4, 131.3, 129.6, 129.5, 129.1, 128.1, 128.0, 127.8, 127.1 (two overlapping peaks), 126.3, 126.0, 125.5, 124.9, 123.5, 122.0 (d, <sup>2</sup>*J*<sub>C-P</sub> = 2.8 Hz), 67.4 (d, <sup>2</sup>*J*<sub>C-P</sub> = 5.5 Hz), 46.4, 37.9 (d, <sup>2</sup>*J*<sub>C-P</sub> = 9.1 Hz), 35.4 (d, <sup>2</sup>*J*<sub>C-P</sub> = 4.5 Hz).

<sup>31</sup>P NMR: (202 MHz, CDCl<sub>3</sub>)

87.7

IR: (NaCl plates, CH<sub>2</sub>Cl<sub>2</sub>)

3049 (w), 2960 (w), 2894 (w), 2850 (w), 1618 (w), 1593 (w), 1506 (m), 1467 (w), 1447 (w), 1429 (w), 1360 (w), 1329 (m), 1294 (w), 1273 (m), 1255 (m), 1158 (w), 1145 (w), 1129 (m), 1114 (m), 1084 (m), 1024 (w), 964 (s), 933 (s), 866 (w), 820

(s), 751 (m), 736 (m), 720 (s), 701 (m), 687 (w), 667 (w), 652 (w), 560 (w), 536 (w).

MS: (EI, 70 eV)

460.2 (18.3), 459.2 (63.2, M<sup>+</sup>), 375.1 (10.0), 374.1 (40.8), 373.1 (19.9), 342.1 (25.3), 341.1 (100.0), 311.2 (12.2), 281.1 (33.3), 280.1 (10.8), 84.0 (12.5).

HRMS: calcd for C<sub>26</sub>H<sub>26</sub>N<sub>3</sub>OPS: 459.1534, found: 459.1547

TLC: R<sub>f</sub> 0.23 (hexanes/EtOAc, 85/15) [UV]

Opt. Rot.: [α]<sub>D</sub><sup>24</sup> -358.6 (c = 1.15, CHCl<sub>3</sub>)

Analysis: C<sub>26</sub>H<sub>26</sub>N<sub>3</sub>OPS (459.1534)

Calcd: C, 67.95; H, 5.70 N, 9.14%

Found: C, 67.91; H, 5.77 N, 8.94%

### Optimization of Catalytic Selenoetherification with (*R*)-**35m**.

#### Table 4, entry 1

To an oven-dried NMR tube containing electrophile **34** (22.2 mg, 0.074 mmol, 1.10 equiv) was added a solution of (*E*)-**29** (10.0 mg, 0.067 mmol), and (*R*)-**35m** (3.1 mg, 0.006 mmol, 0.10 equiv) in CDCl<sub>3</sub> (0.67 mL) under an ambient atmosphere. MsOH (4.4 μL, 0.067 mmol, 1 equiv) was added and the tube was secured with a septum. The resulting solution was shaken and monitored periodically by <sup>1</sup>H NMR spectroscopy which showed complete conversion of (*E*)-**29** to **28f** in 20 min. The reaction was quenched with Et<sub>3</sub>N (10 μL) and concentrated on the rotavap (30 °C, 30 mm Hg). The crude residue was purified by chromatography (silica gel, 25 mm x 8 cm column, hexanes/EtOAc, 85/15). The enantiomeric composition of the product was determined by CSP-SFC analysis of the product.

SFC: (2*R*,3*S*)-**28f**,  $t_R$  8.26 min (68%); (2*S*,3*R*)-**28f**,  $t_R$  11.56 min (32%), (Chiralpak AD, 125 bar, 12% MeOH in CO<sub>2</sub>, 2.5 mL/min, 220 nm, 40 °C

#### Table 4, entry 2

To an oven-dried, 10 mL, Schlenk flask was added electrophile **34** (22.2 mg, 0.074 mmol, 1.10 equiv), olefin (*E*)-**29** (10.0 mg, 0.067 mmol), thiophosphoramidate (*R*)-**35m** (3.10 mg, 0.006 mmol, 0.10 equiv) and CDCl<sub>3</sub> (0.67 mL). The flask was cooled to -12 °C using a Cryocool, MsOH (4.4 μL, 0.067 mmol, 1 equiv) was added and solution was stirred at -12 °C for 24 h. The reaction was quenched with Et<sub>3</sub>N (10 μL) at -12 °C and analyzed by <sup>1</sup>H NMR spectroscopy, which showed 50% conversion of (*E*)-**29** to **28f**. The reaction mixture was concentrated on the rotavap and the crude residue was purified by chromatography (silica gel, 25 mm x 8 cm column, hexanes/EtOAc, 85/15). The enantiomeric composition of the product was determined by CSP-SFC analysis of the product.

SFC: (2*R*,3*S*)-**28f**,  $t_R$  8.26 min (73%); (2*S*,3*R*)-**28f**,  $t_R$  11.56 min (27%), (Chiralpak AD, 125 bar, 12% MeOH in CO<sub>2</sub>, 2.5 mL/min, 220 nm, 40 °C

#### Table 4, entry 3

To an oven-dried, 10 mL, Schlenk flask was added electrophile **34** (44.4 mg, 0.15 mmol, 1.10 equiv), thiophosphoramidate (*R*)-**35m** (12.4 mg, 0.03 mmol, 0.20 equiv) and CDCl<sub>3</sub> (1.34 mL). MsOH (8.8 μL, 0.13 mmol, 1.00 equiv) was added and then a solution of olefin (*E*)-**29** (20.0 mg, 0.13 mmol) in CDCl<sub>3</sub> (0.67 mL) was added over 14 h using a syringe pump. The reaction was quenched with Et<sub>3</sub>N (10 μL), concentrated on the rotavap and the crude residue was purified by chromatography (silica gel, 25 mm x 8 cm column, hexanes/EtOAc, 85/15). The

enantiomeric composition of the product was determined by CSP-SFC analysis of the product.

SFC: (2*R*,3*S*)-**28f**,  $t_R$  8.26 min (69%); (2*S*,3*R*)-**28f**,  $t_R$  11.56 min (31%), (Chiralpak AD, 125 bar, 12% MeOH in CO<sub>2</sub>, 2.5 mL/min, 220 nm, 40 °C

### General Procedure 8. Catalytic Asymmetric Selenoetherification with (*R*)-**35m** and **34**.

#### (2*R*,3*S*)-[3-(2-Nitrophenyl)selenenyl]-2-phenyloxolane (**28f**) (Table 5, entry 1)

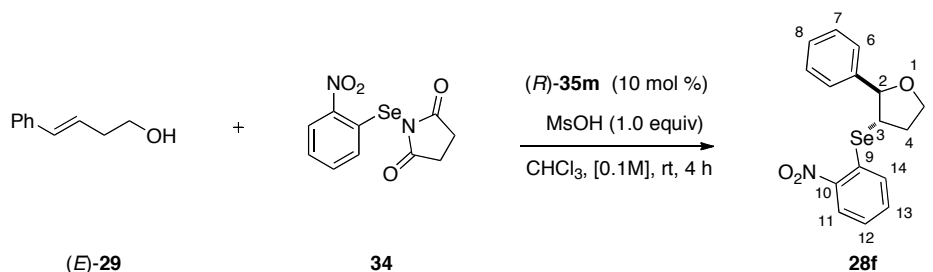

An oven-dried, 10-mL Schlenk flask equipped with a magnetic stir bar was charged with *N*-2-nitrophenylselenenyl succinimide **34** (329 mg, 1.10 mmol, 1.1 equiv), thiophosphoramidate (*R*)-**35m** (45.9 mg, 0.100 mmol, 0.1 equiv) and CHCl<sub>3</sub> (5 mL). A solution of olefin (*E*)-**29** (148 mg, 1.00 mmol) in CHCl<sub>3</sub> (5 mL) was added under an atmosphere of nitrogen. Finally MsOH (65 μL, 1.00 mmol, 1.0 equiv) was added to the reaction using a syringe and the yellow solution was stirred at room temperature for 4 h. Then the reaction mixture was quenched with Et<sub>3</sub>N (140 μL, 1.00 mmol, 1.0 equiv) and was concentrated on the rotavap (30 °C, 30 mm Hg). The crude residue was dissolved in EtOAc (20 mL) and filtered through a 1.5-inch pad of silica gel which was further eluted with EtOAc (150 mL). The filtrate was concentrated on the rotavap (30 °C, 30 mm Hg). The crude product was purified by column chromatography (silica gel, 25 mm x 31 cm column, hexanes/EtOAc, 92/8) to afford 338 mg (97%) of seleno ether **28f** as a yellow oil. Note: The racemate of **28f** was prepared following General Procedure 6 with Ph<sub>3</sub>P(S) as the catalyst and TFA as the Brønsted acid.

Data for 28f:<sup>1</sup>H NMR: (500 MHz, CDCl<sub>3</sub>)

8.24 (dd,  $J = 8.2, 2.0$  Hz, 1 H, HC(11)), 7.41 (d,  $J = 7.0$  Hz, 2 H), 7.35-7.25 (m, 6 H), 4.86 (d,  $J = 6.5$  Hz, 1 H, HC(2)), 4.31-4.27 (m, 1 H, HC(5)), 4.09 (dd,  $J = 16.0, 7.5$  Hz, 1 H, HC(5)), 3.72 (dd,  $J = 14.5, 6.5$  Hz, 1 H, HC(3)), 2.79-2.72 (m, 1 H, HC(4)), 2.23-2.17 (m, 1 H, HC(4)).

<sup>13</sup>C NMR: (125 MHz, CDCl<sub>3</sub>)

146.9, 140.8, 133.4, 132.8, 130.0, 128.6, 128.0, 126.3, 125.9, 125.7, 85.4 (C(2)), 67.9 (C(5)), 45.8 (C(3)), 34.0 (C(4)).

<sup>77</sup>Se NMR: (114 MHz, CDCl<sub>3</sub>)

423.9

IR: (NaCl plates, CH<sub>2</sub>Cl<sub>2</sub>)

3085 (w), 3064 (w), 3028 (w), 2972 (w), 2936 (w), 2867 (w), 1590 (m), 1566 (m), 1513 (s), 1451 (m), 1331 (s), 1304 (s), 1252 (m), 1098 (m), 1085 (w), 1067 (m), 1038 (m), 973 (w), 909 (w), 852 (w), 759 (m), 730 (s), 701 (s), 646 (w).

MS: (EI, 70 eV)

349.0 (12.9, M<sup>+</sup>), 243.0 (11.6), 201.9 (12.3), 186.0 (55.3), 184.0 (27.4), 182.0 (11.7), 163.1 (22.8), 156.0 (12.5), 147.1 (69.6), 146.1 (100.0), 117.1 (19.8), 116.1 (10.1), 115.1 (29.1), 106.0 (36.0), 105.0 (59.6), 91.1 (71.0), 78.0 (15.5), 77.1 (36.0).

HRMS: calcd for C<sub>16</sub>H<sub>15</sub>NO<sub>3</sub>Se: 349.0217, found: 349.0223TLC:  $R_f$  0.12 (hexanes/EtOAc, 92/8) [UV]Opt. Rot.:  $[\alpha]_D^{24}$  51.64 (c = 1.02, CHCl<sub>3</sub>)SFC: (2*R*,3*S*)-**28f**,  $t_R$  8.41 min (68.9%); (2*S*,3*R*)-**28f**,  $t_R$  11.60 min (31.1%), (Chiralpak

AD, 125 bar, 12% MeOH in CO<sub>2</sub>, 2.5 mL/min, 220 nm, 40 °C)

**Analysis:** C<sub>16</sub>H<sub>15</sub>NO<sub>3</sub>Se (349.0217)

Calcd: C, 55.18; H, 4.34; N, 4.02%

Found: C, 55.09; H, 4.32; N, 3.95%

**Preparation of (2*R*,3*S*)-3-(2-Nitrophenyl)selenenyl-2-phenyloxane (31) (Table 5, entry 2)**

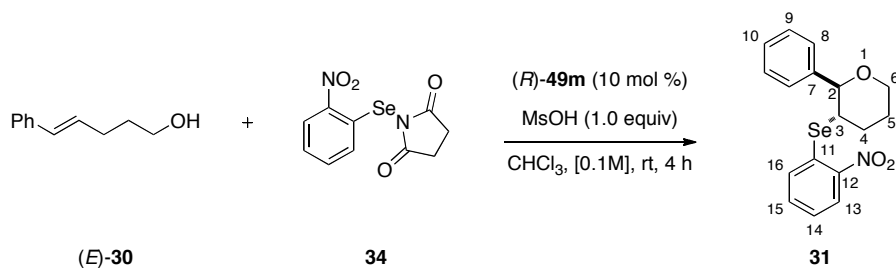

Following General Procedure 8, **34** (329 mg, 1.10 mmol, 1.1 equiv), (*R*)-**35m** (45.9 mg, 0.100 mmol, 0.1 equiv), (*E*)-**30** (162 mg, 1.00 mmol), MsOH (65.0  $\mu$ L, 1.10 mmol, 1.0 equiv), and CHCl<sub>3</sub> (10 mL) were combined to yield after column chromatography (silica gel, 25 mm x 31 cm column, hexanes/EtOAc, 92/8) 312 mg (86%) of seleno ether **31** as a yellow solid. Note: The racemate of **31** was prepared following General Procedure 6 with Ph<sub>3</sub>P(S) as the catalyst and TFA as the Brønsted acid.

**Data for 31:**

**mp:** 75-76 °C

**<sup>1</sup>H NMR:** (500 MHz, CDCl<sub>3</sub>)

7.94 (d, *J* = 8.0 Hz, 1 H), 7.33 (d, *J* = 7.0 Hz, 2 H), 7.18-7.08 (m, 6 H), 4.37 (d, *J* = 10.5 Hz, 1 H, HC(2)), 4.17 (dd, *J* = 11.5, 4.5 Hz, 1 H, HC(6)), 3.65 (td, *J* = 11.5, 2.0 Hz, 1 H, HC(6)), 3.58-3.52 (m, 1 H, HC(3)), 2.45-2.42 (m, 1 H, HC(4)), 2.01-1.93 (m, 1H), 1.86 (ddd, *J* = 25, 12.5, 3.5 Hz, 1 H), 1.77 (d, *J* = 13.0 Hz, 1 H).

<sup>13</sup>C NMR: (125 MHz, CDCl<sub>3</sub>)

148.2, 139.6, 132.5, 131.5, 130.1, 128.1, 128.0, 127.2, 125.7, 125.4, 85.2 (C(2)),  
68.6 (C(6)), 45.7 (C(3)), 31.4 (C(4)), 27.6 (C(5)).

IR: (KBr pellets)

3092 (w), 3057 (w), 3034 (w), 2934 (m), 2851 (m), 1589 (s), 1565 (s), 1515 (s),  
1452 (s), 1434 (m), 1330 (s), 1304 (s), 1248 (s), 1182 (m), 1141 (m), 1098 (s), 1076  
(s), 1036 (s), 1024 (s), 962 (m), 938 (s), 910 (w), 881 (w), 852 (m), 781 (m), 758  
(s), 728 (s), 701 (s), 646 (m), 533 (m).

MS: (EI, 70 eV)

363.0 (8.2, M<sup>+</sup>), 322.3 (13.5), 162.1 (11.3), 161.1 (100.0), 105.0 (24.5), 91.1 (61.6),  
77.1 (10.4), 71.1 (29.3), .

HRMS: calcd for C<sub>17</sub>H<sub>17</sub>NO<sub>3</sub>Se: 363.0374, found: 363.0360

TLC: R<sub>f</sub> 0.17 (hexanes/EtOAc, 91/9) [UV]

Opt. Rot.: [α]<sub>D</sub><sup>24</sup> 62.04 (c = 1.95, CHCl<sub>3</sub>)

SFC: (2*S*,3*R*)-**31**, *t*<sub>R</sub> 24.86 min (25.1%); (2*R*,3*S*)-**31**, *t*<sub>R</sub> 26.09 min (74.9%), (Chiralpak  
AD, 125 bar, 10% MeOH in CO<sub>2</sub>, 1.0 mL/min, 220 nm, 40 °C)

Analysis: C<sub>17</sub>H<sub>17</sub>NO<sub>3</sub>Se (363.0374)

Calcd: C, 56.36; H, 4.73; N, 3.87%

Found: C, 56.04; H, 4.60; N, 3.92%

**Preparation of (1*S*,2*R*)-[1-[(2-Nitrophenyl)seleno]-3-phenylpropyl]oxolane (**37**) and (2*R*,3*S*)-3-(2-Nitrophenyl)selenenyl-2-(2-phenylethyl)oxane (**38**) (Table 5, entry 3)**

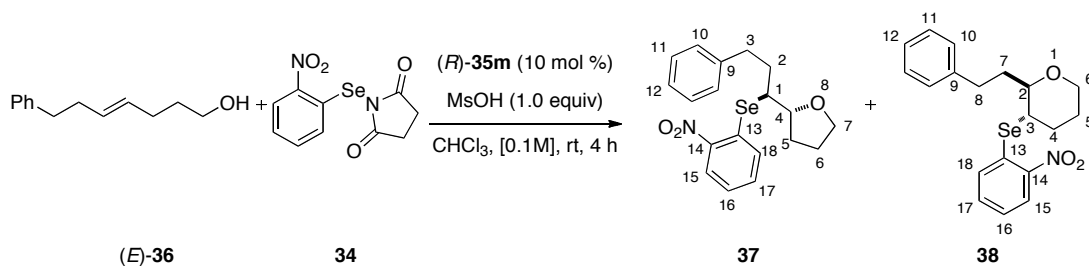

Following General Procedure 8, **34** (329 mg, 1.10 mmol, 1.1 equiv), (*R*)-**35m** (45.9 mg, 0.100 mmol, 0.1 equiv), (*E*)-**36** (190 mg, 1.00 mmol), MsOH (65.0  $\mu$ L, 1.10 mmol, 1.0 equiv), and CHCl<sub>3</sub> (10 mL) were combined to yield after column chromatography (silica gel, 25 mm x 30 cm column, hexanes/EtOAc, 92.5/7.5) and three sets of fractions were collected. These fractions contained pure **37** (199 mg, yellow oil), mixture of **37** and **38** (99.2 mg, yellow oil), and pure **38** (69.7 mg, yellow oil). The combined yield of the **37** and **38** was 94% (368 mg). Note: The racemates of **37** and **38** were prepared following General Procedure 6 with Ph<sub>3</sub>P(S) as the catalyst and TFA as the Brønsted acid.

**Data for **37**:**

**<sup>1</sup>H NMR:** (500 MHz, CDCl<sub>3</sub>)

8.18 (dd, *J* = 8.0, 1.0 Hz, 1 H), 7.68 (d, *J* = 7.5 Hz, 1 H), 7.39 (td, *J* = 8.5, 1.5 Hz, 1 H), 7.30-7.25 (m, 3 H), 7.18 (t, *J* = 7.0 Hz, 1 H), 7.13 (d, *J* = 7.0 Hz, 2 H), 4.15 (dd, *J* = 13.5, 7.0 Hz, 1 H), 3.85 (dd, *J* = 15.5, 7.0 Hz, 1 H), 3.76 (dd, *J* = 13.5, 7.5 Hz, 1 H), 3.57-3.53 (m, 1 H), 2.95 (ddd, *J* = 14.0, 9.0, 5.5 Hz, 1 H), 2.82-2.77 (m, 1 H), 2.15-2.08 (m, 1 H), 2.05-1.84 (m, 4 H), 1.78-1.70 (m, 1 H).



$^{13}\text{C}$  NMR: (125 MHz,  $\text{CDCl}_3$ )

148.1, 141.1, 133.2, 132.6, 131.4, 128.5, 128.4, 126.0, 125.9, 125.6, 81.5, 68.5, 48.7, 33.8, 33.7, 29.6, 26.0.

IR: (NaCl plates,  $\text{CH}_2\text{Cl}_2$ )

3085 (w), 3057 (w), 3028 (w), 2972 (w), 2943 (w), 2859 (w), 1589 (m), 1566 (m), 1514 (s), 1454 (m), 1332 (s), 1303 (m), 1252 (w), 1096 (w), 1057 (m), 1035 (m), 852 (w), 783 (w), 748 (w), 730 (m), 700 (m), 645 (w).

MS: (EI, 70 eV)

391.1 (6.9,  $\text{M}^+$ ), 189.1 (39.5), 171.1 (12.7), 129.1 (21.2), 117.1 (13.3), 105.1 (11.6), 97.1 (15.8), 91.1 (74.2), 71.1 (100.0) .

HRMS: calcd for  $\text{C}_{19}\text{H}_{21}\text{NO}_3\text{Se}$ : 391.0687, found: 391.0699

TLC:  $R_f$  0.15 (hexanes/EtOAc, 92.5/7.5) [UV]

Opt. Rot.:  $[\alpha]_D^{24} - 85.9$  ( $c = 2.01$ ,  $\text{CHCl}_3$ )

SFC: (2*R*,3*S*)-**37**,  $t_R$  19.56 min (78.8%); (2*S*,3*R*)-**37**,  $t_R$  20.70 min (21.2%), (Chiralpak AD, 125 bar, 10% MeOH in  $\text{CO}_2$ , 1.0 mL/min, 220 nm, 40 °C)

Analysis:  $\text{C}_{19}\text{H}_{21}\text{NO}_3\text{Se}$  (391.0687)

Calcd: C, 58.46; H, 5.42; N, 3.59%

Found: C, 58.55; H, 5.38; N, 3.64%

Data for **38**:

$^1\text{H}$  NMR: (500 MHz,  $\text{CDCl}_3$ )

8.19 (dd,  $J = 8.0, 1.0$  Hz, 1 H), 7.61 (d,  $J = 8.5$  Hz, 1 H), 7.49 (td,  $J = 7.5, 1.5$  Hz, 1 H), 7.32 (t,  $J = 8.0$  Hz, 1 H), 7.27-7.24 (m, 2 H), 7.18-7.14 (m, 3 H), 4.09-4.07 (m,

1 H, HC(6)), 3.49 (td,  $J = 11.5, 2.5$  Hz, 1 H, HC(6)), 3.38 (td,  $J = 8.0, 2.0$  Hz, 1 H, HC(2)), 3.35-3.30 (m, 1 H, HC(3)), 2.84 (ddd,  $J = 14.0, 10.0, 4.5$  Hz, 1 H, HC(8)), 2.66 (ddd,  $J = 16.5, 9.5, 7.0$  Hz, 1 H, HC(8)), 2.31-2.29 (m, 1 H), 2.24-2.17 (m, 1 H), 1.85-1.66 (m, 4 H).

$^{13}\text{C}$  NMR: (125 MHz,  $\text{CDCl}_3$ )

148.2, 141.7, 133.2, 130.8, 130.7, 128.5, 128.3, 126.3, 126.1, 125.7, 80.2 (C(2)), 68.1 (C(6)), 44.1 (C(3)), 36.0, 32.0, 31.6, 27.8.

IR: (NaCl plates,  $\text{CH}_2\text{Cl}_2$ )

3085 (w), 3057 (w), 3021 (w), 2947 (m), 2848 (w), 2859 (w), 1590 (m), 1566 (m), 1515 (s), 1452 (m), 1331 (s), 1303 (m), 1248 (w), 1117 (w), 1098 (m), 1085 (m), 1060 (w), 1037 (m), 852 (w), 783 (w), 730 (s), 700 (m), 645 (w).

MS: (EI, 70 eV)

391.1 (7.5,  $\text{M}^+$ ), 189.1 (72.3), 171.1 (30.1), 143.1 (13.8), 135.1 (18.0), 129.1 (31.1), 117.1 (12.8), 105.1 (23.7), 91.1 (100.0), 71.1 (41.7), 57.2 (10.9), 55.1 (19.8).

HRMS: calcd for  $\text{C}_{19}\text{H}_{21}\text{NO}_3\text{Se}$ : 391.0687, found: 391.0682

TLC:  $R_f$  0.12 (hexanes/EtOAc, 92.5/7.5) [UV]

Opt. Rot.:  $[\alpha]_D^{24}$  23.6 ( $c = 0.33$ ,  $\text{CHCl}_3$ )

SFC: (2*S*,3*R*)-**38**,  $t_R$  11.48 min (14.9%); (2*R*,3*S*)-**38**,  $t_R$  18.66 min (85.1%), (Chiralpak OD, 125 bar, 12% MeOH in  $\text{CO}_2$ , 2.5 mL/min, 220 nm, 40 °C)

Analysis:  $\text{C}_{19}\text{H}_{21}\text{NO}_3\text{Se}$  (391.0687)

Calcd: C, 58.46; H, 5.42; N, 3.59%

Found: C, 58.35; H, 5.13; N, 3.62%

**Preparation of (1*S*,2*R*)-2-[2-Methyl-1-[(2-nitrophenyl)selenenyl]propyl]oxolane (**40**) and (2*R*,3*S*)-3-(2-Nitrophenyl)selenenyl-2-(1-methylethyl)oxane (**41**) (Table 5, entry 4)**

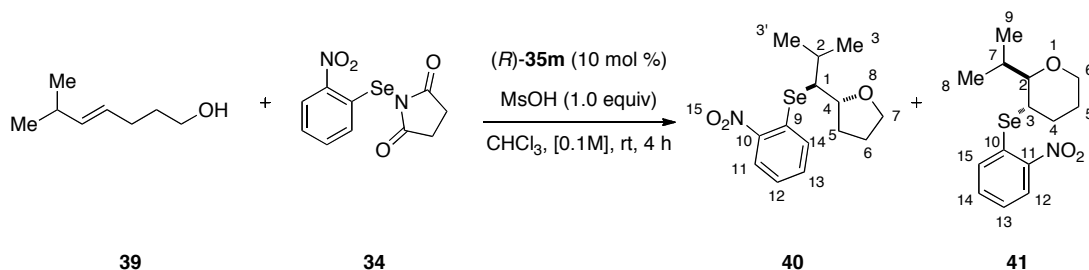

Following General Procedure 9, **34** (329 mg, 1.10 mmol, 1.1 equiv), (*R*)-**35m** (45.9 mg, 0.100 mmol, 0.1 equiv), (*E*)-**39** (128 mg, 1.00 mmol), MsOH (65.0  $\mu$ L, 1.10 mmol, 1.0 equiv), and CHCl<sub>3</sub> (10 mL) were combined to yield after column chromatography (silica gel, 25 mm x 31 cm column, hexanes/EtOAc, 91/9) three sets of fractions. These fractions contained pure **41** (26.4 mg, yellow oil), mixture of **40** and **41** (110 mg, yellow oil), and pure **40** (147 mg, yellow oil). The combined yield of the **40** and **41** was 86% (283 mg). Note: The racemates of **40** and **41** were prepared following General Procedure 6 with Ph<sub>3</sub>P(S) as the catalyst and TFA as the Brønsted acid.

**Data for 40:**

<sup>1</sup>H NMR: (500 MHz, CDCl<sub>3</sub>)

8.12 (dd, *J* = 8.5, 1.5 Hz, 1 H), 7.86 (d, *J* = 7.5 Hz, 1 H), 7.47 (td, *J* = 8.5, 1.5 Hz, 1 H), 7.29 (td, *J* = 8.0, 1.0 Hz, 1 H), 4.16 (dd, *J* = 14.5, 7.5 Hz, 1 H), 3.85 (dd, *J* = 15.0, 7.0 Hz, 1 H), 3.75 (dd, *J* = 7.5, 6.0 Hz, 1 H), 3.43 (dd, *J* = 7.5, 4.5 Hz, 1 H), 2.28-2.22 (m, 1 H), 2.12-2.05 (m, 1 H), 1.90-1.83 (m, 2 H), 1.65-1.57 (m, 1H), 1.09 (d, *J* = 6.5 Hz, 3 H), 1.06 (d, *J* = 7.0 Hz, 3 H).

<sup>13</sup>C NMR: (125 MHz, CDCl<sub>3</sub>)

148.8, 133.0, 132.2, 131.8, 125.8, 125.7, 80.3, 68.2, 58.6, 30.9, 30.3, 25.9, 21.5, 19.6.

IR: (NaCl plates, CH<sub>2</sub>Cl<sub>2</sub>)

3085 (w), 3057 (w), 2959 (s), 2872 (s), 1589 (s), 1566 (m), 1512 (s), 1450 (m), 1383 (w), 1331 (s), 1298 (s), 1252 (m), 1181 (w), 1149 (w), 1096 (m), 1055 (s), 1053 (s), 925 (w), 851 (m), 784 (m), 729 (s), 698 (m), 645 (m).

MS: (EI, 70 eV)

329.1 (4.2, M<sup>+</sup>), 127.1 (15.8), 71.1 (100.0), 57.2 (11.0).

HRMS: calcd for C<sub>14</sub>H<sub>19</sub>NO<sub>3</sub>Se: 329.0530, found: 329.0528

TLC: *R<sub>f</sub>* 0.26 (hexanes/EtOAc, 91/9) [UV]

Opt. Rot.: [ $\alpha$ ]<sub>D</sub><sup>24</sup> 11.70 (c = 1.80, CHCl<sub>3</sub>)

SFC: (2*S*,3*R*)-**40**, *t<sub>R</sub>* 10.47 min (17.4%); (2*R*,3*S*)-**40**, *t<sub>R</sub>* 11.35 min (82.6%), (Chiralpak OD, 125 bar, 10% MeOH in CO<sub>2</sub>, 1.0 mL/min, 220 nm, 40 °C)

Analysis: C<sub>14</sub>H<sub>19</sub>NO<sub>3</sub>Se (329.0530)

Calcd: C, 51.22; H, 5.83; N, 4.27%

Found: C, 51.24; H, 5.77; N, 4.28%

Data for **41**:

<sup>1</sup>H NMR: (500 MHz, CDCl<sub>3</sub>)

8.18 (dd, *J* = 8.0, 1.0 Hz, 1 H, HC(12)), 7.64 (d, *J* = 7.5 Hz, 1 H, HC(15)), 7.52 (td, *J* = 8.0, 1.0 Hz, 1 H, , HC(14)), 7.34 (td, *J* = 8.0, 1.0 Hz, 1 H, HC(13)), 4.04-4.02 (m, 1 H, HC(6)), 3.49-3.41 (m, 2 H), 3.31 (dd, *J* = 10.0, 2.5 Hz, 1 H), 2.32-2.28 (m,

1 H), 2.17 (septd,  $J = 6.5, 2.0$  Hz, 1 H, HC(2)), 1.84-1.62 (m, 3H), 1.00 (d,  $J = 6.5$  Hz, 3H), 0.87 (d,  $J = 6.5$  Hz, 3H).

$^{13}\text{C}$  NMR: (125 MHz,  $\text{CDCl}_3$ )

148.6, 133.2, 130.9, 130.5, 126.2, 126.1, 84.5 (C(2)), 68.3 (C(6)), 41.9 (C(3)), 32.2, 29.9, 27.8, 20.4, 14.7.

IR: (NaCl plates,  $\text{CH}_2\text{Cl}_2$ )

3071 (w), 2960 (s), 2872 (m), 2851 (m), 1590 (m), 1567 (m), 1515 (s), 1464 (m), 1450 (m), 1379 (w), 1331 (s), 1302 (m), 1262 (m), 1252 (m), 1102 (s), 1081 (m), 1067 (m), 1026 (m), 999 (m), 922 (m), 872 (w), 852 (m), 805 (w), 783 (m), 730 (s), 702 (m), 645 (w).

MS: (EI, 70 eV)

329.1 (5.5,  $\text{M}^+$ ), 201.9 (22.9), 199.9 (11.1), 127.1 (32.2), 106.0 (14.2), 71.1 (100.0), 55.1 (18.6).

HRMS: calcd for  $\text{C}_{14}\text{H}_{19}\text{NO}_3\text{Se}$ : 329.0530, found: 329.0525

TLC:  $R_f$  0.32 (hexanes/EtOAc, 91/9) [UV]

Opt. Rot.:  $[\alpha]_{\text{D}}^{24}$  14.3 ( $c = 0.80$ ,  $\text{CHCl}_3$ )

SFC: (2*R*,3*S*)-**41**,  $t_R$  3.27 min (83.8%); (2*S*,3*R*)-**41**,  $t_R$  3.85 min (16.2%), (Chiralpak OD, 125 bar, 10% MeOH in  $\text{CO}_2$ , 3.0 mL/min, 220 nm, 40 °C)

**Preparation of *rel* (2*R*,3*R*)-3-(2-Nitrophenyl)selenenyl-2-phenyloxolane (**42**) (Table 5, entry 5)**

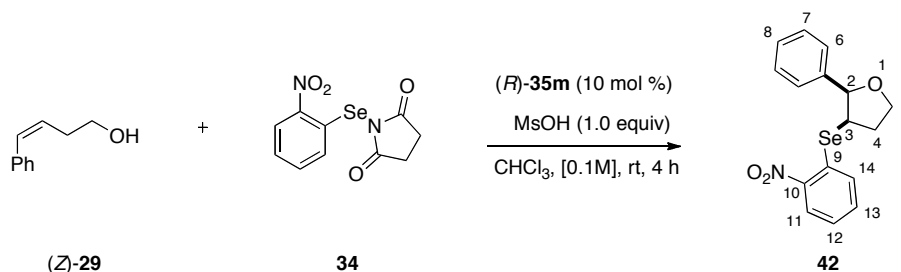

Following General Procedure 8, **34** (329 mg, 1.10 mmol, 1.1 equiv), (*R*)-**35m** (45.9 mg, 0.100 mmol, 0.1 equiv), (*Z*)-**29** (148 mg, 1.00 mmol), MsOH (65.0  $\mu$ L, 1.10 mmol, 1.0 equiv), and CHCl<sub>3</sub> (10 mL) were combined to yield after column chromatography (silica gel, 25 mm x 31 cm column, 91/9 then 88/12 hexanes/EtOAc) 278 mg (80%) of seleno ether **42** as a yellow solid. The product was further purified by recrystallization (EtOAc/hexanes) to obtain analytically pure material. Note: The racemate of **42** was prepared following General Procedure 6 with Ph<sub>3</sub>P(S) as the catalyst and TFA as the Brønsted acid.

Data for **42**:

mp: 109-110 °C

<sup>1</sup>H NMR: (500 MHz, CDCl<sub>3</sub>)

8.13 (d, *J* = 8.0 Hz, 1 H, HC(11)), 7.55 (d, *J* = 7.5 Hz, 1 H), 7.45 (t, *J* = 8.0 Hz, 1 H), 7.34-7.23 (m, 6 H), 5.30 (d, *J* = 6.0 Hz, 1 H, HC(2)), 4.35 (dd, *J* = 14.0, 7.5 Hz, 1 H, HC(5)), 4.25 (dd, *J* = 11.0, 5.5 Hz, 1 H, HC(3)), 4.05 (dd, *J* = 14.0, 8.0 Hz, 1 H, HC(5)), 2.79-2.72 (m, 1 H, HC(4)), 2.30-2.23 (m, 1 H, HC(4)).

<sup>13</sup>C NMR: (125 MHz, CDCl<sub>3</sub>)

147.5, 138.6, 133.2, 132.5, 130.3, 128.0, 127.9, 126.3, 126.1, 125.5, 82.7 (C(2)), 67.3 (C(5)), 44.7 (C(3)), 33.8 (C(4)).

IR: (KBr pellets)

3078 (s), 3035 (s), 2979 (m), 2950 (s), 2922 (m), 2876 (s), 1975 (w), 1948 (m), 1819 (w), 1741 (w), 1589 (s), 1563 (s), 1513 (s), 1496 (s), 1457 (s), 1369 (s), 1332 (s), 1305 (s), 1252 (s), 1223 (s), 1213 (s), 1174 (s), 1149 (s), 1099 (s), 1092 (s), 940 (s), 1055 (s), 1021 (s), 961 (s), 940 (s), 903 (s), 852 (s), 808 (m), 786 (s), 752 (s), 733 (s), 700 (s), 681 (s), 644 (s), 620 (s), 546 (m).

MS: (EI, 70 eV)

349.1 (17.8, M<sup>+</sup>), 243.0 (12.5), 202.0 (13.1), 188.0 (10.3), 186.0 (61.5), 184.0 (29.7), 183.0 (10.3), 182.0 (12.4), 163.1 (21.0), 156.0 (11.0), 147.1 (73.0), 146.1 (100.0), 117.1 (12.2), 115.1 (19.2), 106.0 (32.8), 105.1 (73.6), 91.1 (40.1), 78.1 (12.1), 77.1 (40.2).

HRMS: calcd for C<sub>16</sub>H<sub>15</sub>NO<sub>3</sub>Se: 349.0217, found: 349.0201

TLC: R<sub>f</sub> 0.06 (hexanes/EtOAc, 88/12) [UV]

SFC: (2*R*,3*R*)-**42**, t<sub>R</sub> 12.57 min (50.9%); (2*S*,3*S*)-**42**, t<sub>R</sub> 13.48 min (49.1%), (Chiralpak AD, 125 bar, 12% MeOH in CO<sub>2</sub>, 2.5 mL/min, 220 nm, 40 °C)

Analysis: C<sub>16</sub>H<sub>15</sub>NO<sub>3</sub>Se (349.0217)

Calcd: C, 55.18; H, 4.34; N, 4.02%

Found: C, 55.10; H, 4.34; N, 3.99%

**General Procedure 9. Isomerization Procedure for Seleno Ethers **37**, **38**, **40** and **41****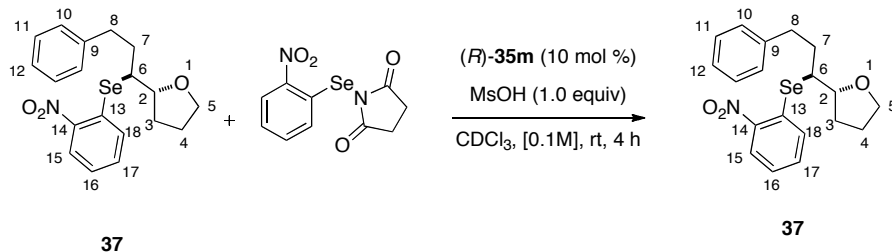

To an oven-dried NMR tube containing **34** (14.9 mg, 0.049 mmol, 1.0 equiv) was added a solution of seleno ether **37** (19.5 mg, 0.049 mmol), and (*R*)-**35m** (2.3 mg, 0.005 mmol, 0.10 equiv) in  $\text{CDCl}_3$  (0.50 mL) under an ambient atmosphere. MsOH (3.2  $\mu\text{L}$ , 0.049 mmol, 1.0 equiv) was added and the tube was secured with a septum. The resulting solution was shaken and monitored periodically by  $^1\text{H}$  NMR spectroscopy which showed no isomerization of **37** to **38** over 4 h.

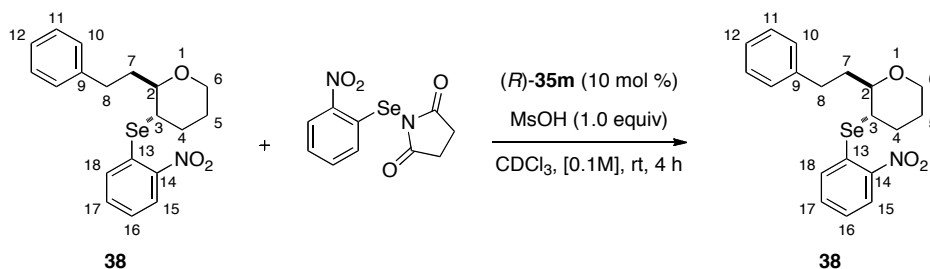

Following General Procedure 9, **34** (2.4 mg, 0.008 mmol, 1.0 equiv), seleno ether **38** (3.1 mg, 0.008 mmol), (*R*)-**35m** (0.4 mg, 0.001 mmol, 0.10 equiv) and MsOH (0.51  $\mu\text{L}$ , 0.008 mmol, 1 equiv) were combined in  $\text{CDCl}_3$  (0.1 mL) under an ambient atmosphere.  $^1\text{H}$  NMR spectroscopic analysis of the reaction mixture showed no isomerization of **38** to **37** over 4 h.

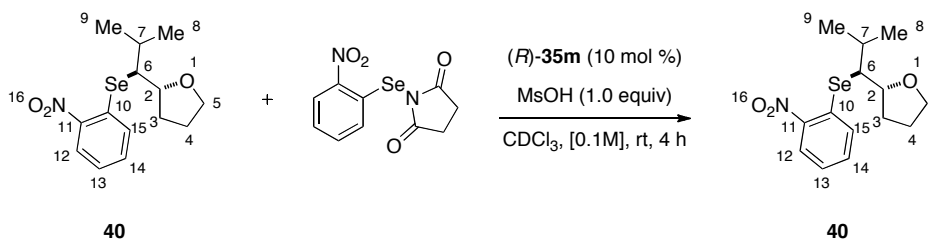



Following General Procedure 9, **34** (17.7 mg, 0.059 mmol, 1.0 equiv), seleno ether **40** (19.5 mg, 0.059 mmol), (*R*)-**35m** (2.7 mg, 0.006 mmol, 0.10 equiv) and MsOH (3.8  $\mu$ L, 0.059 mmol, 1.0 equiv) were combined in  $\text{CDCl}_3$  (0.59 mL) under an ambient atmosphere.  $^1\text{H}$  NMR spectroscopic analysis of the reaction mixture showed no isomerization of **40** to **41** over 4 h.

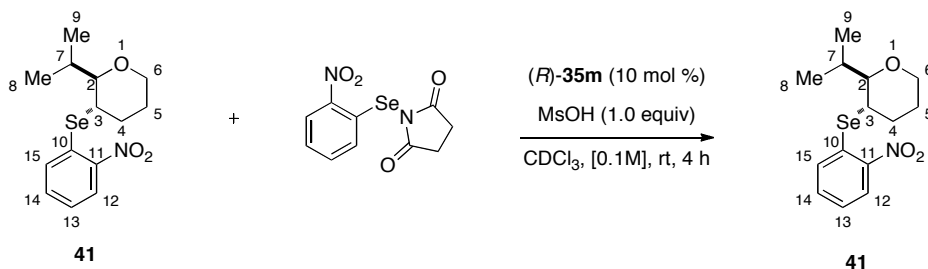

Following General Procedure 9, **34** (6.8 mg, 0.023 mmol, 1.0 equiv), seleno ether **41** (7.5 mg, 0.023 mmol), (*R*)-**35m** (1.0 mg, 0.002 mmol, 0.10 equiv) and MsOH (1.5  $\mu$ L, 0.023 mmol, 1.0 equiv) were combined in  $\text{CDCl}_3$  (0.23 mL) under an ambient atmosphere.  $^1\text{H}$  NMR spectroscopic analysis of the reaction mixture showed no isomerization of **41** to **40** over 4 h.

**Mechanistic Studies. Formation of Complexes 43-45.****Formation of complex 43. Scheme 14**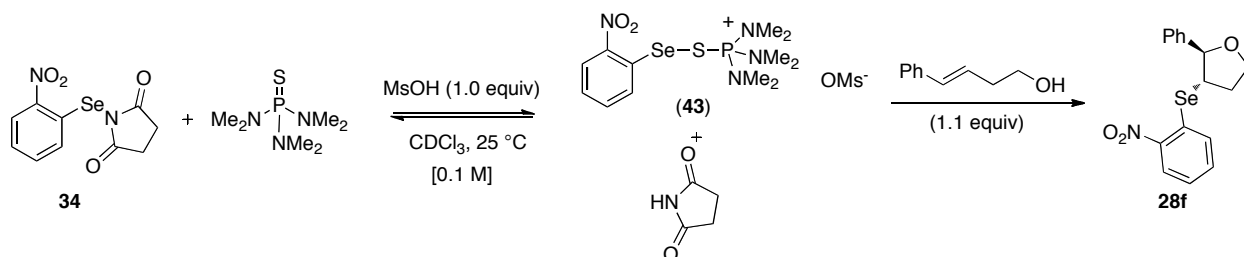

To an oven-dried, NMR tube containing **34** (25.0 mg, 0.083 mmol) was added a solution of HMPA(S) (16.3 mg, 0.083 mmol, 1.00 equiv) in  $\text{CDCl}_3$  (0.83 mL). Methanesulfonic acid (5.4  $\mu\text{L}$ , 0.083 mmol, 1.00 equiv) was added and the tube was secured with a septum. The mixture was shaken and then the solution was analyzed by  $^1\text{H}$  NMR spectroscopic analysis that showed instantaneous appearance of new peaks corresponding to **43**. The ratio of **43** to **34** equilibrated to 2:1 favoring **43** within 3 h. At room temperature  $^{31}\text{P}$  NMR spectra displayed a broad resonance at around 60 ppm, which decoalesced into two sharp peaks corresponding to **43** and HMPA(S) at -50  $^\circ\text{C}$ . The  $^{77}\text{Se}$  NMR also showed two sharp peaks corresponding to **43** and **34** at room temperature. This mixture was stable in solution for 48 h after which olefin (*E*)-**29** (13.6 mg, 0.092 mmol, 1.10 equiv) was added.  $^1\text{H}$  NMR spectroscopic analysis revealed complete conversion of the electrophile to the seleno ether after 1 h.

**Data for 43:**

$^{31}\text{P}$  NMR: (162 MHz,  $\text{CDCl}_3$ )

62.4

$^{77}\text{Se}$  NMR: (114 MHz,  $\text{CDCl}_3$ )

582

Formation of Complex **44**. Scheme 15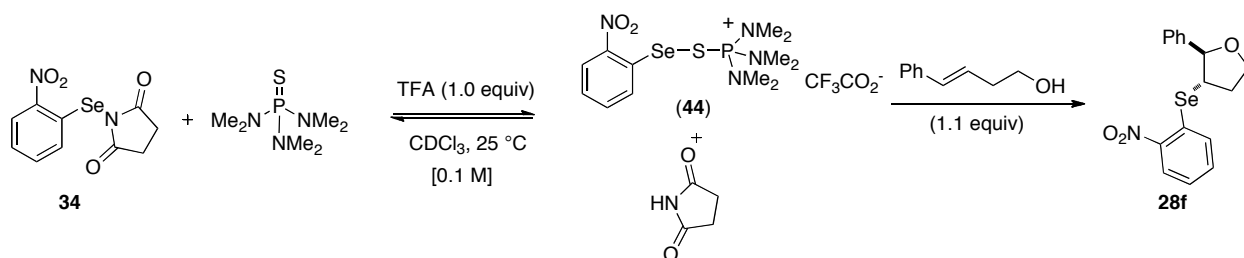

To an oven-dried, NMR tube containing **34** (25.0 mg, 0.083 mmol) was added a solution of HMPA(S) (16.35 mg, 0.083 mmol, 1.00 equiv) in  $\text{CDCl}_3$  (0.83 mL). Trifluoroacetic acid (6.4  $\mu\text{L}$ , 0.083 mmol, 1.0 equiv) was added and the tube was secured with a septum. The mixture was shaken and then the solution was analyzed by  $^1\text{H}$  NMR spectroscopic analysis that showed instantaneous appearance of new peaks corresponding to **44**. The ratio of **44** to **34** equilibrated to 0.9:1 within 3 h. At room temperature  $^{31}\text{P}$  NMR spectra displayed a broad resonance at around 60 ppm, which decoalesced into two sharp peaks corresponding to HMPA(S) and **44** at  $-50\text{ }^\circ\text{C}$ . The  $^{77}\text{Se}$  NMR also showed two sharp peaks corresponding to **34** and **44** at room temperature. This mixture was stable in solution for 48 h after which olefin (*E*)-**29** (13.6 mg, 0.092 mmol, 1.10 equiv) was added.  $^1\text{H}$  NMR spectroscopic analysis revealed 77% conversion of the electrophile to the seleno ether after 1 h.

Data for **44**: $^{31}\text{P}$  NMR: (162 MHz,  $\text{CDCl}_3$ )

63.4

 $^{77}\text{Se}$  NMR: (114 MHz,  $\text{CDCl}_3$ )

587

Formation of Complex **45**. Scheme 16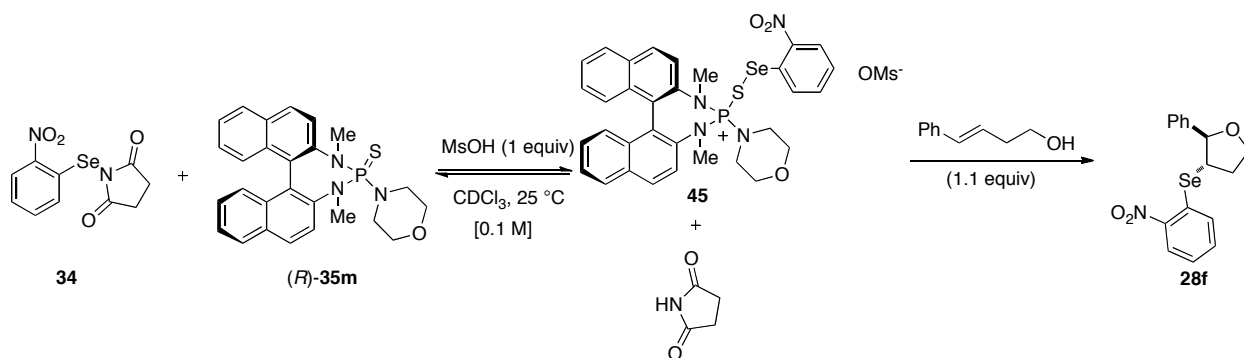

To an oven-dried, NMR tube containing **34** (16.3 mg, 0.054 mmol) was added a solution of *(R)*-**35m** (25.0 mg, 0.054 mmol, 1.00 equiv) in  $\text{CDCl}_3$  (0.54 mL). Methanesulfonic acid (3.5  $\mu\text{L}$ , 0.054 mmol, 1.00 equiv) was added and the tube was secured with a septum. The mixture was shaken and then the solution was analyzed by  $^1\text{H}$  NMR spectroscopic analysis that showed instantaneous appearance of new peaks corresponding to **45**. The ratio of *(R)*-**35m** to **45** equilibrated to 0.28:1 within 3 h. At room temperature  $^{31}\text{P}$  NMR spectra displayed a broad resonance at around 60 ppm, which decoalesced into two sharp peaks corresponding to *(R)*-**35m** and **45** at  $-50\text{ }^\circ\text{C}$ . The  $^{77}\text{Se}$  NMR also showed two sharp peaks corresponding to **34** and *(R)*-**35m** at room temperature. This mixture was stable in solution for 24 h after which olefin *(E)*-**29** (8.86 mg, 0.060 mmol, 1.1 equiv) was added.  $^1\text{H}$  NMR spectroscopic analysis revealed 100% conversion of the electrophile to the seleno ether after 1 h.

Data for **45**:

$^{31}\text{P}$  NMR: (500 MHz,  $\text{CDCl}_3$ )

65.1

$^{77}\text{Se}$  NMR: (500 MHz,  $\text{CDCl}_3$ )

620

**References**

- (1) Oh, K.; Knabe, W. E. *Tetrahedron* **2009**, *65*, 2966-2974.
- (2) Baumgartner, H.; OSullivan, A. C.; Schneider, J. *Heterocycles* **1997**, *45*, 1537-1549.
- (3) Grünanger, C. U.; Breit, B. *Angew. Chem. Int. Ed.* **2010**, *49*, 967-970.
- (4) Hori, T.; Sharpless, K. B. *J. Org. Chem.* **1979**, *44*, 4208-4210.
- (5) Haynes, R. K.; Indorato, C. *Aust. J. Chem.* **1984**, *37*, 1183-1194.
- (6) Janssen, R. A. J.; Kingma, J. A. J. M.; Buck, H. M. *J. Am Chem. Soc.* **1988**, *110*, 3018-3026.
- (7) Denk, M. K.; Gupta, S.; Brownie, J.; Tajammul, S.; Lough, A. J. *Chem. Eur. J.* **2001**, *7*, 4477-4486.
- (8) Zhong, P.; Guo, M. P. *Synth. Commun.* **2001**, *31*, 1507-1510.
- (9) Brink, G. -J.; Fernandes, B. C. M.; van Vliet, M. C. A.; Arends, I. W. C. E.; Sheldon, R. *A. J. Chem. Soc., Perkin Trans. I* **2001**, *3*, 224-228.
- (10) Casar, Z.; Leban, I.; Majcen, M. A.; Lorcy, D. *J. Chem. Soc., Perkin Trans.* **2002**, *13*, 1568-1573.
- (11) Perez-Balado, C.; Marko, I. E. *Tetrahedron* **2006**, *62*, 2331-2349.
- (12) Wang, Z.; Shi, Y. *J. Org. Chem.* **1998**, *63*, 3099-3104.
- (13) a) Sharpless, K. B.; Amberg, W.; Bennani, Y. L.; Crispino, G. A.; Hartung, J.; Jeong, K.; Kwong, H.; Morikawa, K.; Wang, Z.; Xu, D.; Zhang, X. *J. Org. Chem.* **1992**, *57*, 2768-2771. (b) Xu, D.; Park, C. Y.; Sharpless, K. B. *Tetrahedron Lett.* **1994**, *16*, 2495-2498.
- (14) Miyano, S.; Nawa, M.; Mori A.; Hashimoto, H. *Bull. Chem. Soc. Jpn.* **1984**, *57*, 2171-2176.

diCF3diselenide

expl stdlh

| SAMPLE              |                | DEC. & VT  |          |
|---------------------|----------------|------------|----------|
| date                | May 21 2009    | dn         | H1       |
| solvent             | CDC13          | dof        | 0        |
| file                | /export/home/~ | dm         | nnn      |
| data/ui400/Denmark~ | dmm            | c          |          |
| /kalyanid/dk-2-83~  | dmf            | 200        |          |
| crop2.fid           | dpwr           | 20         |          |
| ACQUISITION         |                | PROCESSING |          |
| sfrq                | 399.746        | lb         | 0.30     |
| tn                  | H1             | wtfile     |          |
| at                  | 4.096          | proc       | ft       |
| np                  | 65536          | fn         | not used |
| sw                  | 8000.0         | math       | f        |
| fb                  | 4000           |            |          |
| bs                  | 16             | werr       |          |
| tpwr                | 63             | wexp       |          |
| pw                  | 5.8            | wbs        |          |
| dl                  | 0              | wnt        |          |
| tof                 | -425.7         | DISPLAY    |          |
| nt                  | 8              | sp         | -199.9   |
| ct                  | 8              | wp         | 4397.0   |
| alock               | n              | vs         | 162      |
| gain                | not used       | sc         | 0        |
| FLAGS               |                | wc         | 250      |
| il                  | n              | hzmm       | 17.59    |
| in                  | n              | is         | 3265.00  |
| dp                  | y              | rfl        | 2426.7   |
| hs                  | nn             | rfp        | 0        |
|                     |                | th         | 20       |
|                     |                | ins        | 4.000    |
|                     |                | nm         | ph       |

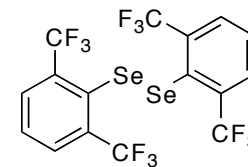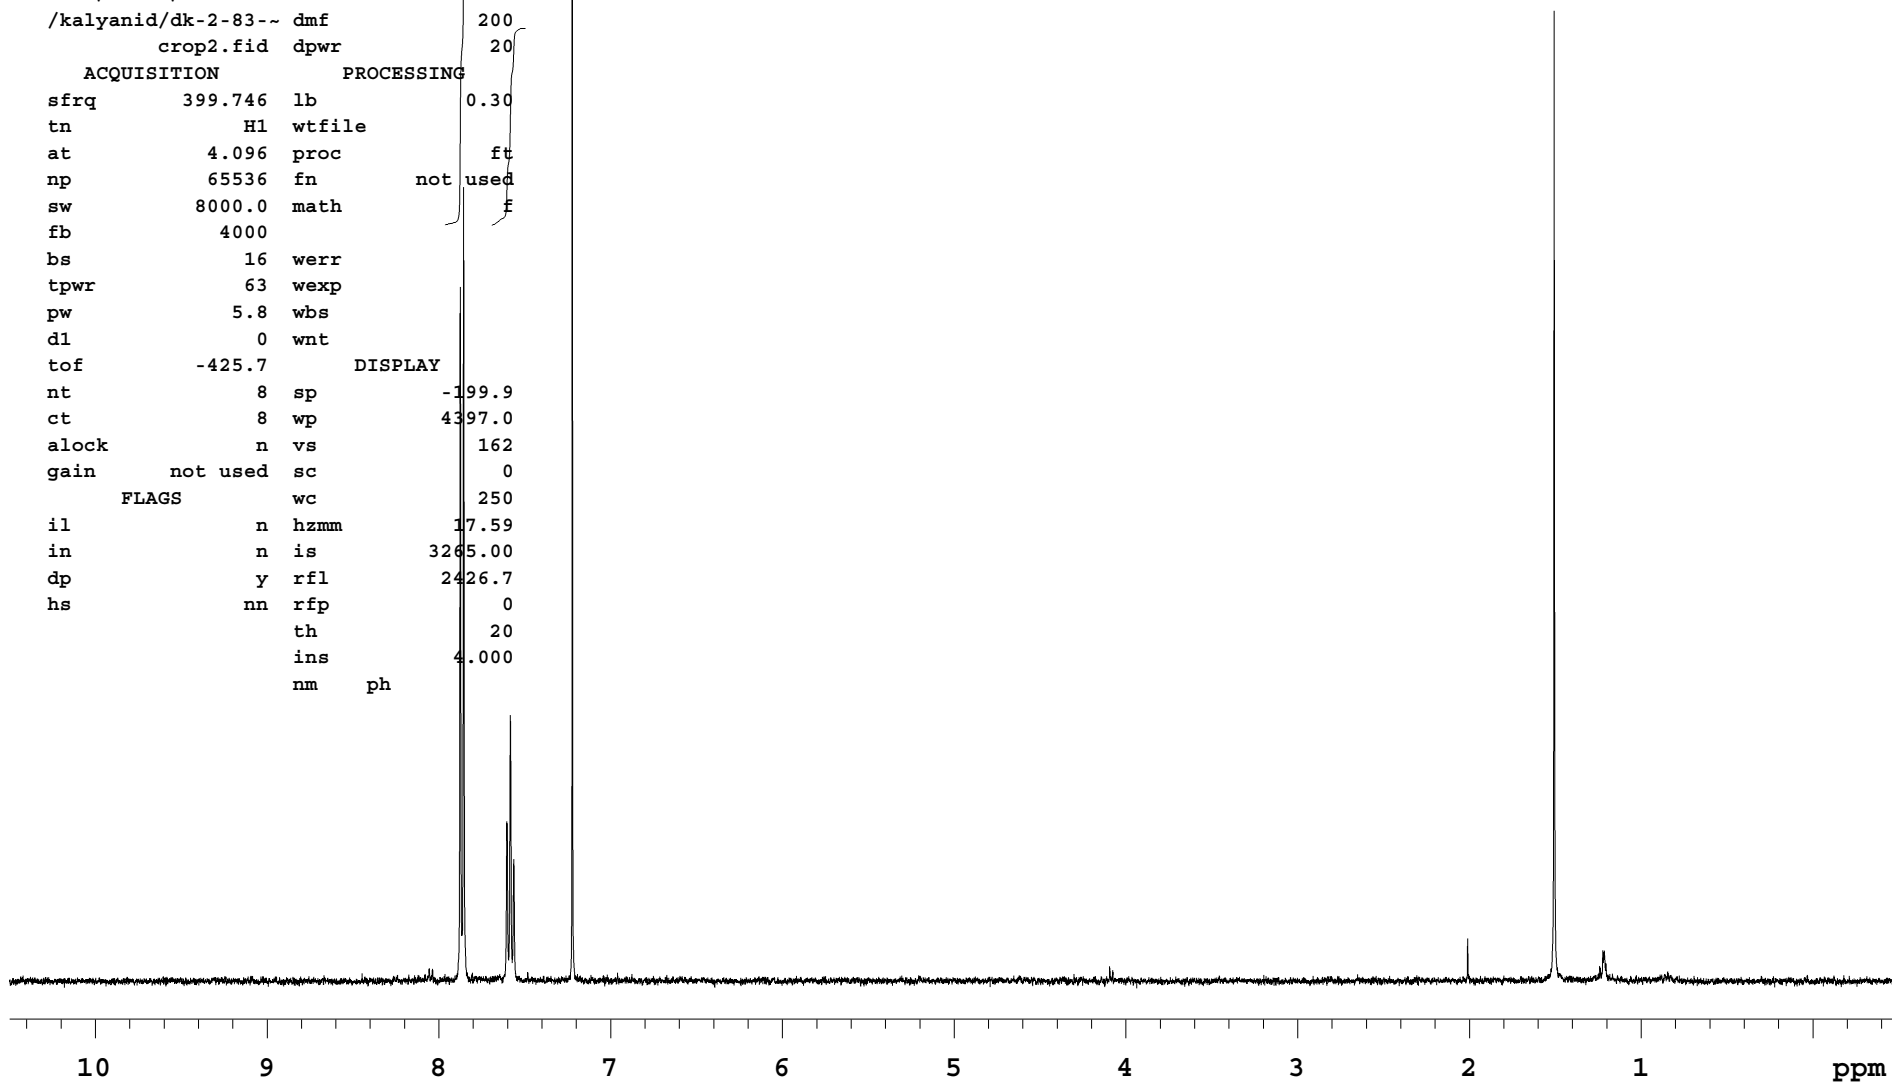

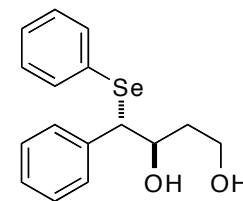

24a

exp1 s2pul

| SAMPLE              |                | DEC. & VT  |          |
|---------------------|----------------|------------|----------|
| date                | Jan 23 2010    | dfrq       | 499.693  |
| solvent             | CDC13          | dn         | H1       |
| file                | /export/home/~ | dpwr       | 20       |
| userid/data/u500/k~ |                | dof        | 0        |
| alyanid/dk-6-54c2~  |                | dm         | nnn      |
| 33-37.fid           |                | dmm        | c        |
| ACQUISITION         |                | dmf        |          |
| sfrq                | 499.693        | dseq       | 200      |
| tn                  | H1             | dres       | 1.0      |
| at                  | 4.665          | homo       | n        |
| np                  | 65536          | DEC2       |          |
| sw                  | 7024.9         | dfrq2      | 0        |
| fb                  | 4000           | dn2        |          |
| bs                  | 4              | dpwr2      | 1        |
| tpwr                | 63             | dof2       | 0        |
| pw                  | 6.5            | dm2        | n        |
| dl                  | 0              | dmm2       | c        |
| tof                 | 2.0            | dmf2       | 200      |
| nt                  | 1              | dseq2      |          |
| ct                  | 1              | dres2      | 1.0      |
| alock               | n              | homo2      | n        |
| gain                | not used       | PROCESSING |          |
| FLAGS               | lb             |            | 0.30     |
| il                  | n              | wtfile     |          |
| in                  | n              | proc       | ft       |
| dp                  | y              | fn         | not used |
| hs                  | nn             | math       | f        |
| DISPLAY             |                |            |          |
| sp                  | -250.0         | werr       |          |
| wp                  | 5496.6         | wexp       |          |
| vs                  | 194            | wbs        |          |
| sc                  | 0              | wnt        |          |
| wc                  | 250            |            |          |
| hzmm                | 21.99          |            |          |
| is                  | 265.47         |            |          |
| rfl                 | 1011.9         |            |          |
| rfp                 | 0              |            |          |
| th                  | 7              |            |          |
| ins                 | 1.000          |            |          |
| ai                  | ph             |            |          |

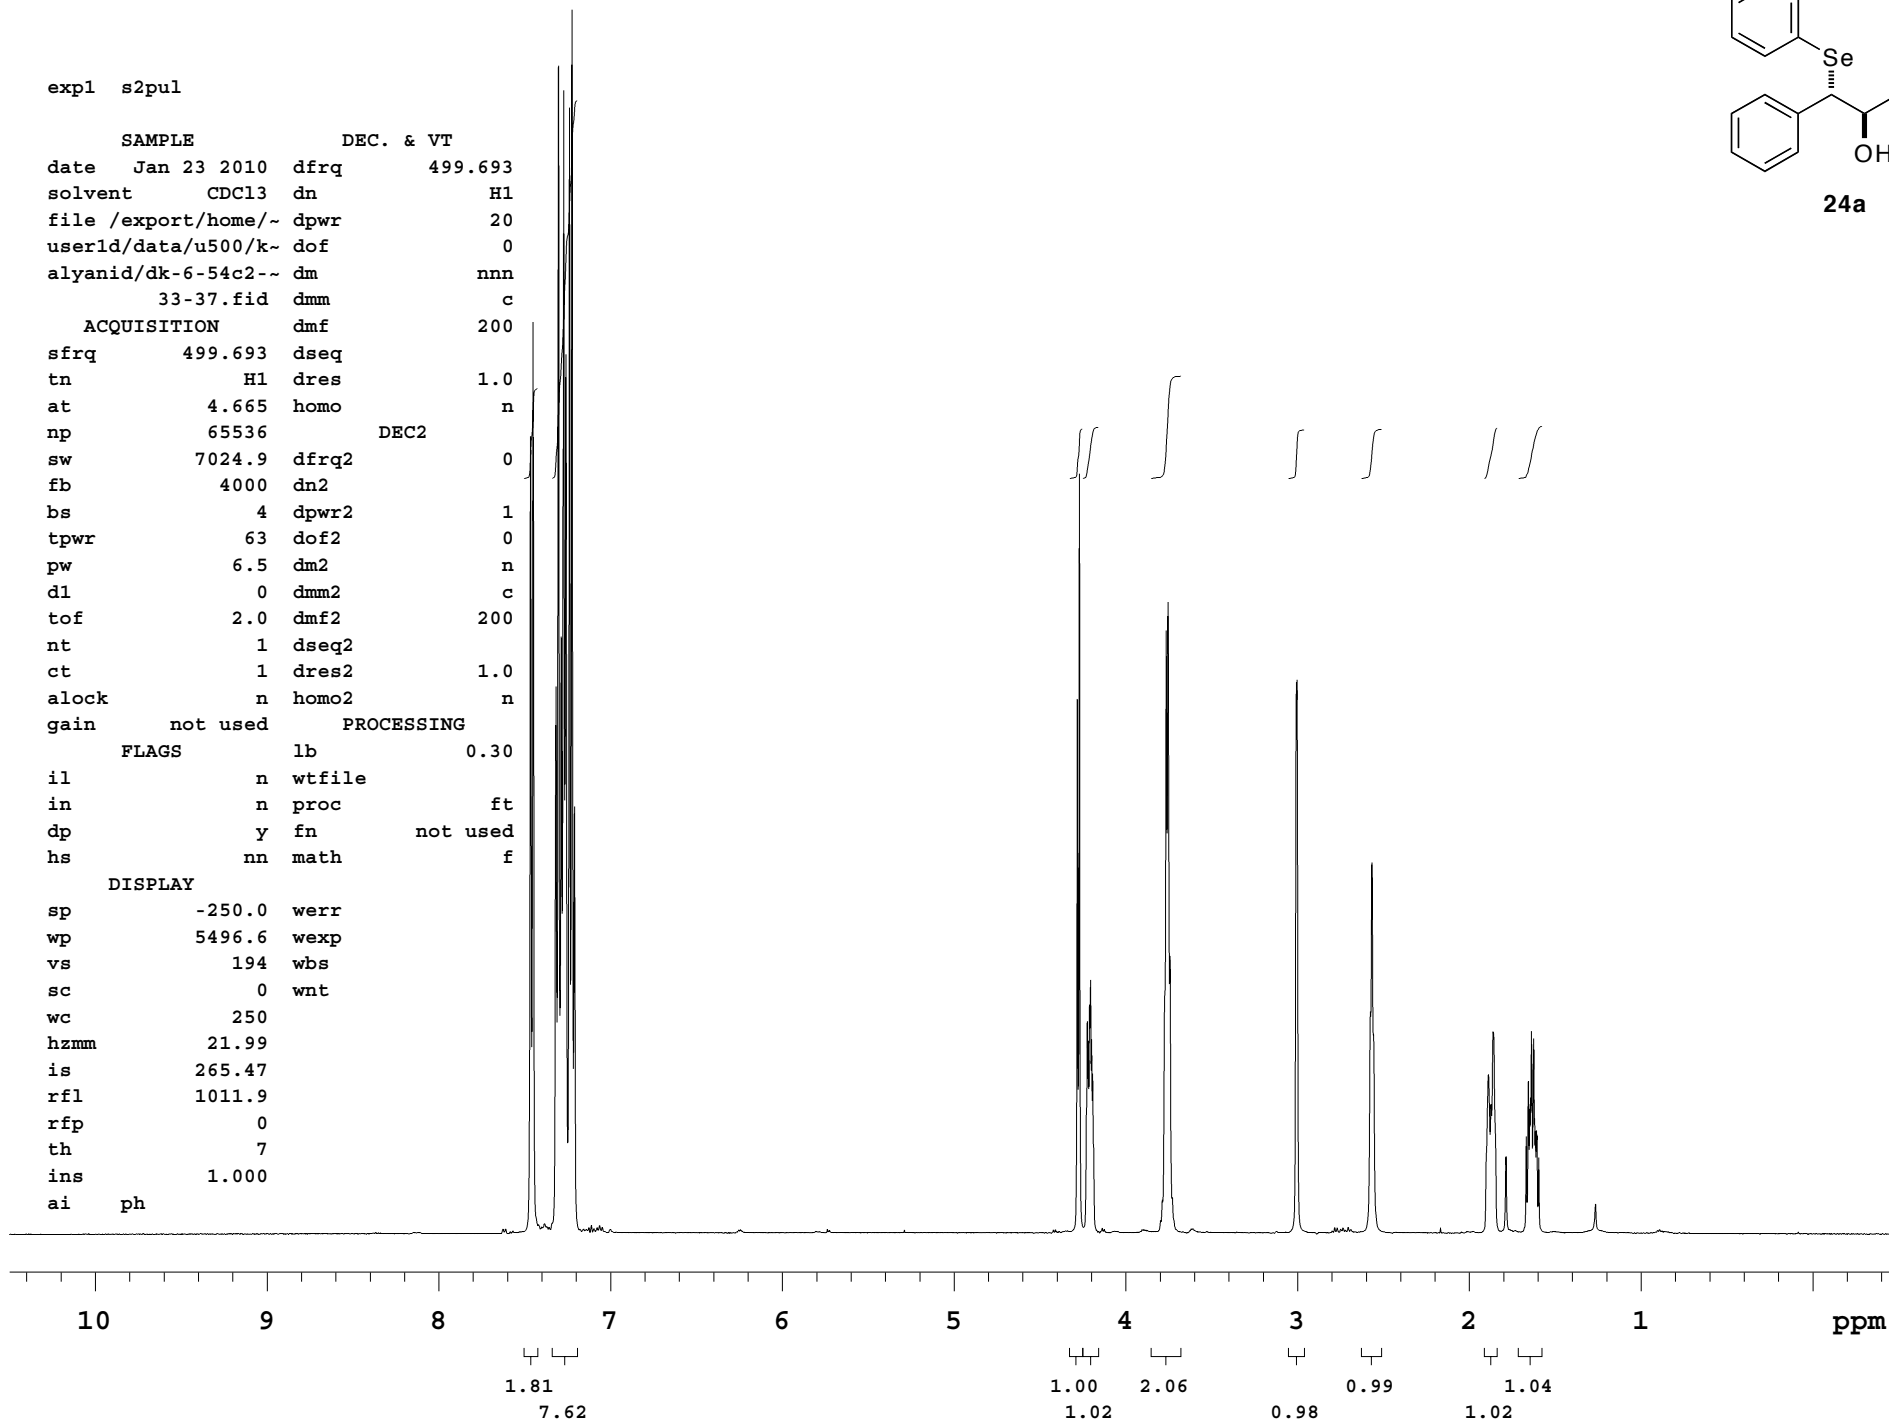

1H-24b

exp1 s2pul

SAMPLE DEC. & VT  
date Jan 30 2010 dfrq 499.693  
solvent CDCl3 dn H1  
file /export/home/~ dpwr 20  
userid/data/u500/k~ dof 0  
alyanid/dk-6-79c-4~ dm nnn  
6-50-concentrated.~ dmm c  
fid dmf 200

ACQUISITION dseq  
sfrq 499.693 dres 1.0  
tn H1 homo n  
at 4.665 DEC2  
np 65536 dfrq2 0  
sw 7024.9 dn2  
fb 4000 dpwr2 1  
bs 4 dof2 0  
tpwr 63 dm2 n  
pw 6.5 dmm2 c  
dl 0 dmf2 200  
tof 2.0 dseq2  
nt 1 dres2 1.0  
ct 1 homo2 n

PROCESSING  
alock n  
gain not used lb 0.30  
FLAGS wtf file  
il n proc ft  
in n fn not used  
dp y math f  
hs nn

DISPLAY werr  
sp -250.0 wexp  
wp 5496.6 wbs  
vs 68 wnt  
sc 0  
wc 250  
hzmm 21.99  
is 481.45  
rfl 1011.9  
rfp 0  
th 7  
ins 1.000  
ai ph

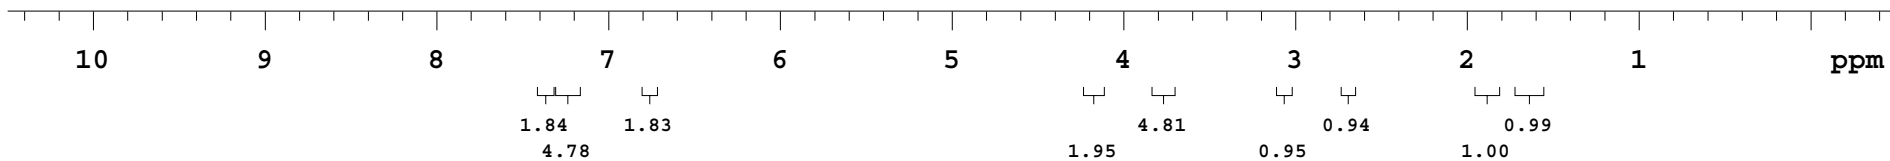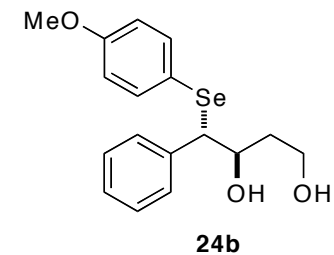



1H-24c

exp1 s2pul

```
SAMPLE          DEC. & VT
date   Jan 30 2010  dfrq      499.693
solvent CDC13      dn         H1
file   /export/home/~ dpwr     20
userid/data/u500/k~ dof       0
alyanid/dk-6-80c-2~ dm        nnn
9-36-concentrated.~ dmm       c
                      fid      dmf      200
ACQUISITION
sfrq   499.693      dres       1.0
tn     H1          homo        n
at     4.665      DEC2
np     65536      dfrq2       0
sw     7024.9     dn2
fb     4000      dpwr2       1
bs     4          dof2       0
tpwr   63        dm2         n
pw     6.5       dmm2        c
dl     0         dmf2       200
tof    2.0      dseq2
nt     16       dres2       1.0
ct     16       homo2       n
alock  n         PROCESSING
gain   not used  lb         0.30
FLAGS
il     n         proc         ft
in     n         fn         not used
dp     y         math        f
hs     nn
DISPLAY
sp     -1011.7   wexp
wp     7024.7   wbs
vs     91       wnt
sc     0
wc     250
hzmm   28.10
is     447.38
rfl    1011.9
rfp    0
th     7
ins    1.000
ai     ph
```

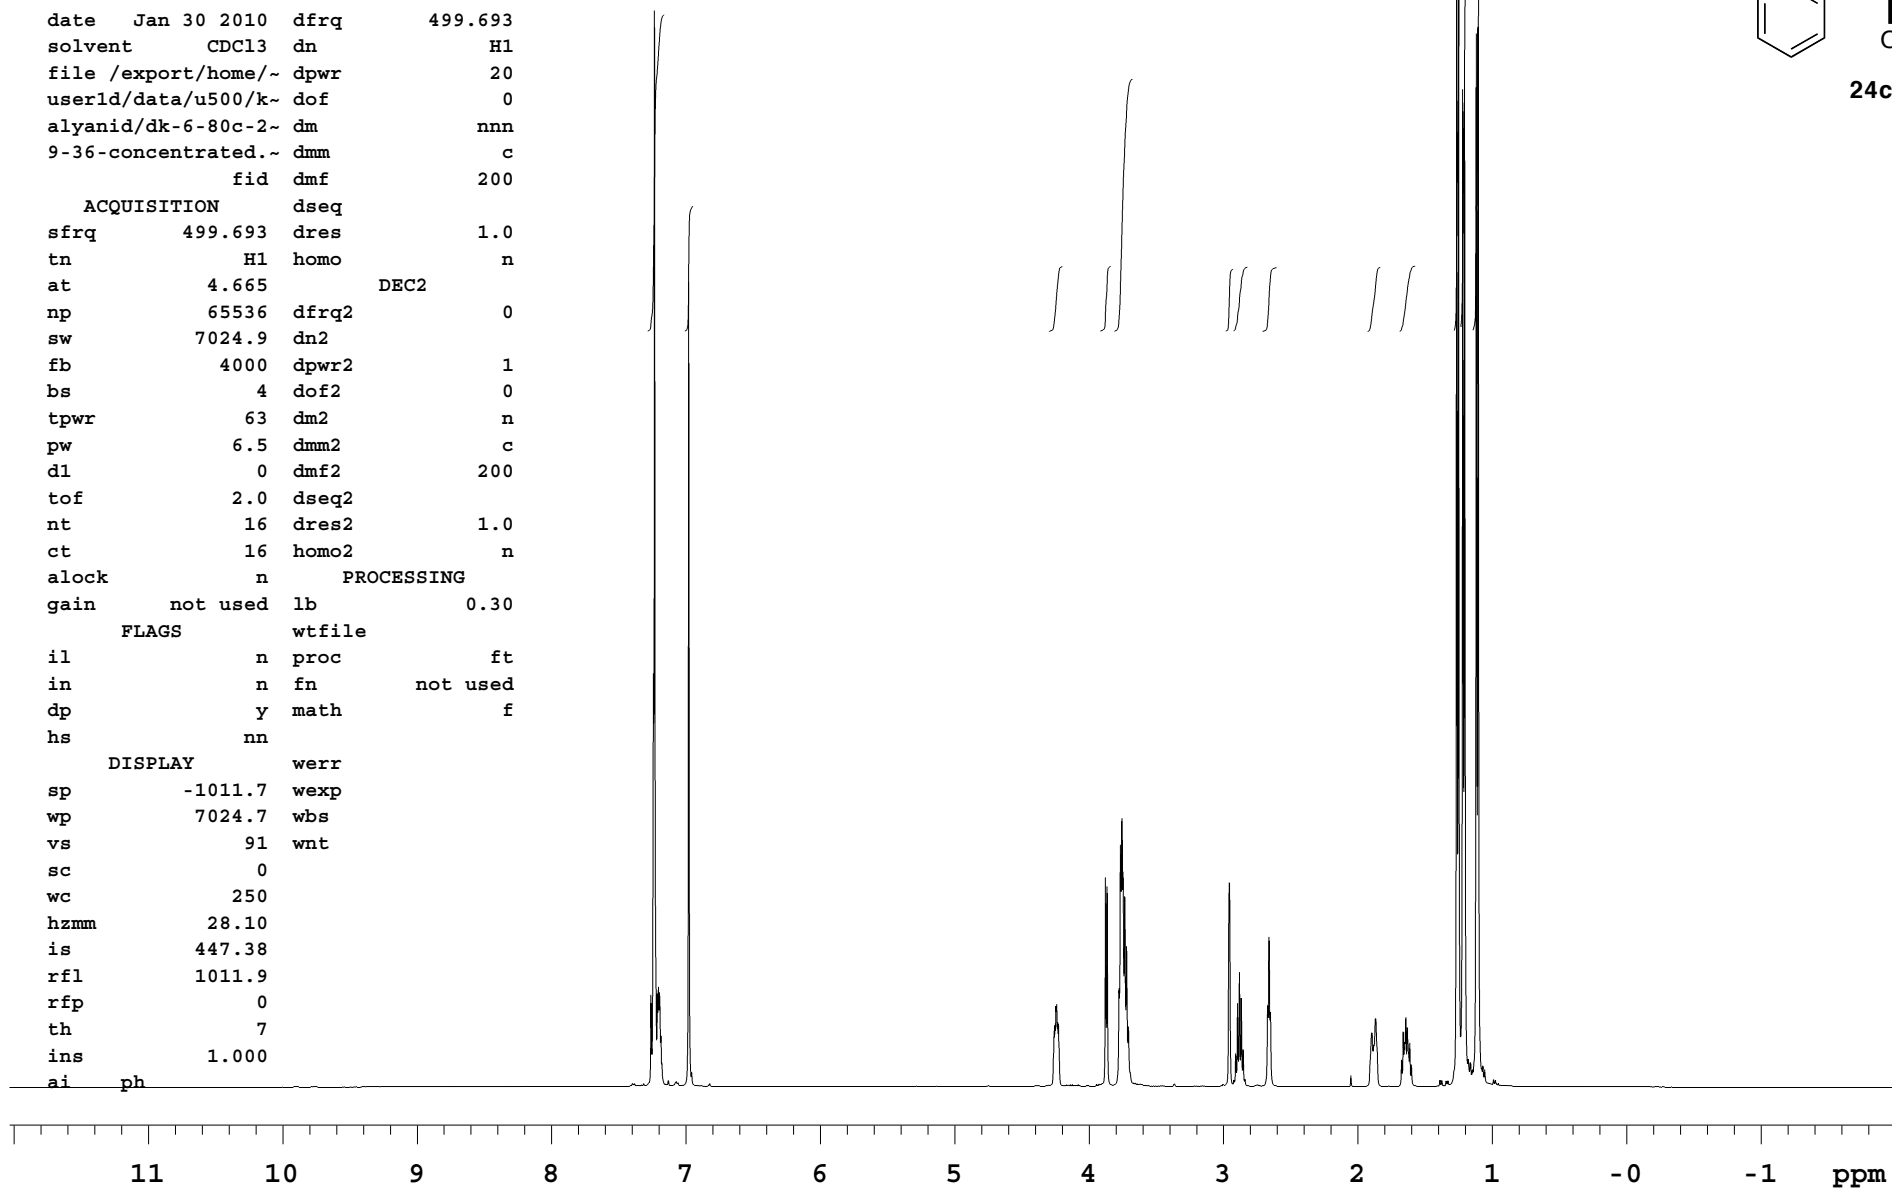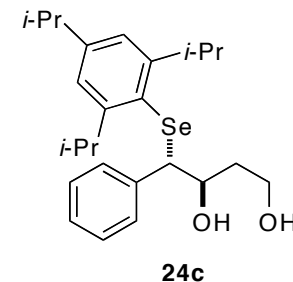

1H-24d

exp1 s2pul

```
SAMPLE          DEC. & VT
date Feb 5 2010 dfrq      500.070
solvent CDC13 dn         H1
file /export/home/~ dpwr      18
userid/data/ui500n~ dof       0
b/kalyanid/dk-6-75~ dm       nnn
c-58-67-proton.fid dmm       c
ACQUISITION     dmf       200
sfrq      500.070 dseq
tn         H1 dres      1.0
at         4.096 homo    n
np         65536          DEC2
sw         8000.0 dfrq2  0
fb         4000 dn2
bs         16 dpwr2     1
tpwr       55 dof2      0
pw         9.0 dm2      n
dl         0 dmm2       c
tof        0 dmf2      200
nt         1 dseq2
ct         1 dres2     1.0
alock      n homo2     n
gain       not used    PROCESSING
FLAGS      lb         0.30
il         n wtfile
in         n proc     ft
dp         y fn       not used
hs         nn math    f
DISPLAY
sp        -250.1 werr
wp        5500.7 wexp
vs         80 wbs
sc         0 wnt
wc         250
hzmm      22.00
is        369.79
rfl       1499.6
rfp        0
th         7
ins       1.000
ai        ph
```

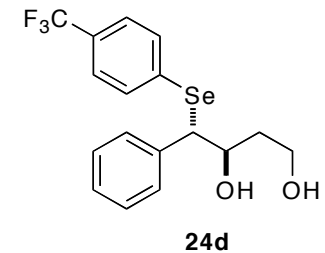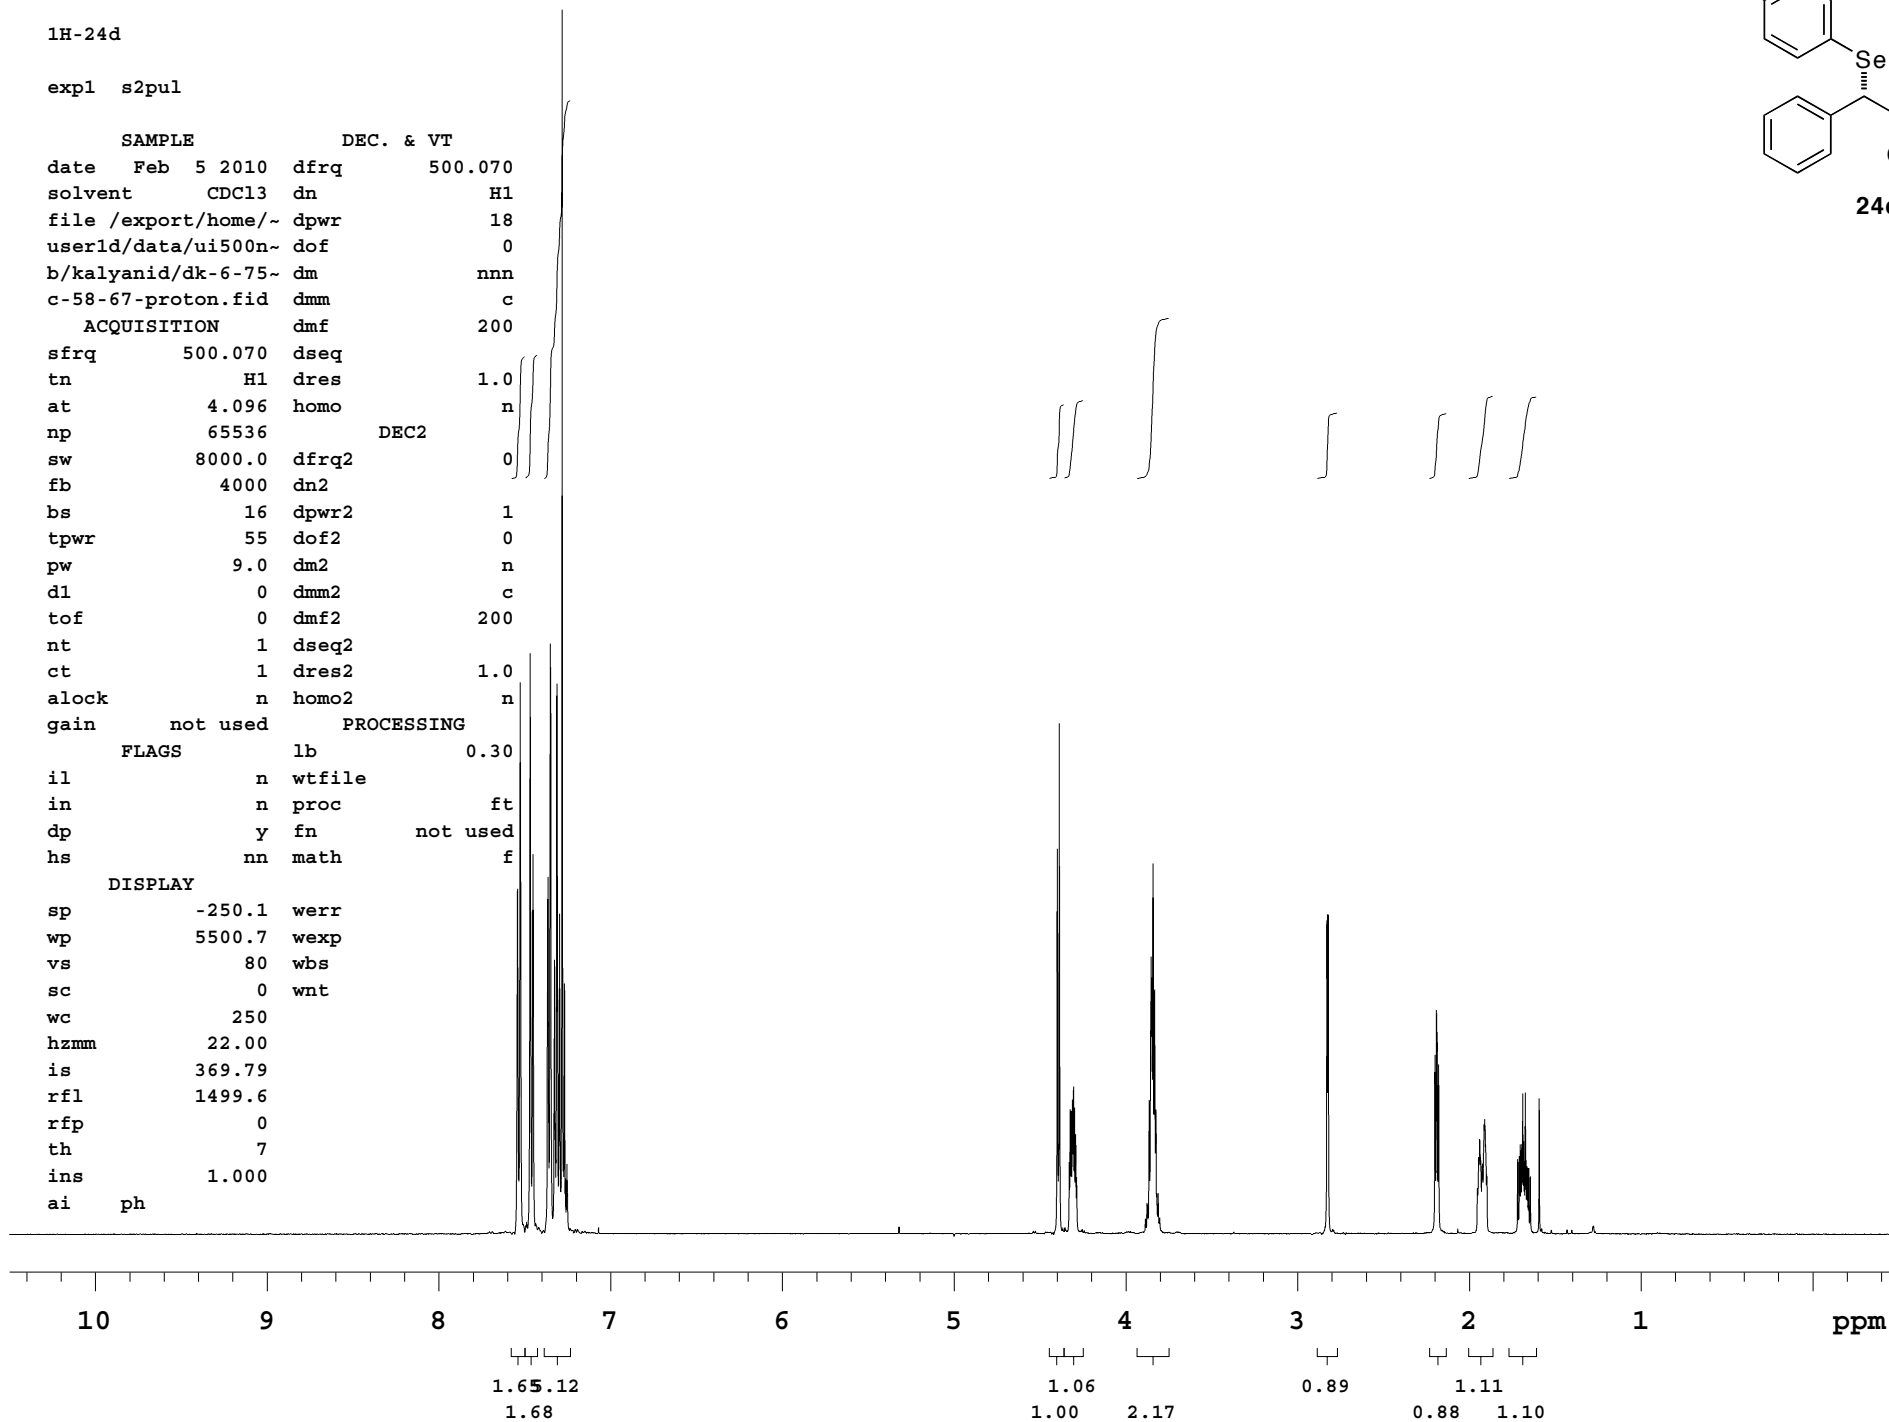

1H-24e

exp1 s2pul

```
SAMPLE      DEC. & VT
date Feb 11 2010 dfrq      500.070
solvent CDC13 dn          H1
file /export/home/~ dpwr      18
userid/data/ui500n~ dof       0
b/kalyanid/dk-6-78~ dm       nnn
.fid dmm          c
ACQUISITION dmf          200
sfrq      500.070 dseq
tn         H1 dres      1.0
at         4.096 homo    n
np         65536 DEC2
sw         8000.0 dfrq2  0
fb         4000 dn2
bs         16 dpwr2     1
tpwr      55 dof2      0
pw         9.0 dm2      n
dl         0 dmm2      c
tof        0 dmf2     200
nt         4 dseq2
ct         4 dres2     1.0
alock      n homo2    n
gain      not used PROCESSING
FLAGS      lb          0.30
il         n wtfile
in         n proc      ft
dp         y fn        not used
hs         nn math     f
DISPLAY
sp        -250.1 werr
wp        5500.7 wexp
vs         166 wbs
sc         0 wnt
wc         250
hzmm      22.00
is        299.49
rfl       1499.6
rfp        0
th         7
ins       1.000
ai      ph
```

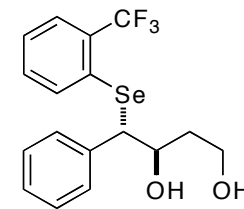

24e

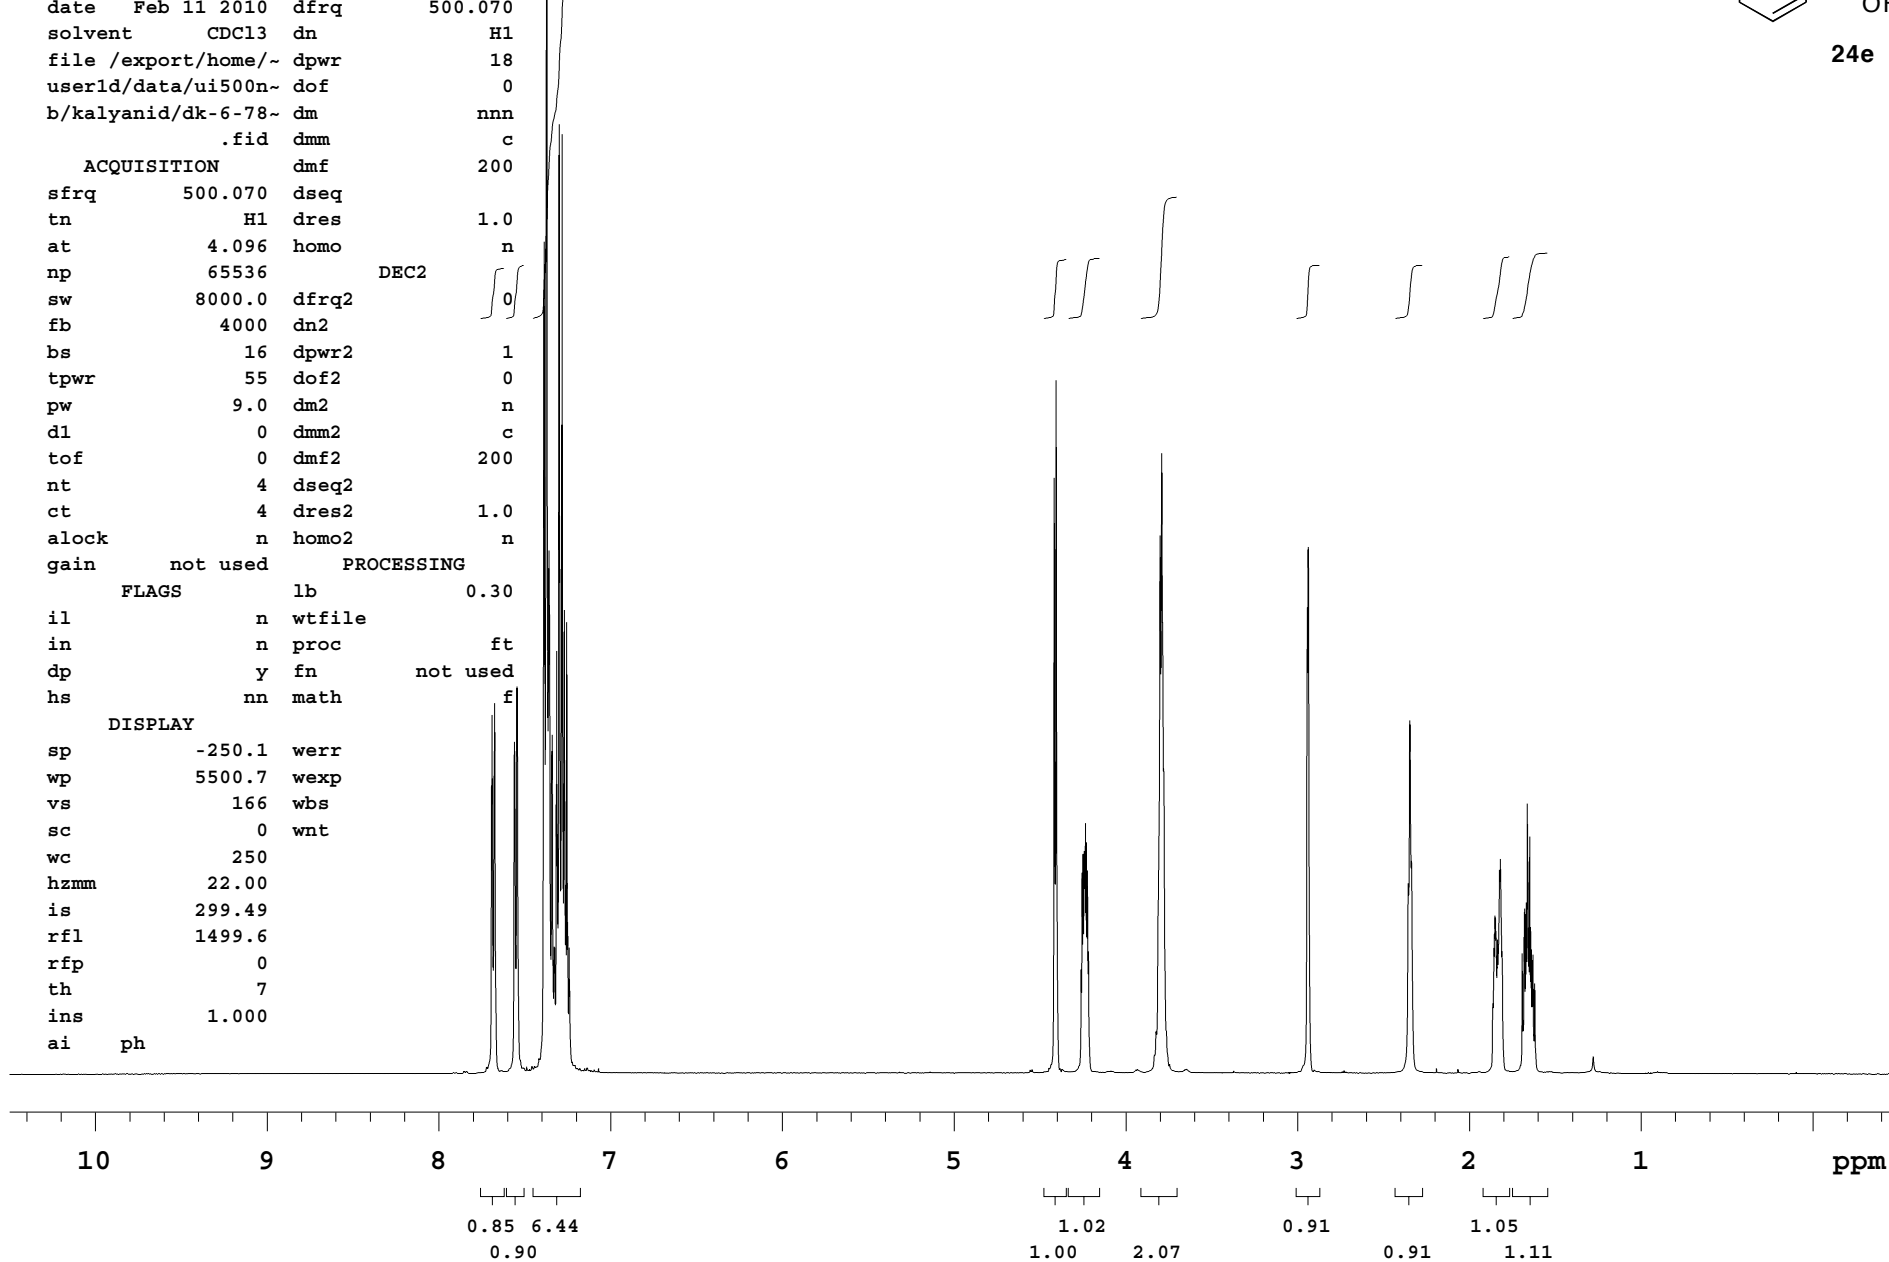

1H-24f

exp1 s2pul

```
SAMPLE          DEC. & VT
date Jun 10 2010 dfrq      499.693
solvent CDC13 dn          H1
file /export/home/~ dpwr    20
userid/data/u500/k~ dof     0
alyanid/dk-9-9c-pr~ dm     nnn
oton.fid dmm            c
ACQUISITION     dmf       200
sfrq      499.693 dseq
tn         H1 dres       1.0
at         4.665 homo    n
np         65536          }
sw         7024.9 dfrq2  0
fb         4000 dn2
bs         4 dpwr2       1
tpwr      63 dof2        0
pw         6.5 dm2       n
dl         0 dmm2        c
tof        2.0 dmf2      200
nt         1 dseq2
ct         1 dres2       1.0
alock     n homo2       n
gain      not used      PROCESSING
FLAGS      lb          0.30
il         n wtfile
in         n proc      ft
dp         y fn        not used
hs         nn math     f
DISPLAY
sp        -250.0 werr
wp        5496.6 wexp
vs         347 wbs
sc         0 wnt
wc         250
hzmm      21.99
is        599.95
rfl       1011.9
rfp       0
th        7
ins       1.000
ai        ph
```

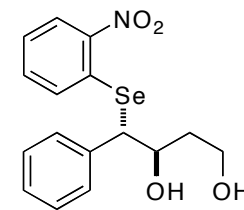

24f

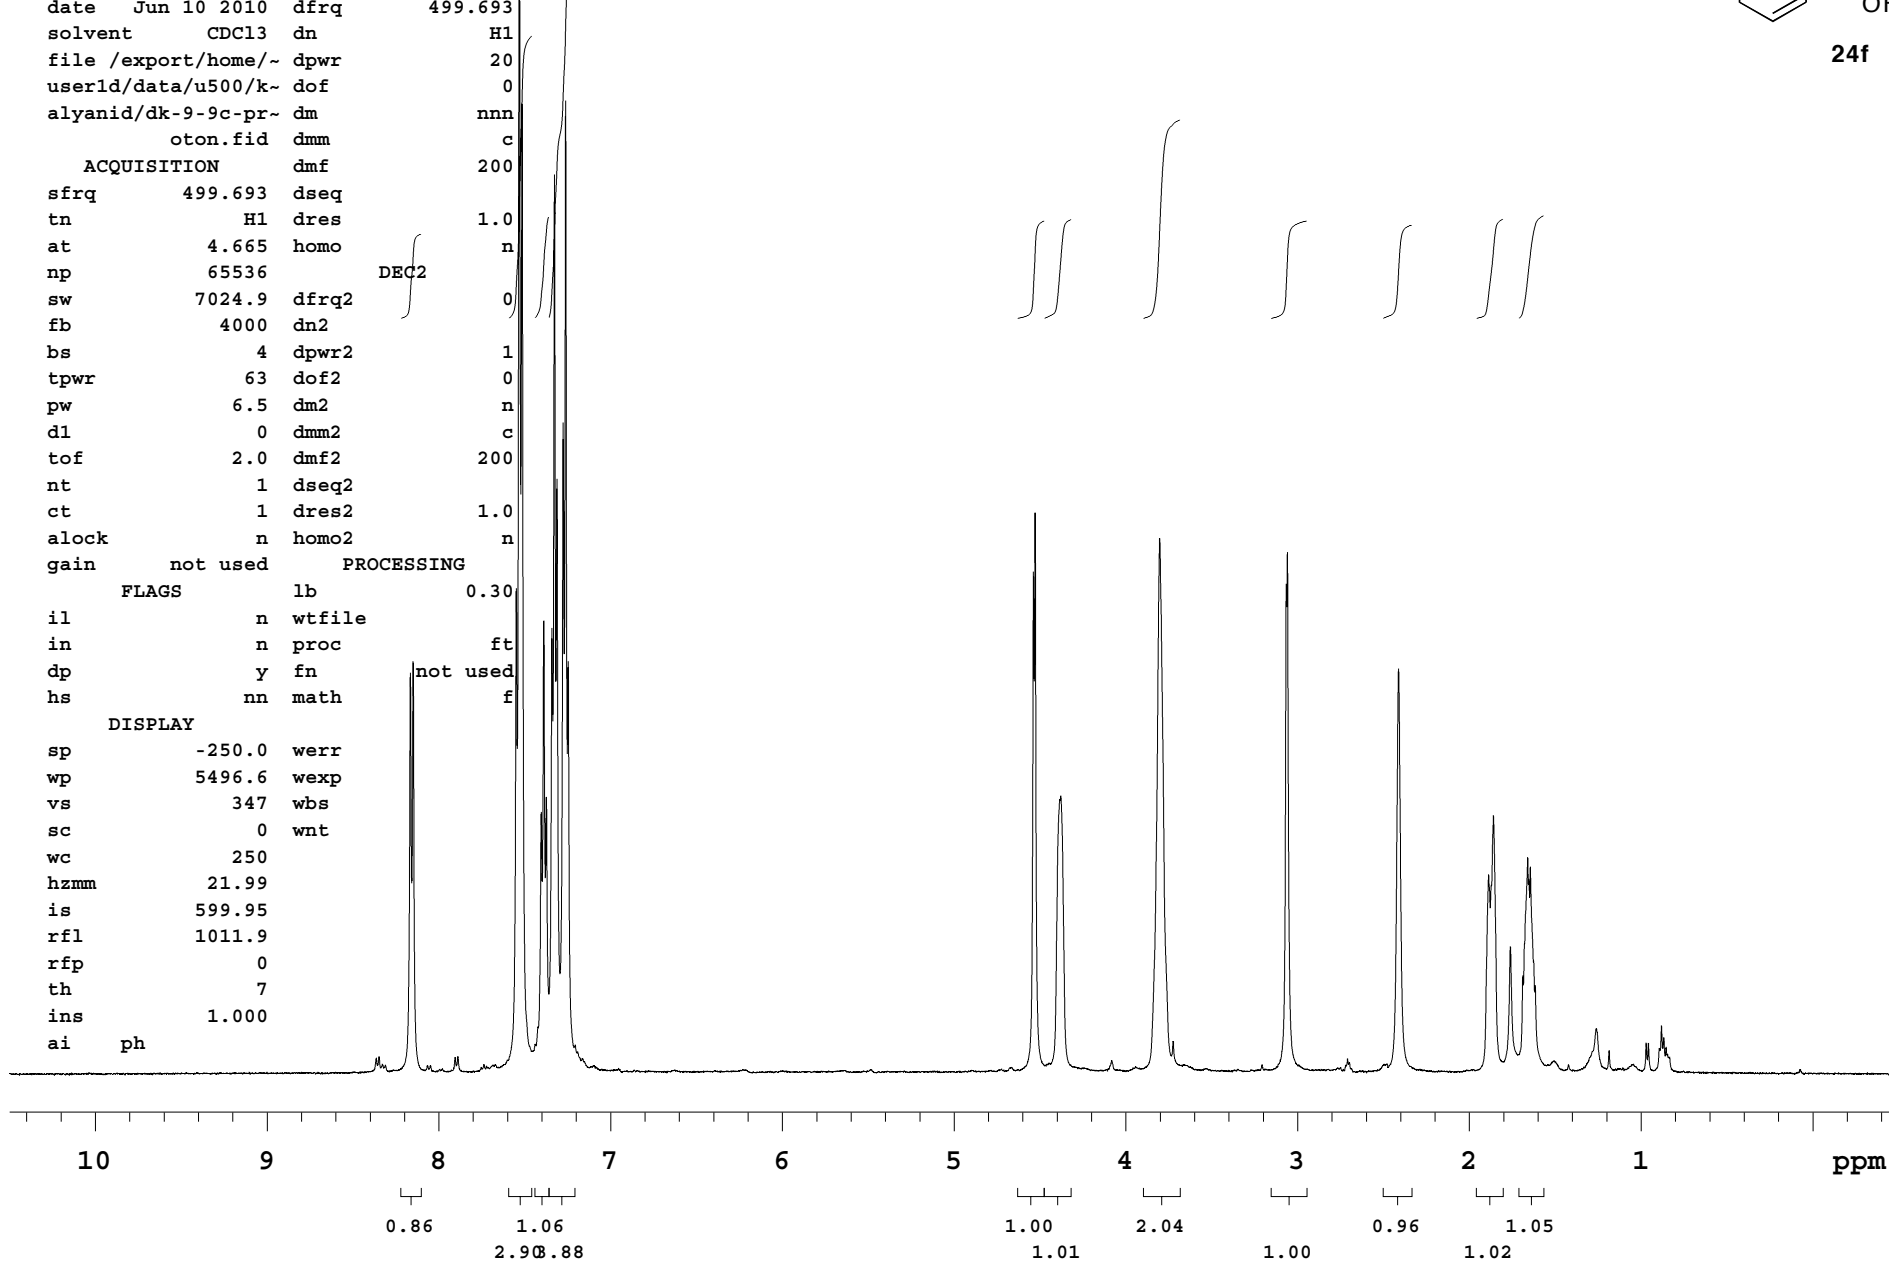

1H-24g

exp1 s2pul

```
SAMPLE          DEC. & VT
date Feb 13 2010 dfrq      500.070
solvent CDC13 dn         H1
file /export/home/~ dpwr   18
userid/data/ui500n~ dof    0
b/kalyanid/dk-6-90~ dm    nnn
c.fid dmm c
ACQUISITION     dmf      200
sfrq 500.070 dseq
tn H1 dres 1.0
at 4.096 homo n
np 65536 DEC2
sw 8000.0 dfrq2 0
fb 4000 dn2
bs 16 dpwr2 1
tpwr 55 dof2 0
pw 9.0 dm2 n
dl 0 dmm2 c
tof 0 dmf2 200
nt 1 dseq2
ct 1 dres2 1.0
alock n homo2 n
gain not used PROCESSING
FLAGS lb 0.30
il n wtfile
in n proc ft
dp y fn not used
hs nn math f
DISPLAY
sp -250.1 werr
wp 5500.7 wexp
vs 197 wbs
sc 0 wnt
wc 250
hzmm 22.00
is 345.73
rfl 1499.6
rfp 0
th 7
ins 1.000
ai ph
```

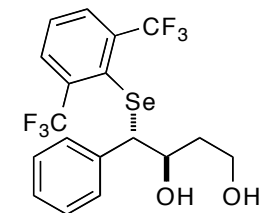

24g

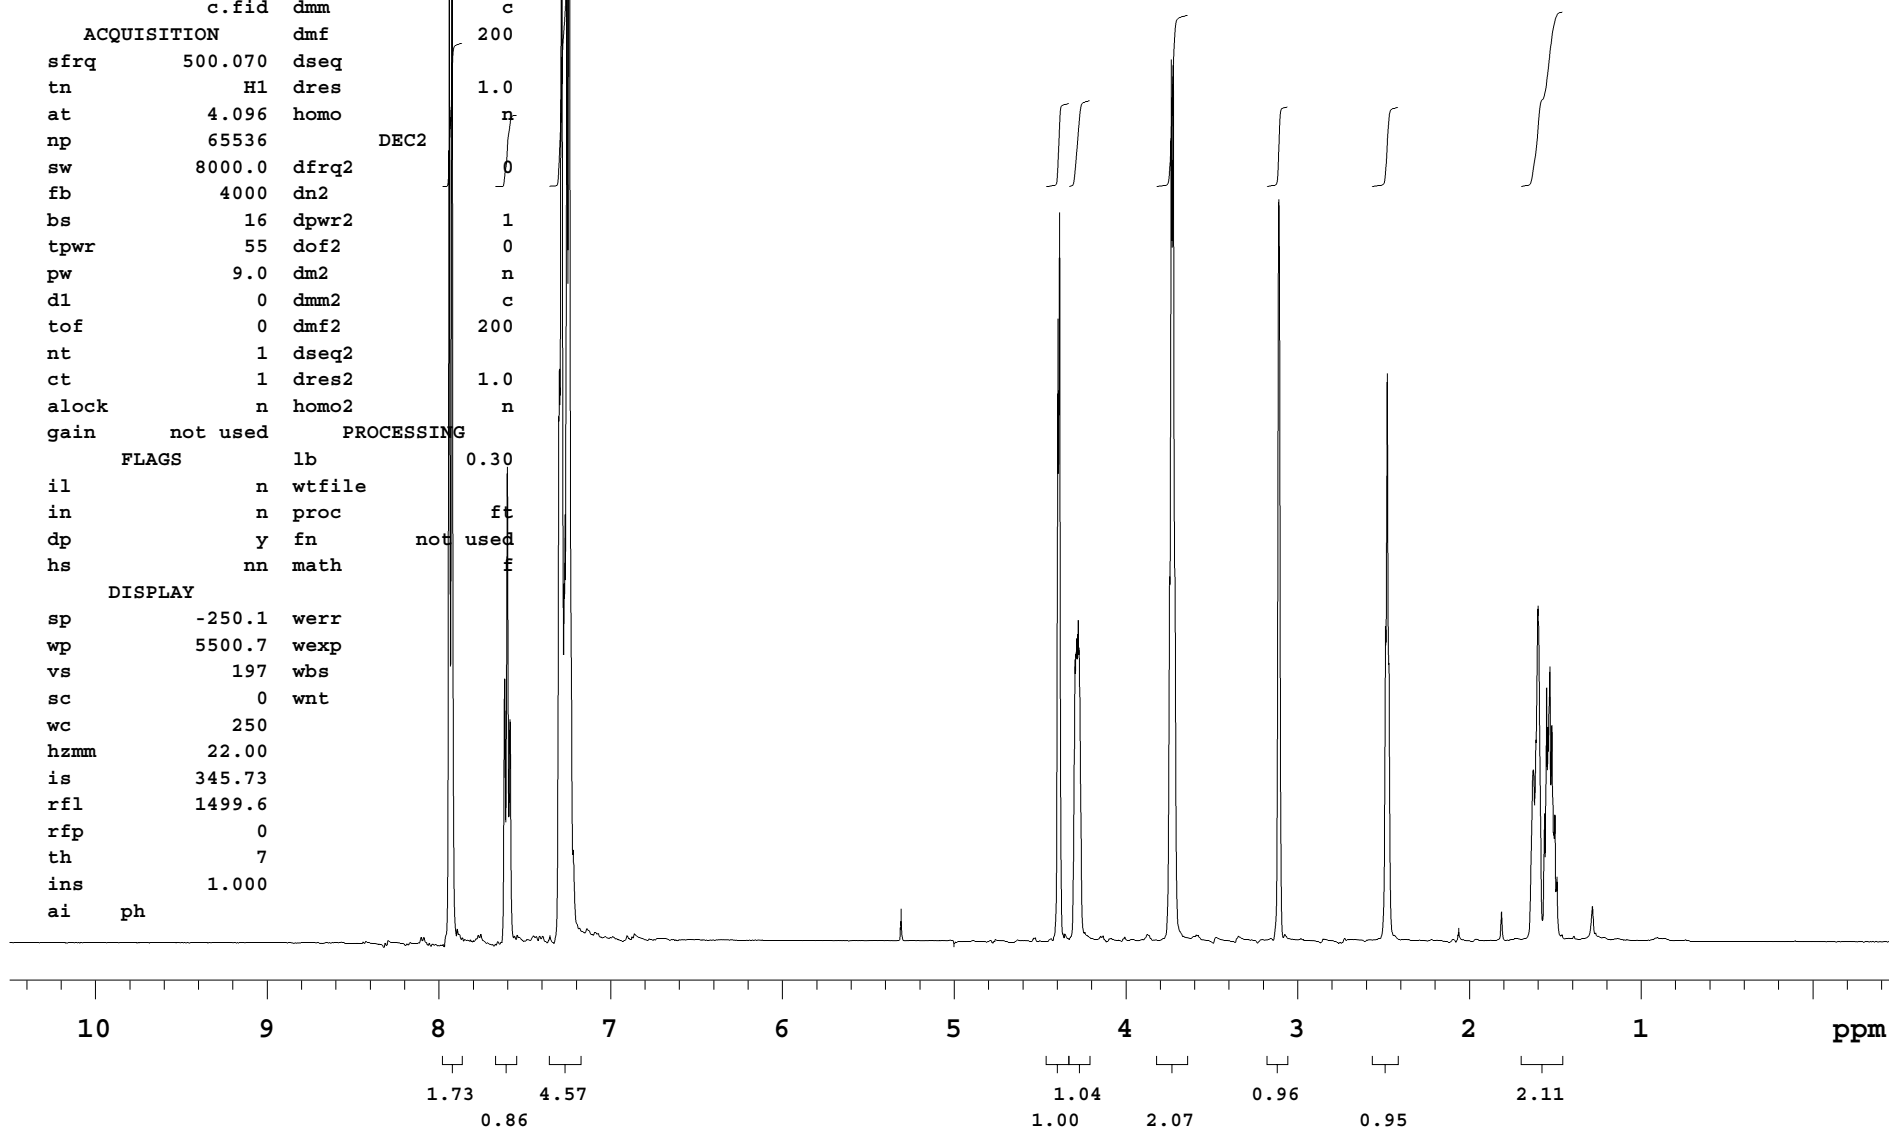

1H-28a

exp1 s2pul

SAMPLE DEC. & VT  
date May 25 2010 dfrq 499.693  
solvent CDC13 dn H1  
file /export/home/~ dpwr 20  
userid/data/u500/k~ dof 0  
alyanid/dk-8-72c.f~ dm nnn  
id dmm c

ACQUISITION dmf 200  
sfrq 499.693 dseq  
tn H1 dres 1.0  
at 4.665 homo n  
np 65536 temp 25.0  
sw 7024.9 DEC2  
fb 4000 dfrq2 0  
bs 4 dn2  
tpwr 63 dpwr2 1  
pw 6.5 dof2 0  
dl 0 dm2 n  
tof 2.0 dmm2 c  
nt 1 dmf2 200  
ct 1 dseq2  
alock n dres2 1.0  
gain not used homo2 n

FLAGS PROCESSING  
il n lb 0.30  
in n wtf file  
dp y proc ft  
hs nn fn not used

DISPLAY math f  
sp -250.0  
wp 5496.6 werr  
vs 141 wexp  
sc 0 wbs  
wc 250 wnt  
hzmm 21.99  
is 276.53  
rfl 1011.9  
rfp 0  
th 7  
ins 1.000  
ai ph

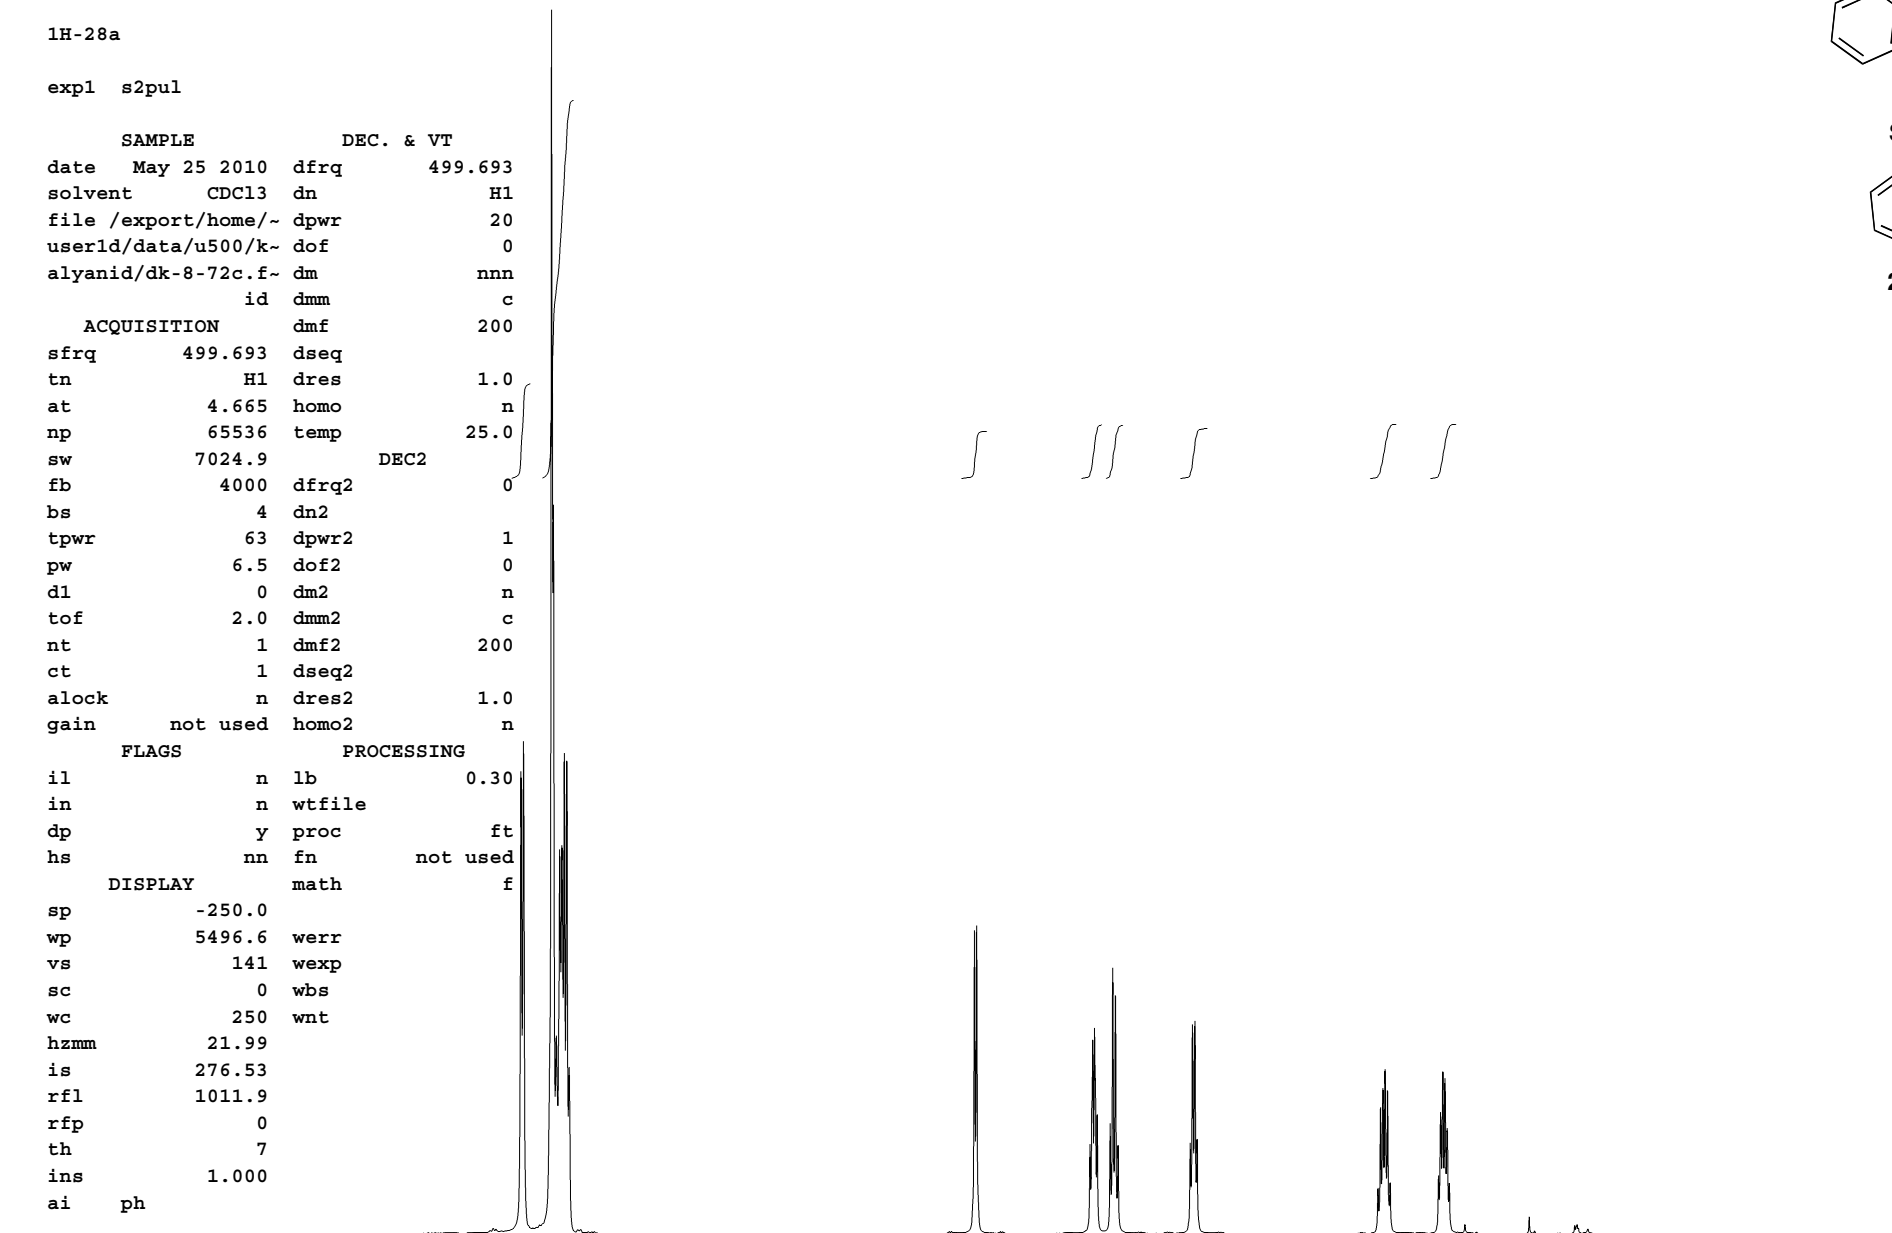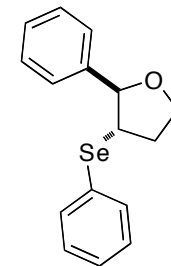

28a

2.02  
8.05

1.01

1.13  
1.14

1.06

1.16

1.15

1H-28b

exp1 s2pul

SAMPLE DEC. & VT  
date May 2 2009 dfrq 499.693  
solvent CDC13 dn H1  
file /export/home/~ dpwr 20  
userid/data/u500/k~ dof 0  
alyanid/dk-1-60-48~ dm nnn  
-57-concentrated.f~ dmm c  
id dmf 200

ACQUISITION  
sfrq 499.693 dres 1.0  
tn H1 homo n  
at 4.665 DEC2  
np 65536 dfrq2 0  
sw 7024.9 dn2  
fb 4000 dpwr2 1  
bs 4 dof2 0  
tpwr 63 dm2 n  
pw 6.5 dmm2 c  
dl 0 dmf2 200  
tof 2.0 dseq2  
nt 1 dres2 1.0  
ct 1 homo2 n

alock n PROCESSING  
gain not used lb 0.30

FLAGS wtf file  
il n proc ft  
in n fn not used  
dp y math f  
hs nn

DISPLAY werr  
sp -250.0 wexp  
wp 5496.6 wbs  
vs 52 wnt  
sc 0  
wc 250  
hzmm 21.99  
is 456.74  
rfl 1011.9  
rfp 0  
th 7  
ins 1.000  
ai ph

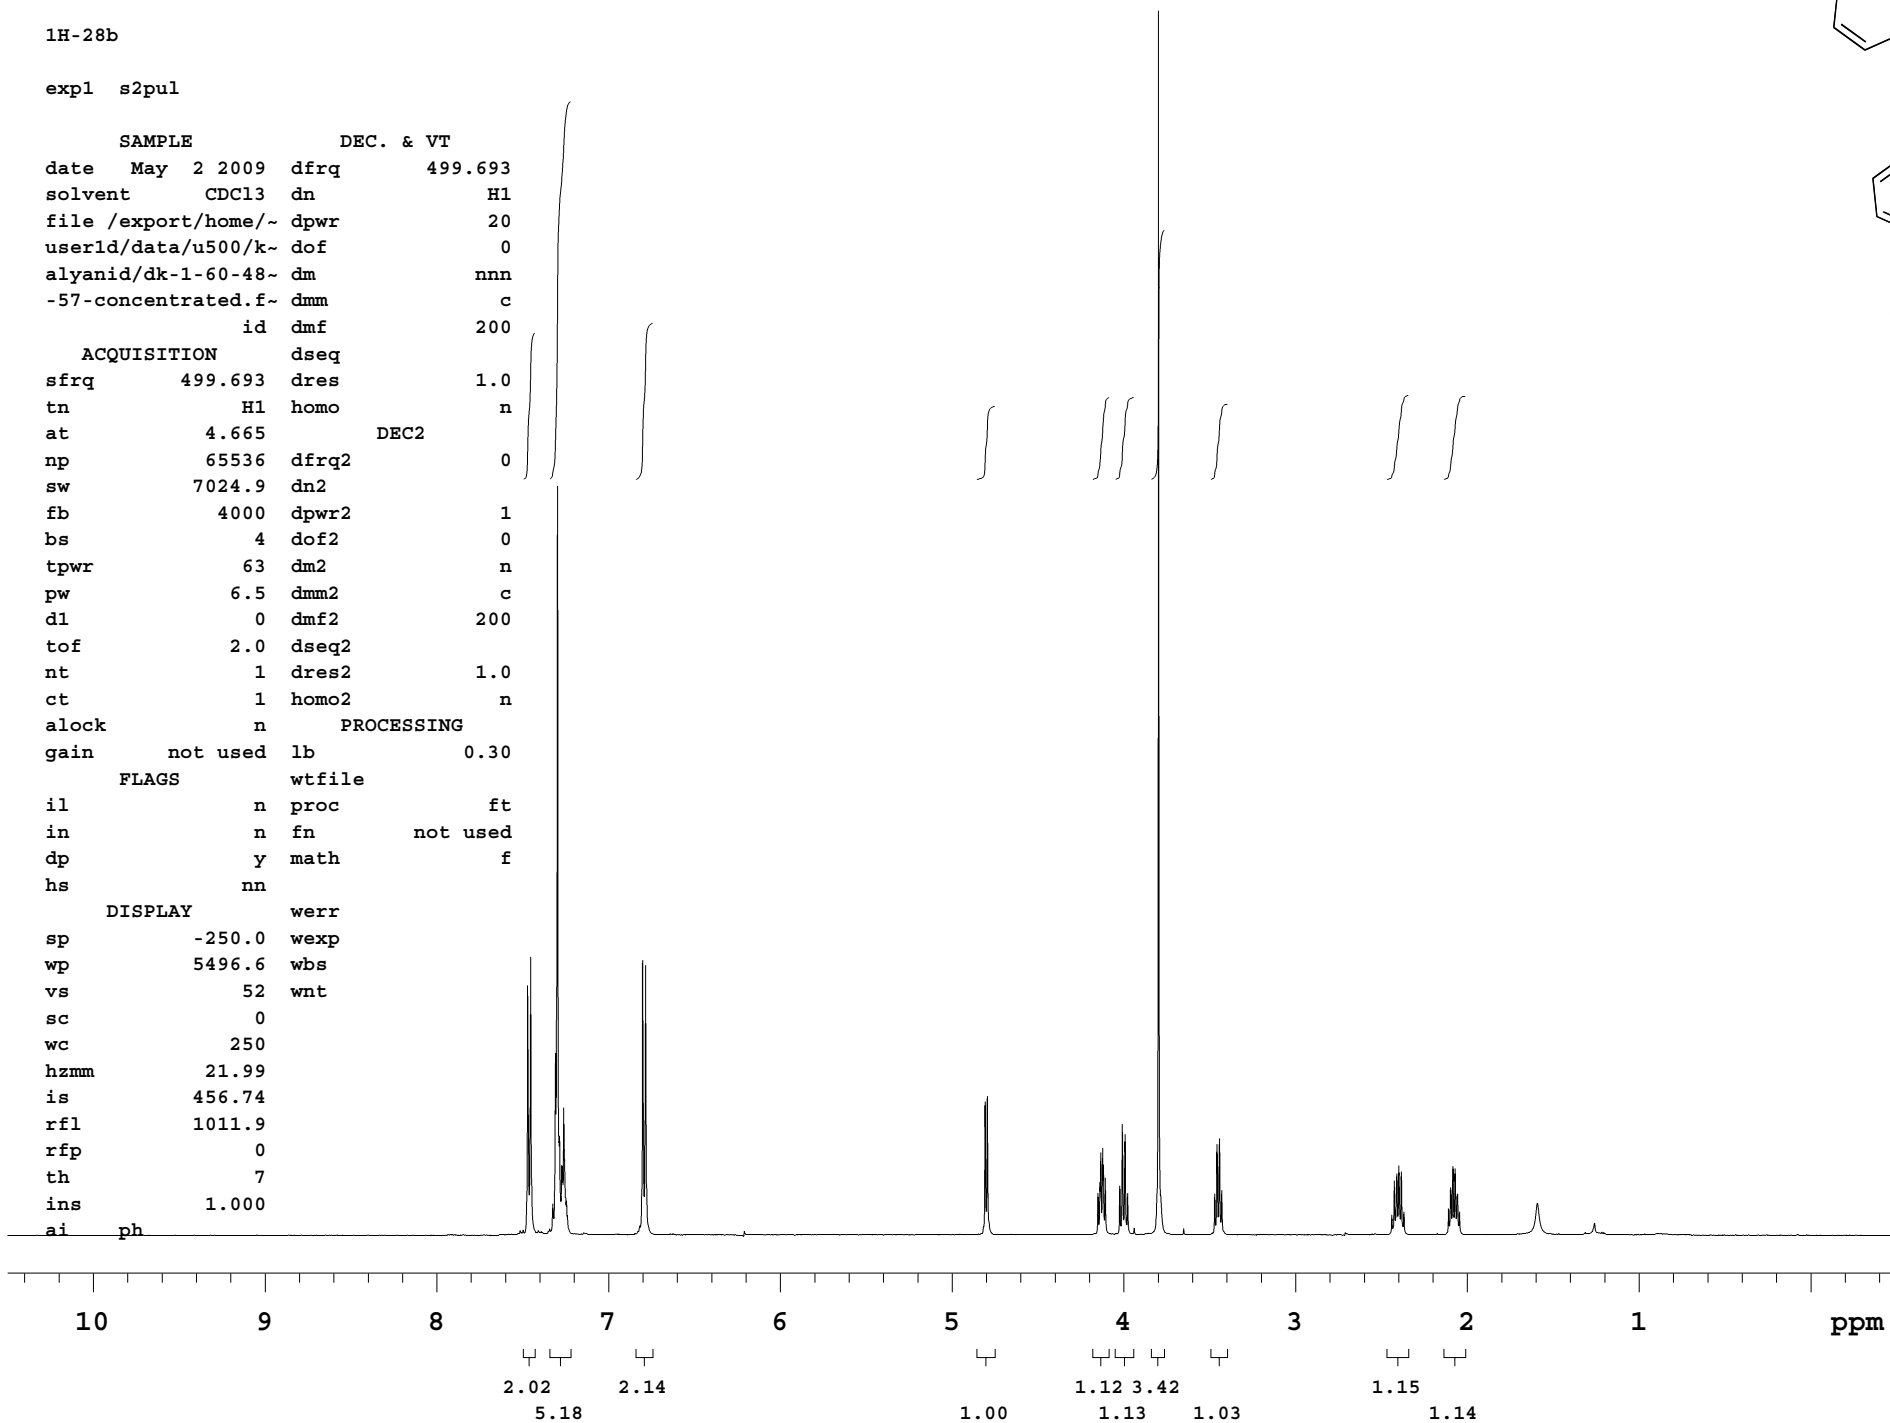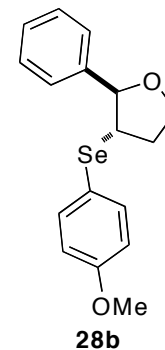

1H-28c

exp1 s2pul

SAMPLE DEC. & VT  
date May 22 2010 dfrq 499.693  
solvent CDC13 dn H1  
file /export/home/~ dpwr 20  
userid/data/u500/k~ dof 0  
alyanid/dk-8-95c.f~ dm nnn  
id dmm c

ACQUISITION dmf 200  
sfrq 499.693 dseq  
tn H1 dres 1.0  
at 4.665 homo n  
np 65536 DEC2  
sw 7024.9 dfrq2 0  
fb 4000 dn2  
bs 4 dpwr2 1  
tpwr 63 dof2 0  
pw 6.5 dm2 n  
dl 0 dmm2 c  
tof 2.0 dmf2 200  
nt 2 dseq2  
ct 2 dres2 1.0  
alock n homo2 n

gain not used PROCESSING  
FLAGS lb 0.30  
il n wfile  
in n proc ft  
dp y fn not used  
hs nn math f

DISPLAY  
sp -250.0 werr  
wp 5496.6 wexp  
vs 51 wbs  
sc 0 wnt  
wc 250  
hzmm 21.99  
is 305.37  
rfl 1011.9  
rfp 0  
th 7  
ins 1.000  
ai ph

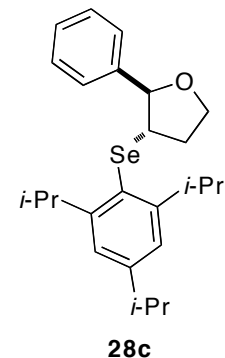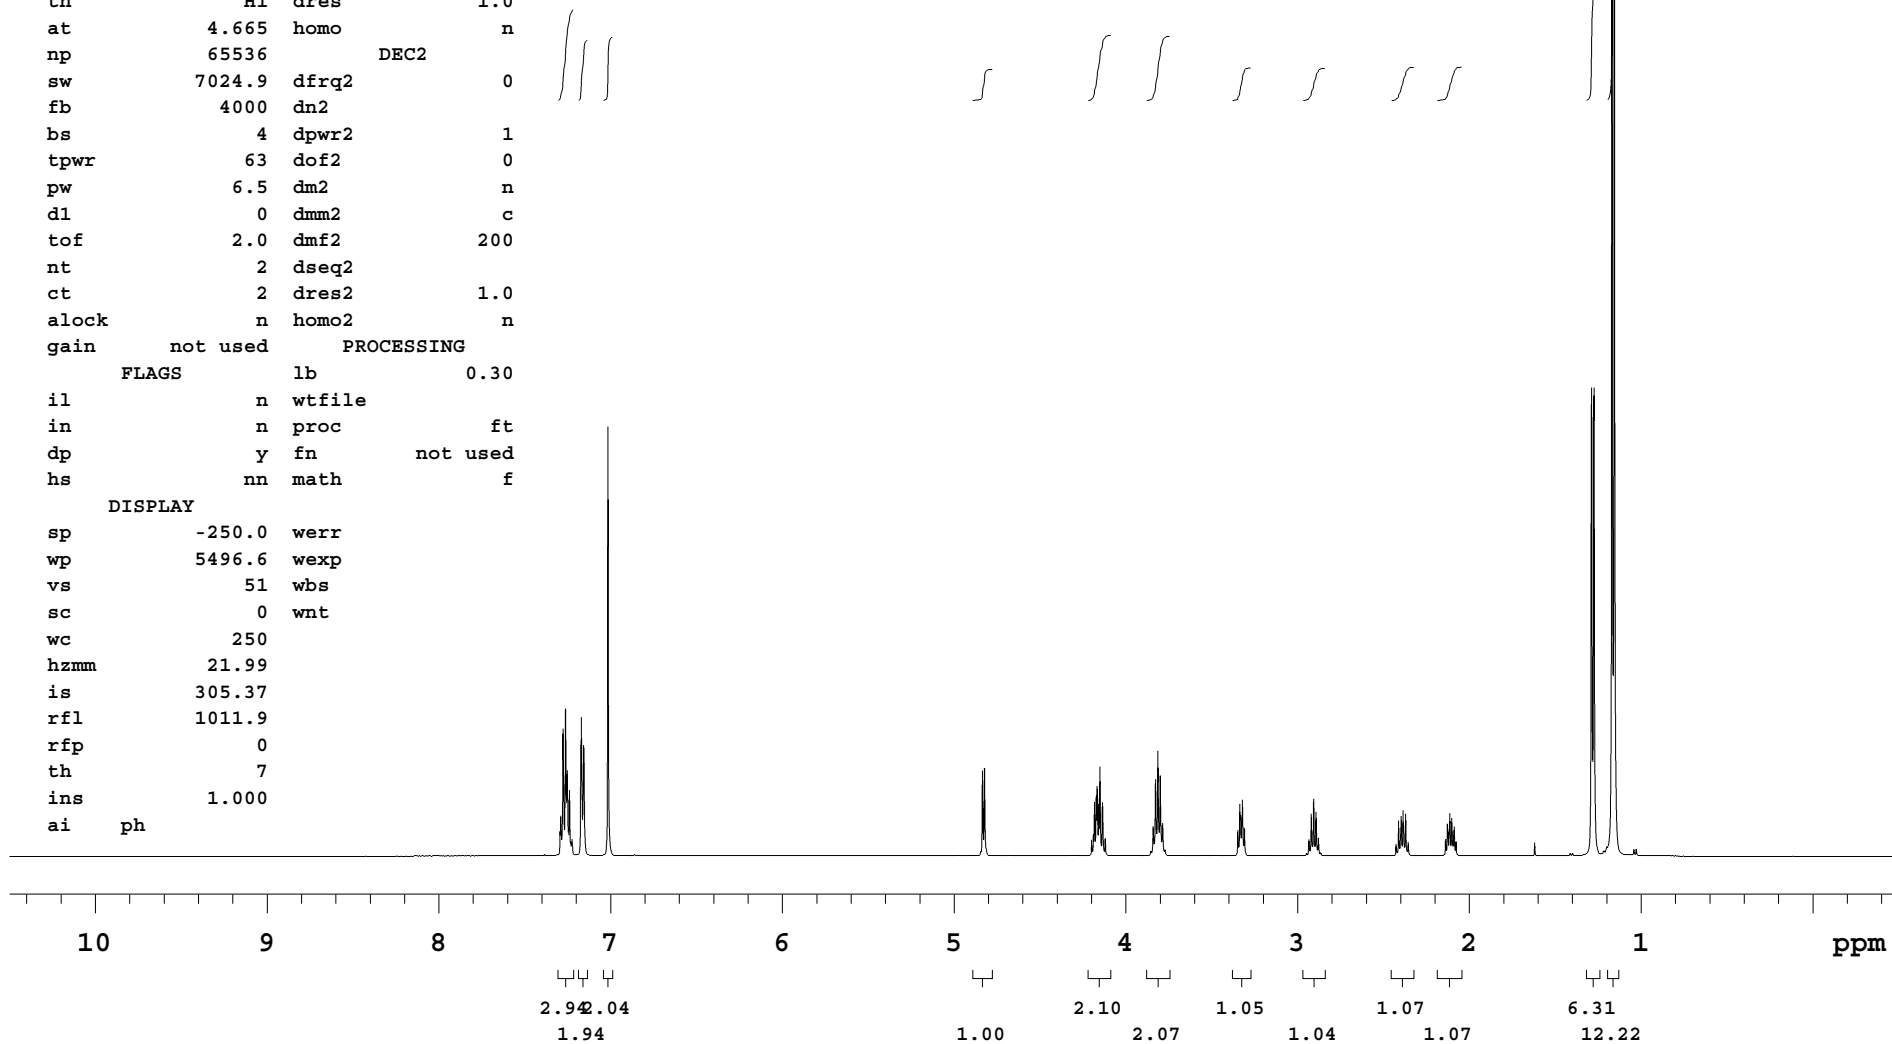



1H-28d

exp1 s2pul

SAMPLE DEC. & VT  
date May 22 2010 dfrq 499.693  
solvent CDC13 dn H1  
file /export/home/~ dpwr 20  
userid/data/u500/k~ dof 0  
alyanid/dk-8-93c.f~ dm nnn  
id dmm c

ACQUISITION dmf 200  
sfrq 499.693 dseq  
tn H1 dres 1.0  
at 4.665 homo n  
np 65536 DEC2  
sw 7024.9 dfrq2 0  
fb 4000 dn2  
bs 4 dpwr2 1  
tpwr 63 dof2 0  
pw 6.5 dm2 n  
dl 0 dmm2 c  
tof 2.0 dmf2 200  
nt 2 dseq2  
ct 2 dres2 1.0  
alock n homo2 n

gain not used PROCESSING  
FLAGS lb 0.30  
il n wtfile  
in n proc ft  
dp y fn not used  
hs nn math f

DISPLAY  
sp -250.0 werr  
wp 5496.6 wexp  
vs 165 wbs  
sc 0 wnt  
wc 250  
hzmm 21.99  
is 422.55  
rfl 1011.9  
rfp 0  
th 7  
ins 1.000  
ai ph

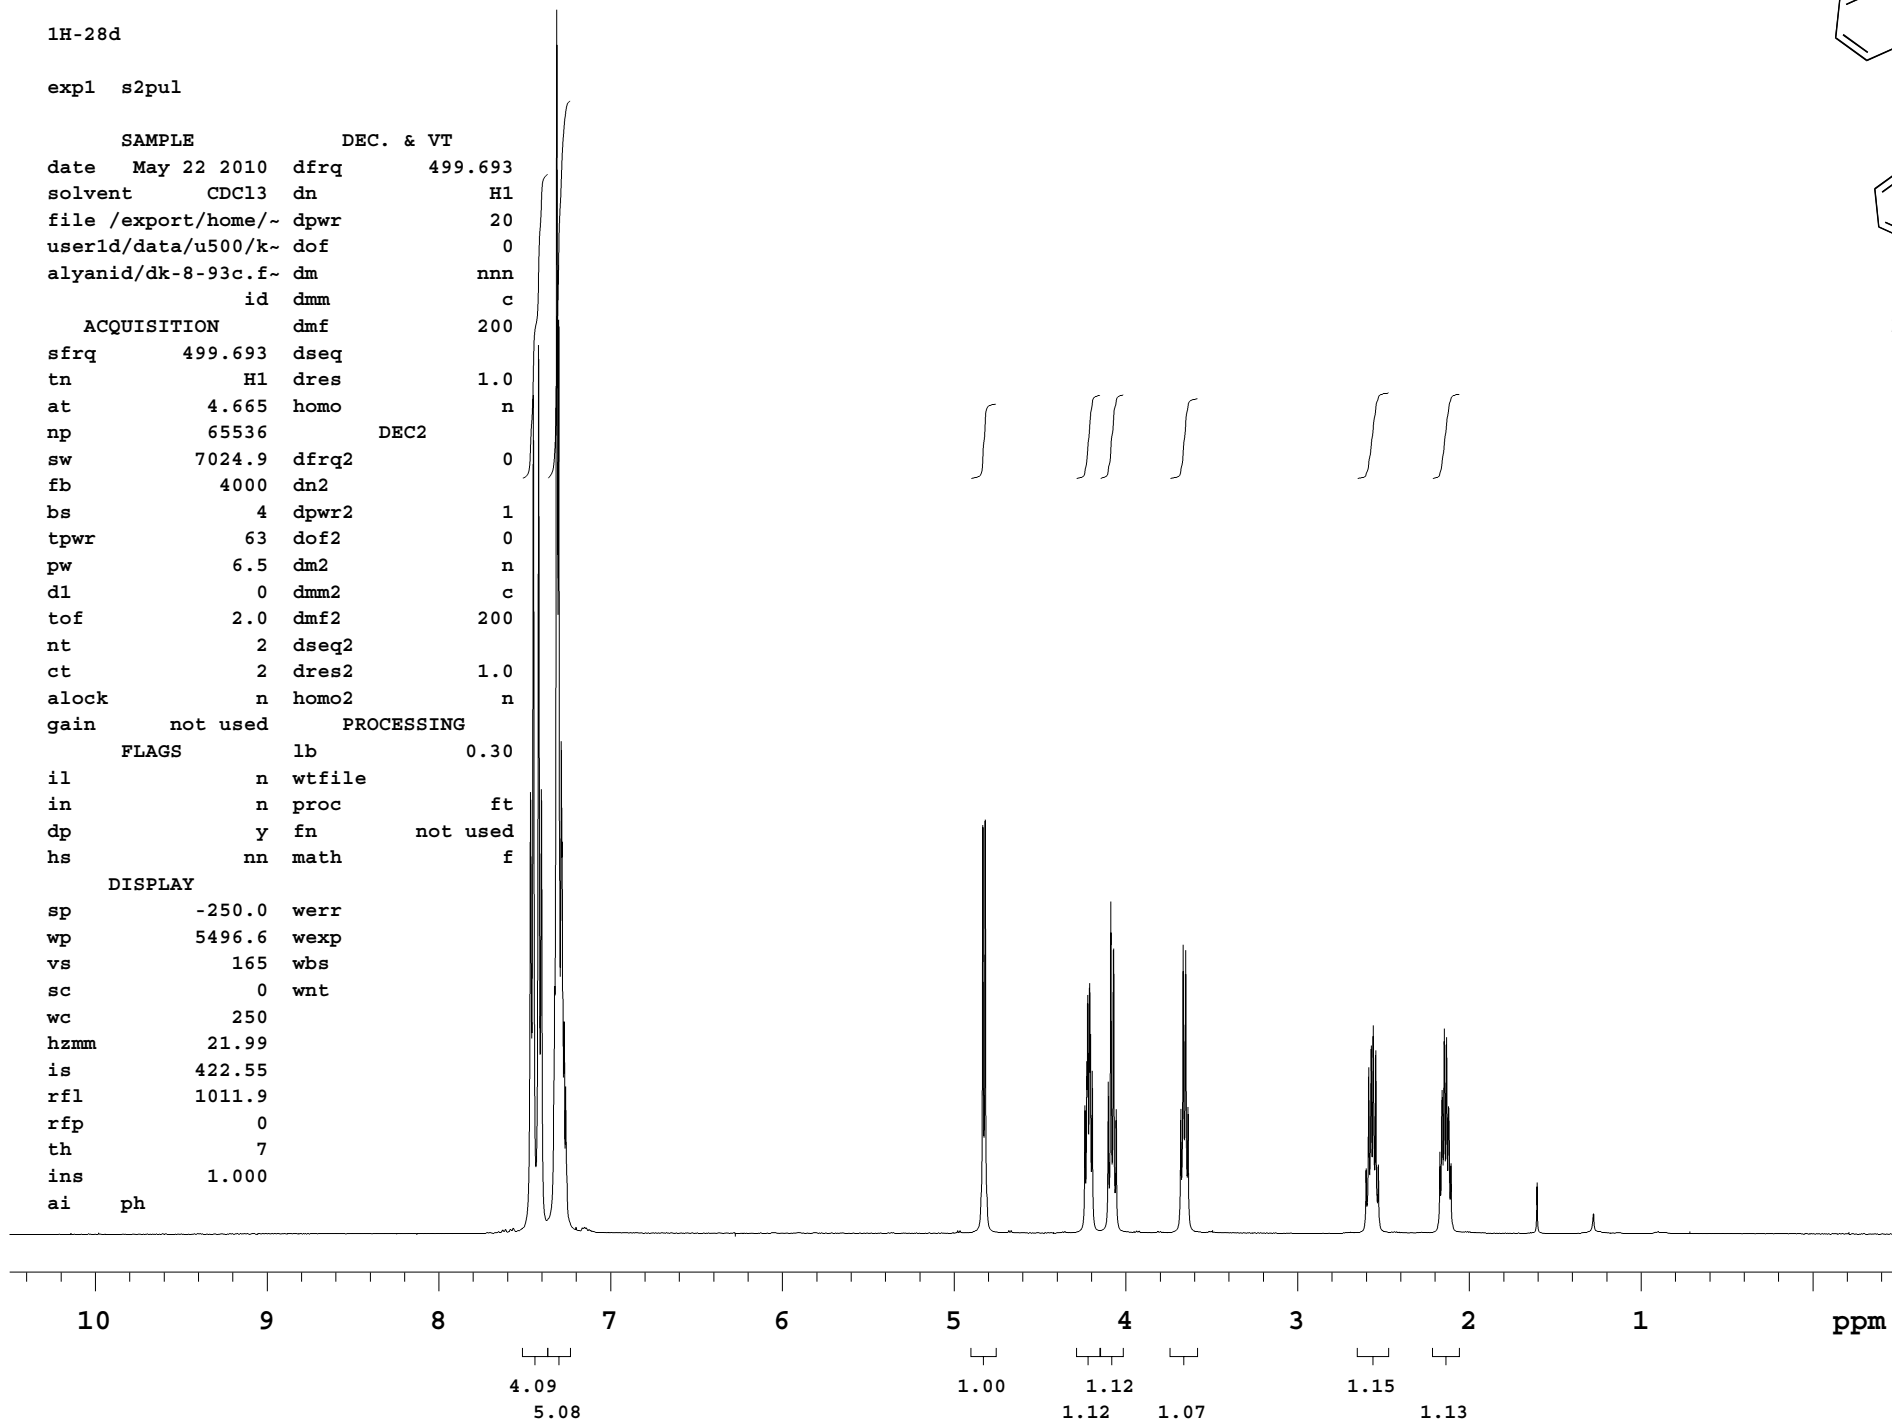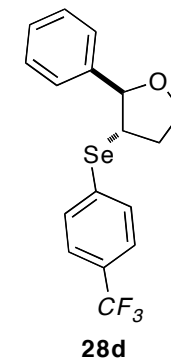

1H-28e

exp1 s2pul

SAMPLE DEC. & VT  
date May 24 2010 dfrq 499.693  
solvent CDC13 dn H1  
file /export/home/~ dpwr 20  
userid/data/u500/k~ dof 0  
alyanid/dk-8-92c.f~ dm nnn  
id dmm c

ACQUISITION dmf 200  
sfrq 499.693 dseq  
tn H1 dres 1.0  
at 4.665 homo n  
np 65536 DEC2  
sw 7024.9 dfrq2 0  
fb 4000 dn2  
bs 4 dpwr2 1  
tpwr 63 dof2 0  
pw 6.5 dm2 n  
dl 0 dmm2 c  
tof 2.0 dmf2 200  
nt 1 dseq2  
ct 1 dres2 1.0  
alock n homo2 n

gain not used PROCESSING  
FLAGS lb 0.30  
il n wtfile  
in n proc ft  
dp y fn not used  
hs nn math f

DISPLAY  
sp -250.0 werr  
wp 5496.6 wexp  
vs 116 wbs  
sc 0 wnt  
wc 250  
hzmm 21.99  
is 259.99  
rfl 1011.9  
rfp 0  
th 7  
ins 1.000  
ai ph

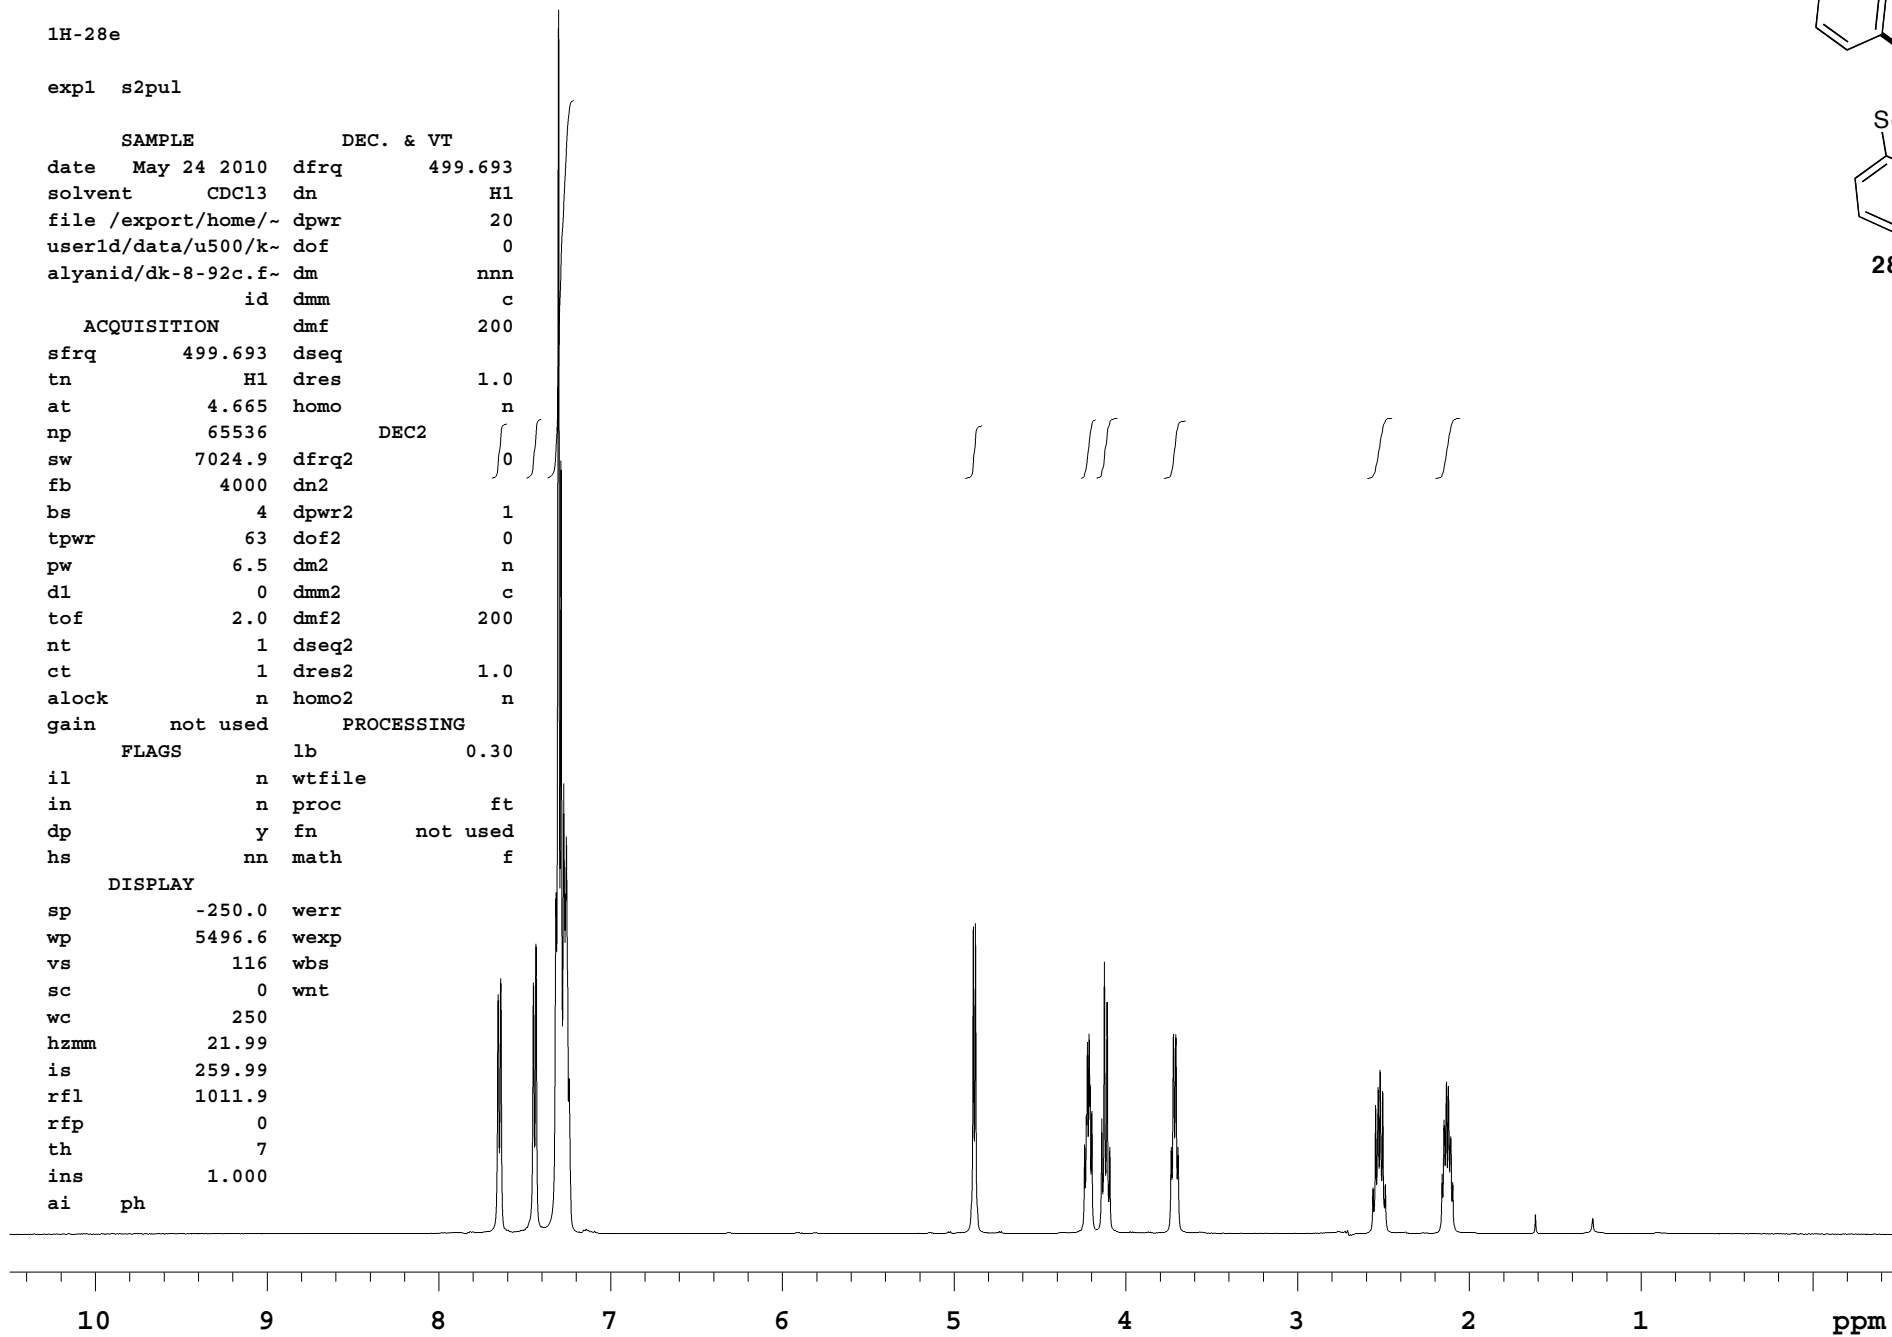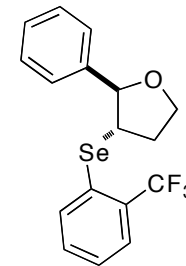

28e

1H-28g

exp1 s2pul

SAMPLE DEC. & VT  
date May 27 2010 dfrq 499.693  
solvent CDC13 dn H1  
file /export/home/~ dpwr 20  
userid/data/u500/k~ dof 0  
alyanid/dk-8-97.fi~ dm nnn  
d dmm c

ACQUISITION dmf 200  
sfrq 499.693 dseq  
tn H1 dres 1.0  
at 4.665 homo n  
np 65536 DEC2  
sw 7024.9 dfrq2 0  
fb 4000 dn2  
bs 4 dpwr2 1  
tpwr 63 dof2 0  
pw 6.5 dm2 n  
dl 0 dmm2 c  
tof 2.0 dmf2 200  
nt 32 dseq2  
ct 17 dres2 1.0  
alock n homo2 n  
gain not used

PROCESSING  
FLAGS lb 0.30  
il n wtfile  
in n proc ft  
dp y fn not used  
hs nn math f

DISPLAY  
sp -250.0 werr  
wp 5496.6 wexp  
vs 190 wbs  
sc 0 wnt  
wc 250  
hzmm 21.99  
is 1371.23  
rfl 1011.9  
rfp 0  
th 7  
ins 1.000  
ai ph

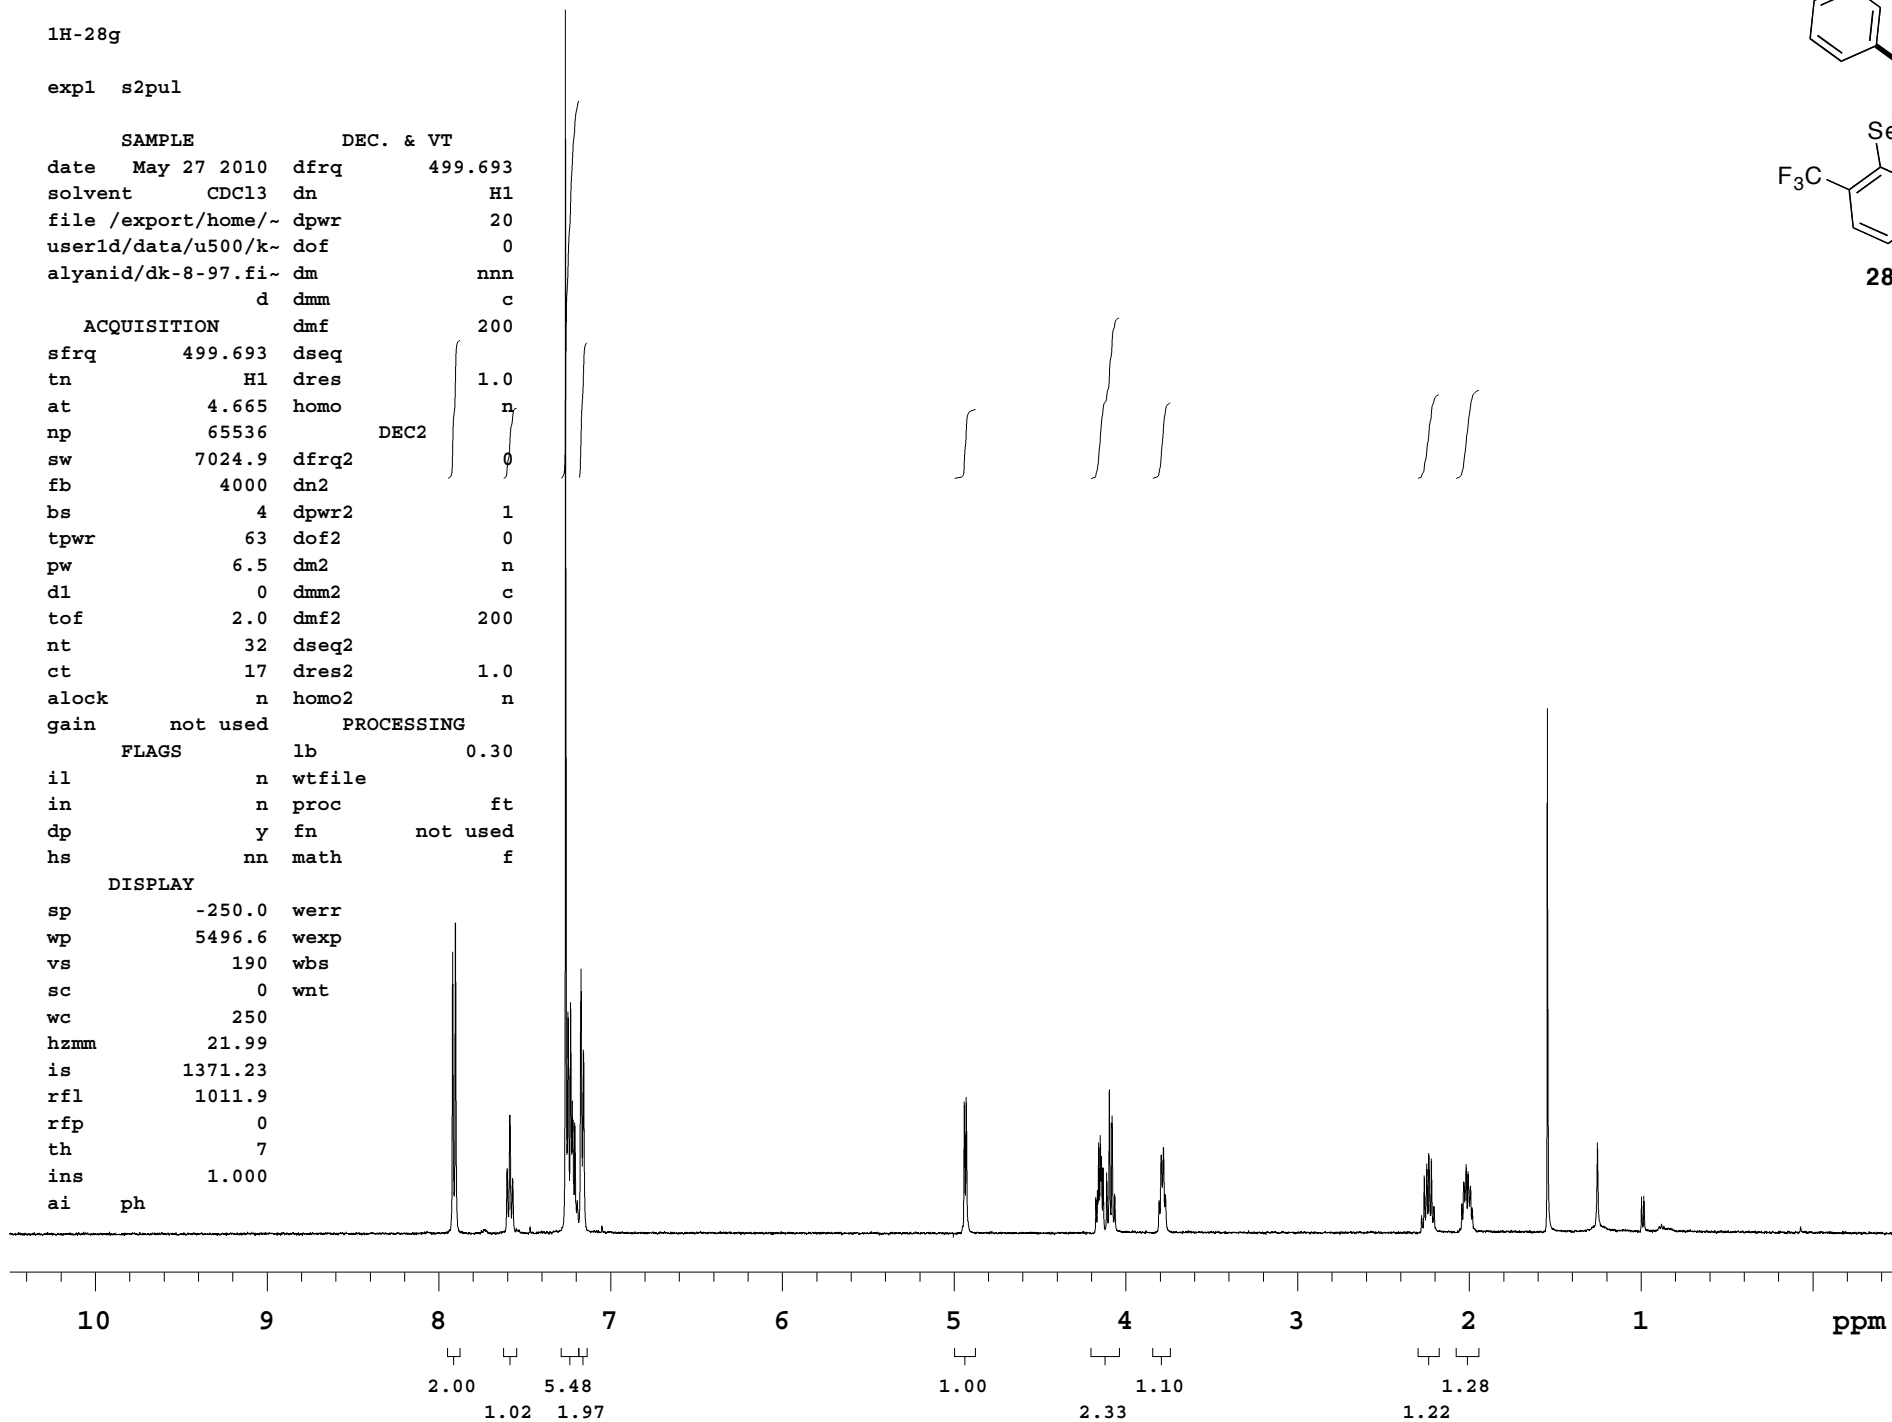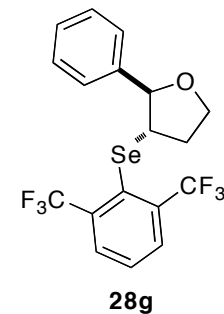

1H-41

exp1 s2pul

SAMPLE DEC. & VT  
date May 8 2010 dfrq 499.693  
solvent CDCl3 dn H1  
file /export/home/~ dpwr 20  
userid/data/u500/k~ dof 0  
alyanid/dk-8-59c-4~ dm nnn  
0-47.fid dmm c

ACQUISITION dmf 200  
sfrq 499.693 dseq  
tn H1 dres 1.0  
at 4.665 homo n  
np 65536 DEC2  
sw 7024.9 dfrq2 0  
fb 4000 dn2  
bs 4 dpwr2 1  
tpwr 63 dof2 0  
pw 6.5 dm2 n  
dl 0 dmm2 c  
tof 2.0 dmf2 200  
nt 32 dseq2  
ct 32 dres2 1.0  
alock n homo2 n

gain not used PROCESSING  
FLAGS lb 0.30  
il n wtfile  
in n proc ft  
dp y fn not used  
hs nn math f

DISPLAY  
sp -250.0 werr  
wp 5496.6 wexp  
vs 265 wbs  
sc 0 wnt  
wc 250  
hzmm 21.99  
is 2350.60  
rfl 1011.9  
rfp 0  
th 7  
ins 1.000  
ai ph

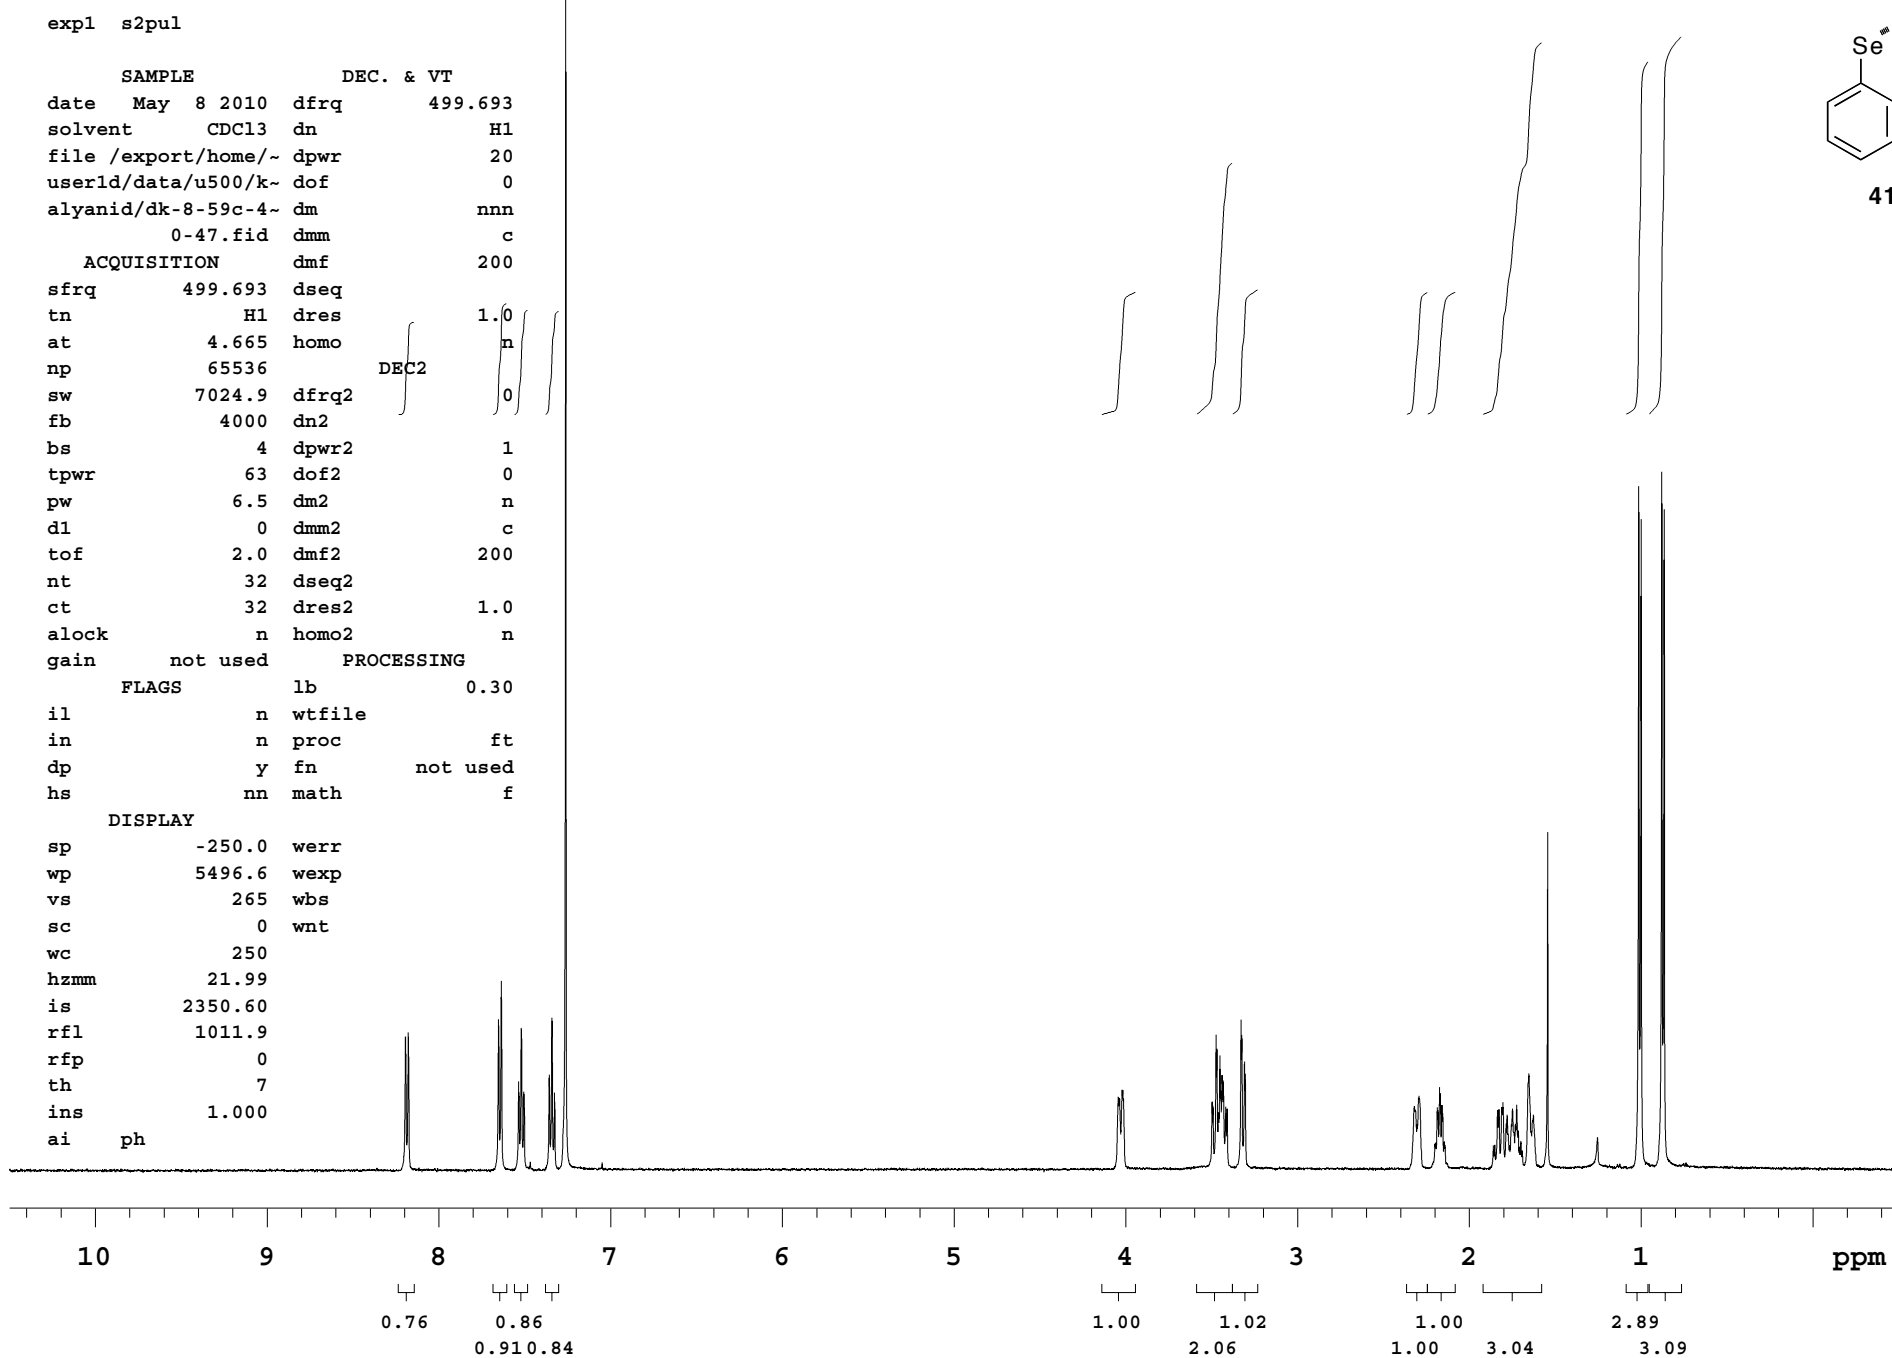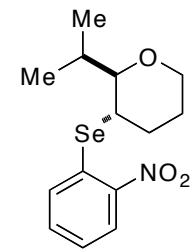

41

1H-43

expl std1h

| SAMPLE              |                | DEC. & VT  |          |
|---------------------|----------------|------------|----------|
| date                | Jun 19 2010    | dn         | H1       |
| solvent             | CDCl3          | dof        | 0        |
| file                | /export/home/~ | dm         | nnn      |
| data/ui400/Denmark~ | dmm            |            | c        |
| /kalyaniid/dk-9-44~ | dmf            |            | 200      |
| 6.5h.fid            | dpwr           |            | 20       |
| ACQUISITION         |                | PROCESSING |          |
| sfrq                | 399.741        | lb         | 0.30     |
| tn                  | H1             | wtfile     |          |
| at                  | 4.096          | proc       | ft       |
| np                  | 65536          | fn         | not used |
| sw                  | 8000.0         | math       | f        |
| fb                  | 4000           |            |          |
| bs                  | 16             | werr       |          |
| tpwr                | 61             | wexp       |          |
| pw                  | 5.8            | wbs        |          |
| d1                  | 0              | wnt        |          |
| tof                 | -425.7         | DISPLAY    |          |
| nt                  | 1              | sp         | -199.9   |
| ct                  | 1              | wp         | 4397.0   |
| alock               | n              | vs         | 151      |
| gain                | not used       | sc         | 0        |
| FLAGS               |                | wc         | 250      |
| il                  | n              | hzmm       | 17.59    |
| in                  | n              | is         | 3828.24  |
| dp                  | y              | rfl        | 5322.5   |
| hs                  | nn             | rfp        | 2902.1   |
|                     |                | th         | 20       |
|                     |                | ins        | 1.000    |
|                     |                | nm         | ph       |

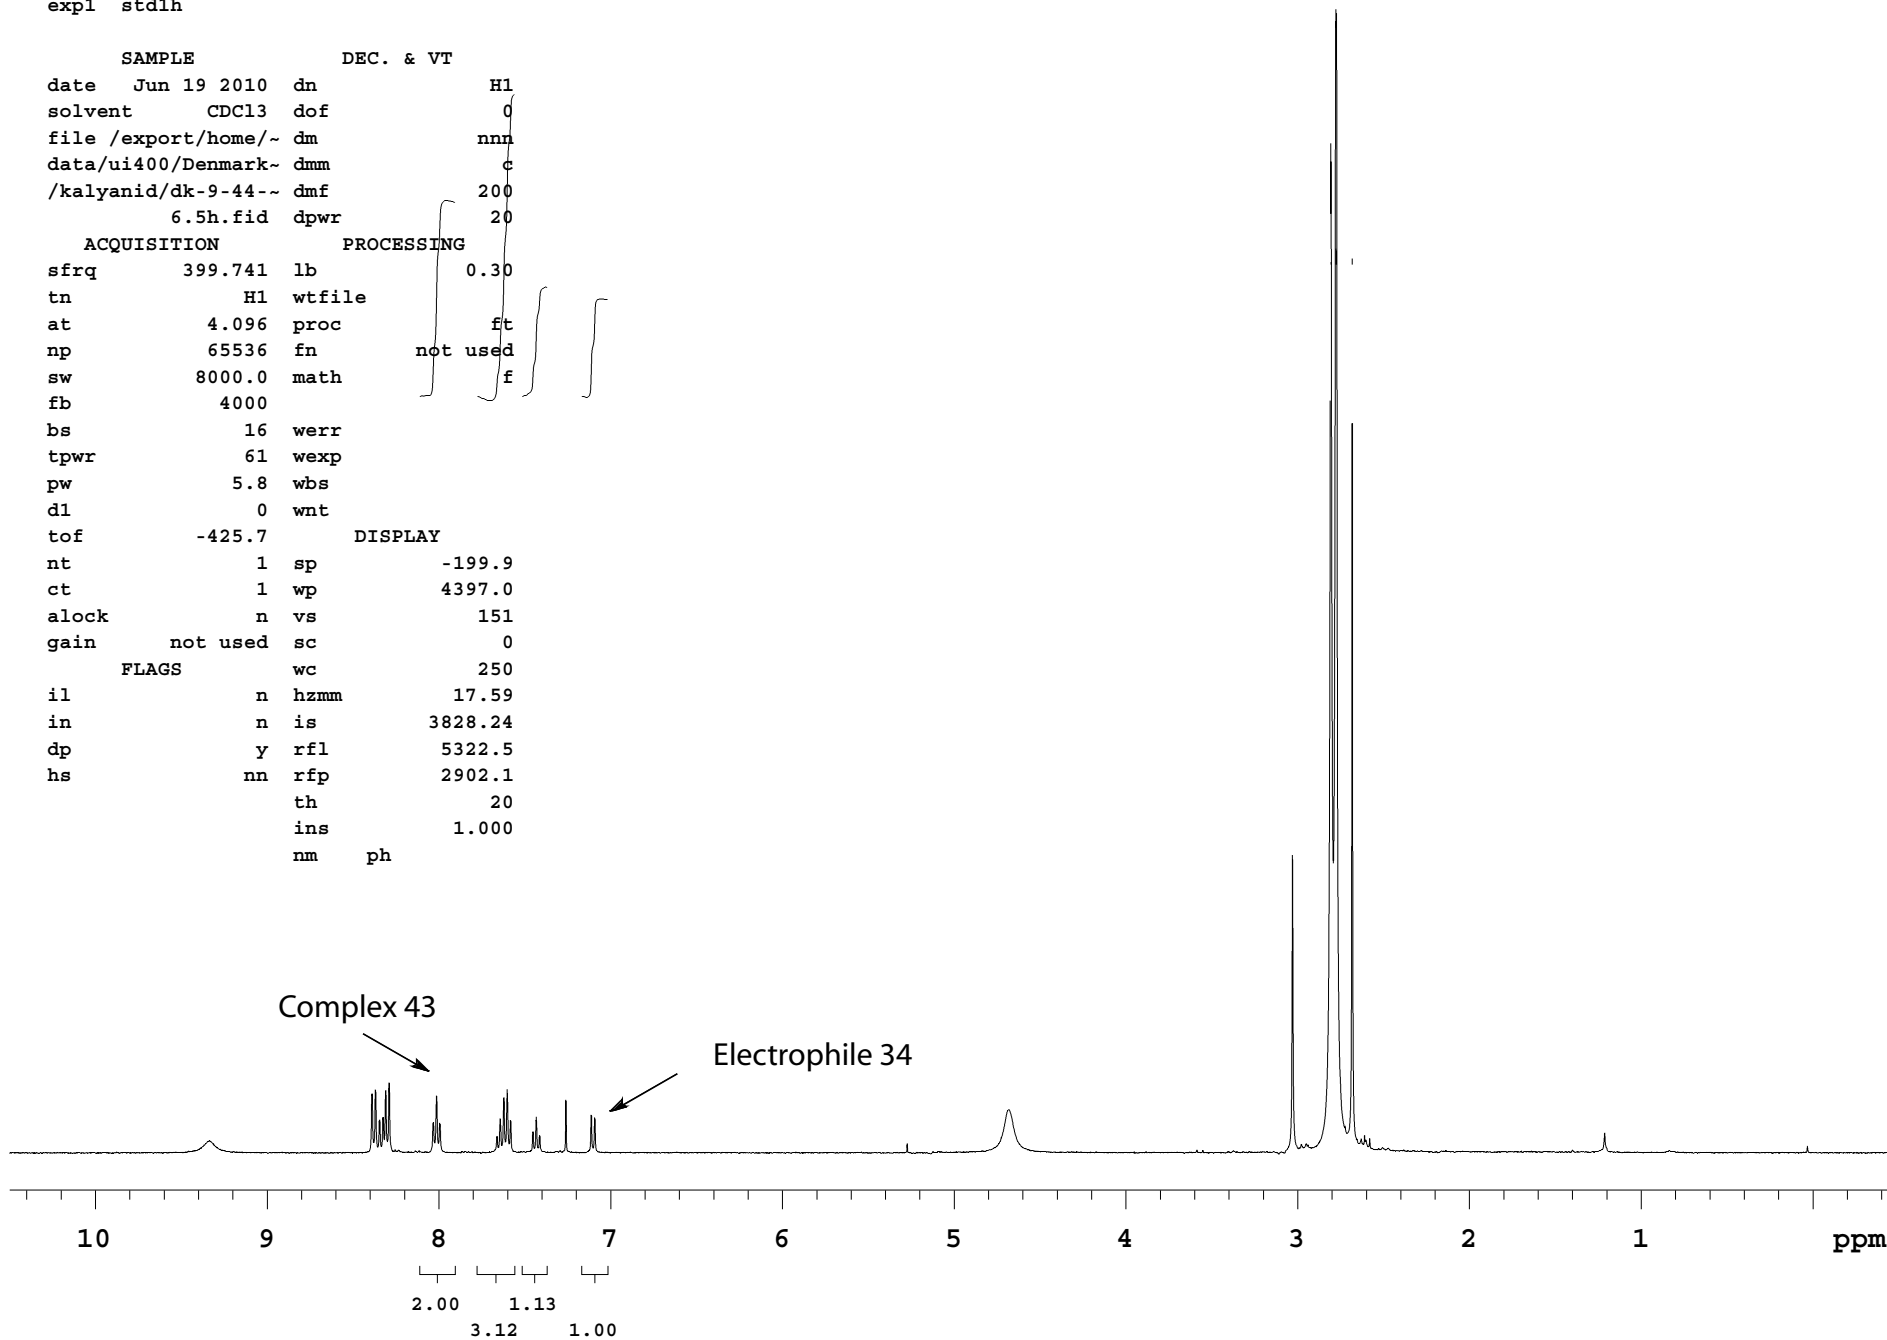

31P-43

exp1 s2pul

SAMPLE DEC. & VT  
date Jun 19 2010 dfrq 399.740  
solvent CDCl3 dn H1  
file /export/home/~ dpwr 49  
data/ui400/Denmark~ dof -1092.3  
/kalyanid/dk-9-44~ dm nny  
3h-P31-negative50.~ dmm w  
fid dmf 24691

ACQUISITION dseq  
sfrq 161.833 dres 1.0  
tn P31 homo n  
at 0.819 temp -50.0

np 55680 PROCESSING  
sw 33984.7 lb 3.00  
fb 19000 wtfile  
bs 16 proc ft  
tpwr 63 fn not used  
pw 6.4 math f

d1 1.000  
tof 14919.8 werr  
nt 10000 wexp  
ct 1216 wbs  
alock n wnt  
gain not used

FLAGS  
il n  
in n  
dp y  
hs nn

DISPLAY  
sp -1683.3  
wp 33983.7  
vs 162  
sc 0  
wc 250  
hzmm 135.93  
is 107.39  
rfl 1684.4  
rfp 0  
th 20  
ins 2.000

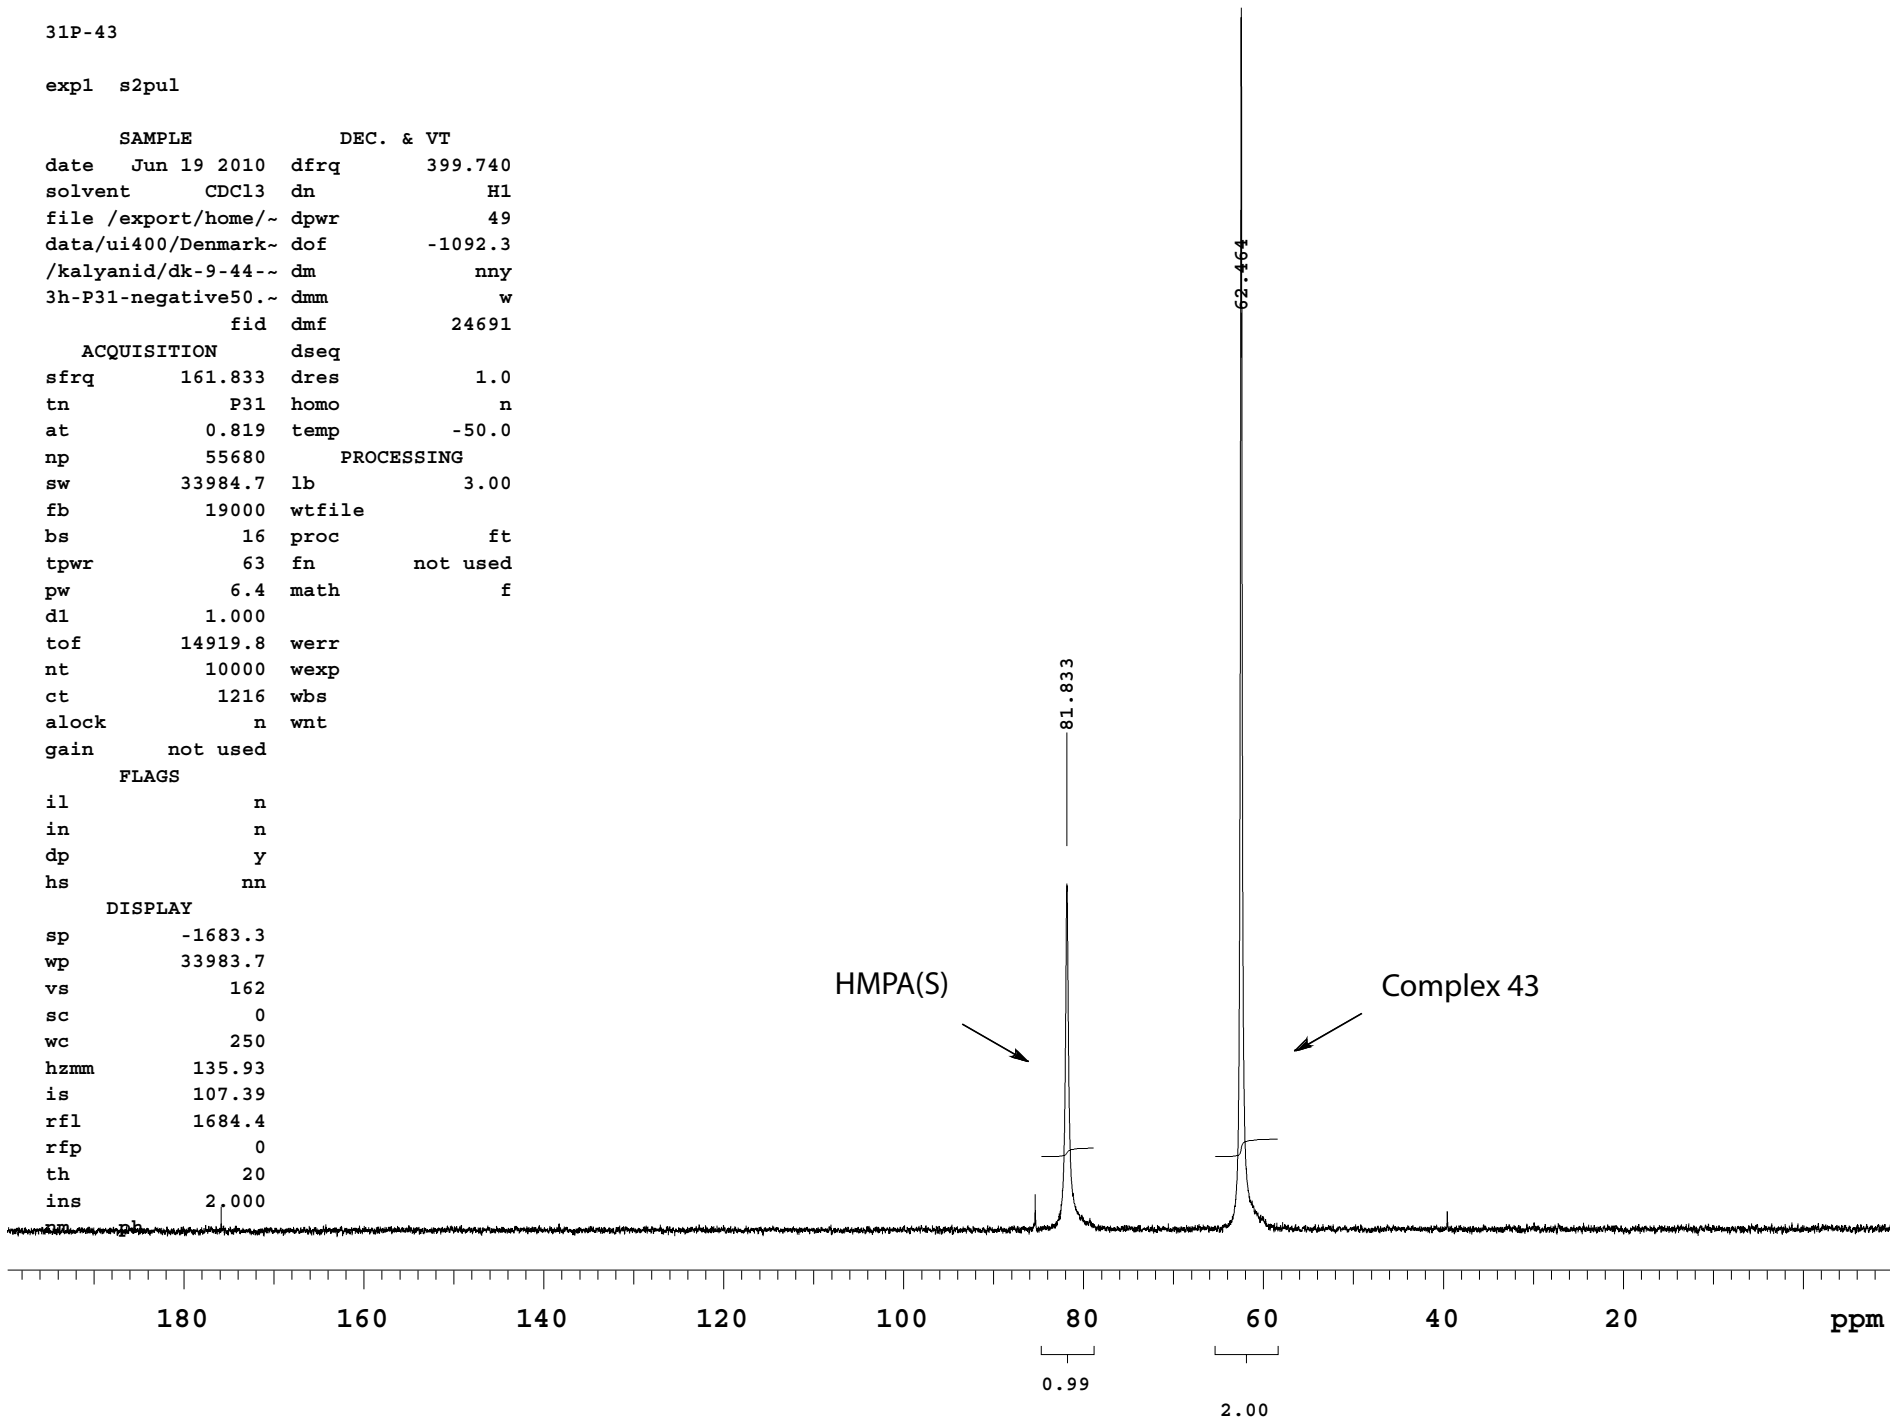

77Se-43

exp1 s2pul

```
SAMPLE      DEC. & VT
date Jun 19 2010 dfrq      599.764
solvent CDC13 dn          H1
file /export/home/~ dpwr      46
userid/data/ui600/~ dof      -1005.0
kalyanid/dk-9-44-3~ dm        nny
h-Se77.fid dmm          g
ACQUISITION dmf          17100
sfrq      114.452 dseq
tn         Se77 dres      1.0
at         1.235 homo     n
np         493980 DEC2
sw         200000.0 dfrq2   0
fb         110000 dn2
bs         16 dpwr2      1
tpwr      63 dof2       0
pw         7.5 dm2       n
dl         0 dmm2       c
tof       37814.0 dmf2    10000
nt         50000 dseq2
ct         3770 dres2    1.0
alock     n homo2      n
gain      60 PROCESSING
FLAGS     lb          3.00
il        n wtfile
in        n proc      ft
dp        y fn        not used
hs        nn math     f
DISPLAY
sp        194.0 werr
wp        137657.2 wexp
vs        447 wbs
sc        0 wnt
wc        250
hzmm     550.63
is        500.00
rfl      84182.7
rfp      52868.1
th        8
ins      100.000
```

582.207

722.710

Complex 43

Electrophile 34

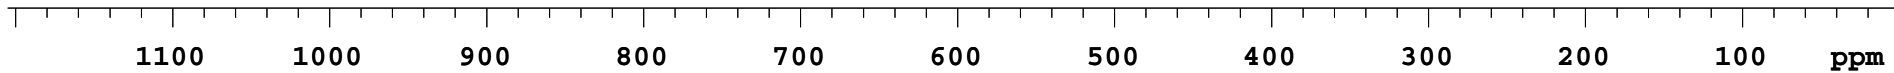

1H-44

expl stdlh

| SAMPLE              |                | DEC. & VT  |          |
|---------------------|----------------|------------|----------|
| date                | Jun 19 2010    | dn         | H1       |
| solvent             | CDC13          | dof        | 0        |
| file                | /export/home/~ | dm         | nnn      |
| userid/data/ui400/~ | dmm            |            | c        |
| kalyanid/dk-9-43-6~ | dmf            |            | 200      |
| .5h.fid             | dpwr           |            | 20       |
| ACQUISITION         |                | PROCESSING |          |
| sfrq                | 399.741        | lb         | 0.30     |
| tn                  | H1             | wtfile     |          |
| at                  | 4.096          | proc       | ft       |
| np                  | 65536          | fn         | not used |
| sw                  | 8000.0         | math       | f        |
| fb                  | 4000           |            |          |
| bs                  | 16             | werr       |          |
| tpwr                | 61             | wexp       |          |
| pw                  | 5.8            | wbs        |          |
| dl                  | 0              | wnt        |          |
| tof                 | -425.7         | DISPLAY    |          |
| nt                  | 1              | sp         | -199.9   |
| ct                  | 1              | wp         | 4397.0   |
| alock               | n              | vs         | 162      |
| gain                | not used       | sc         | 0        |
| FLAGS               |                | wc         | 250      |
| il                  | n              | hzmm       | 17.59    |
| in                  | n              | is         | 9440.16  |
| dp                  | y              | rfl        | 5322.5   |
| hs                  | nn             | rfp        | 2902.1   |
|                     |                | th         | 20       |
|                     |                | ins        | 1.000    |
|                     |                | nm         | ph       |

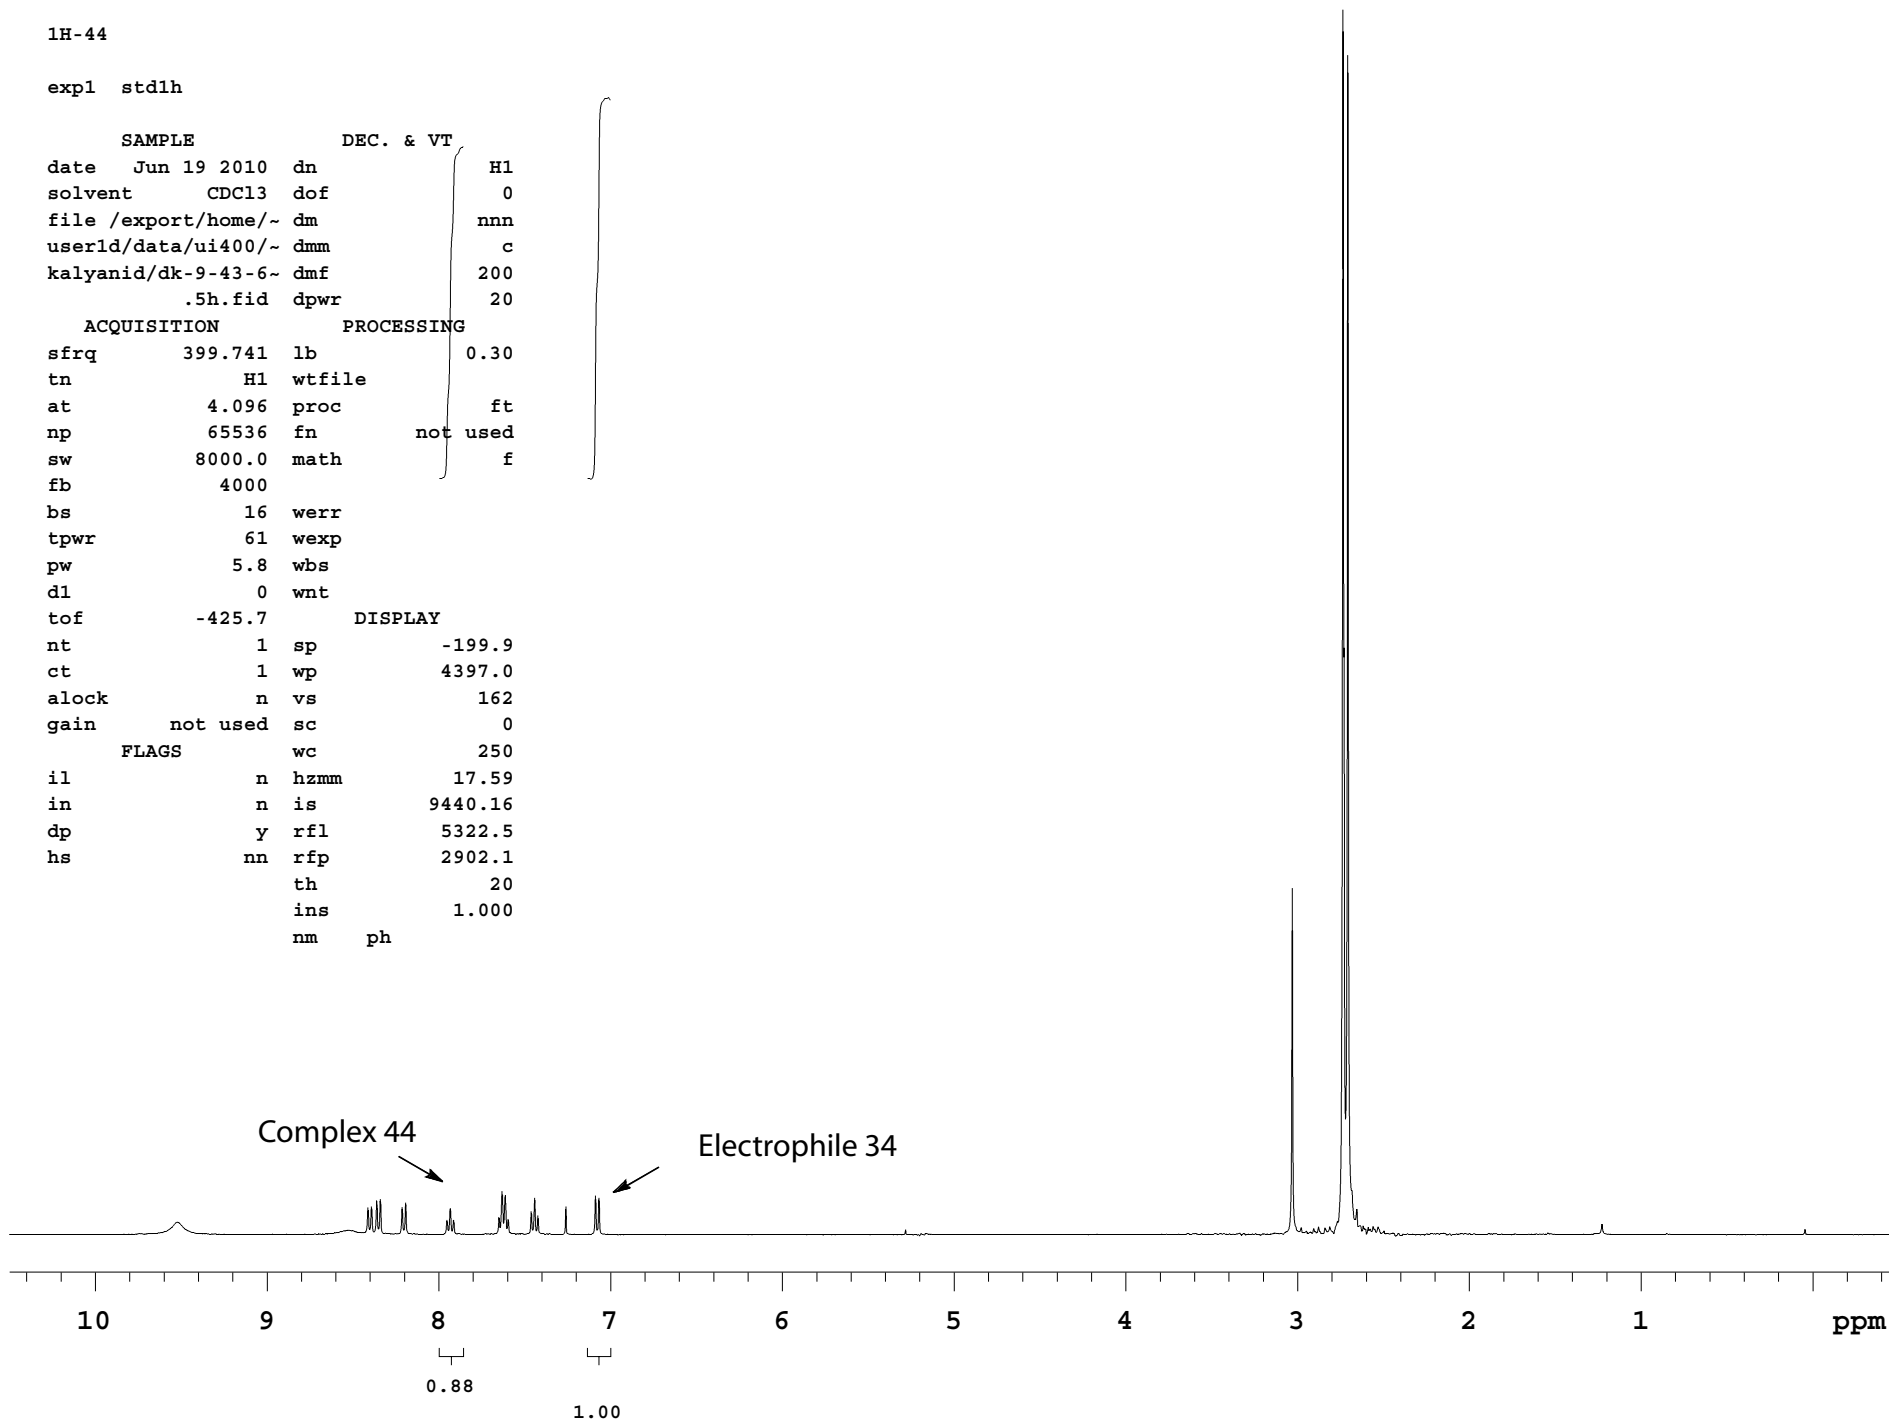



31P-44

exp1 s2pul

SAMPLE DEC. & VT  
date Jun 19 2010 dfrq 399.740  
solvent CDCl3 dn H1  
file /export/home/~ dpwr 49  
userid/data/ui400/~ dof -1092.3  
kalyanid/dk-9-43-3~ dm nny  
h-P31-negative50.f~ dmm w  
id dmf 24691

ACQUISITION dseq  
sfrq 161.833 dres 1.0  
tn P31 homo n  
at 0.819 temp -50.0

np 55680 DEC2  
sw 33984.7 dfrq2 undefined  
fb 19000 dn2 undefined  
bs 16 dpwr2 undefined  
tpwr 63 dof2 undefined  
pw 6.4 dm2 undefined  
dl 1.000 dmm2 undefined  
tof 14919.8 dmf2 undefined  
nt 1000 dseq2 undefined  
ct 1000 dres2 undefined  
alock n homo2 undefined

gain not used PROCESSING  
FLAGS lb 3.00  
il n wtfile  
in n proc ft  
dp y fn not used  
hs nn math f

DISPLAY  
sp -1683.3 werr  
wp 33983.7 wexp  
vs 162 wbs  
sc 0 wnt  
wc 250  
hzmm 5.18  
is 354.40  
rfl 1684.4  
rfp 0  
th 20  
ins 100.000

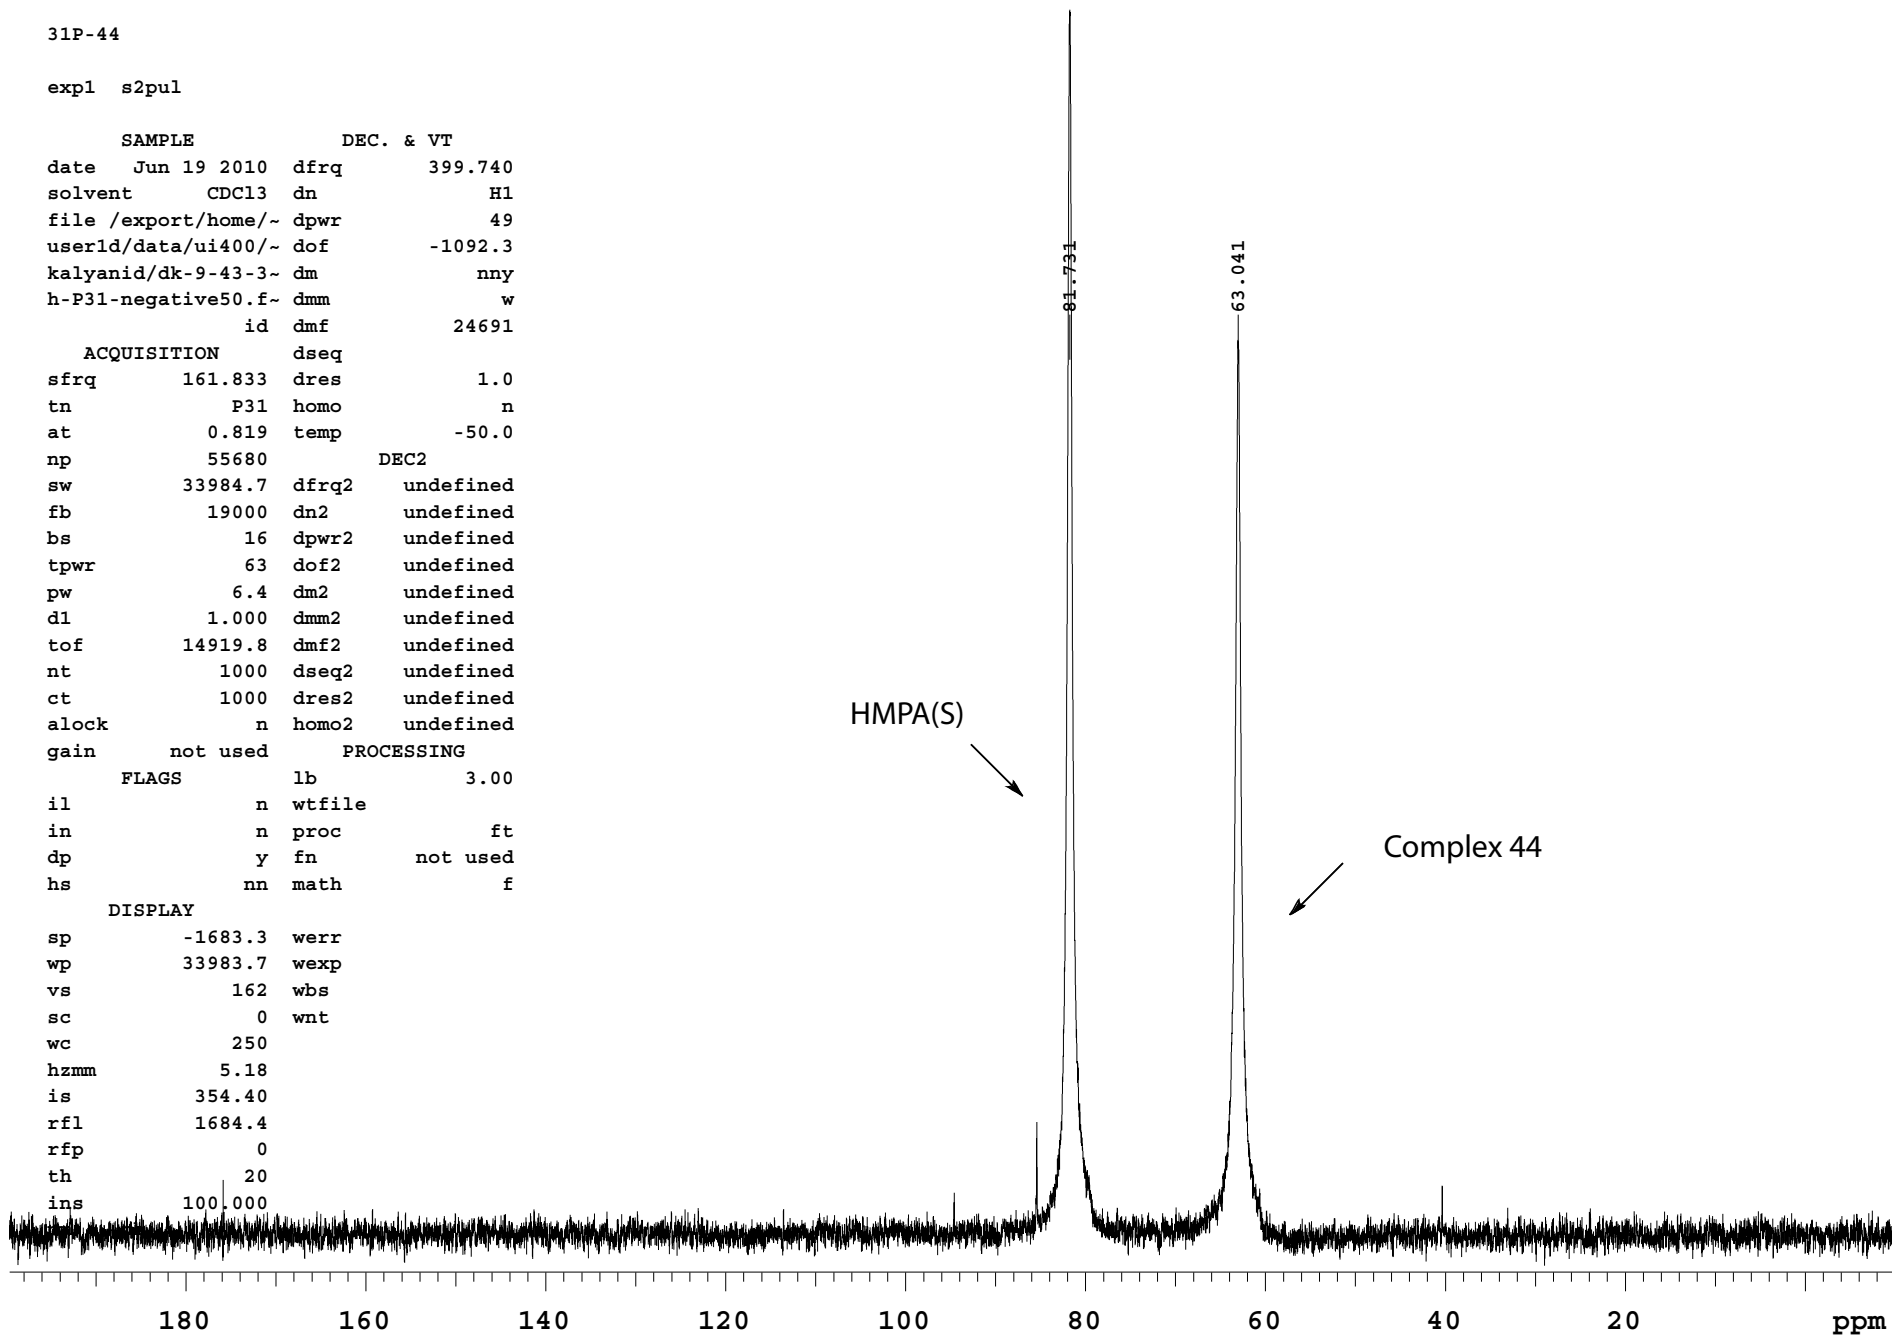

77Se-44

expl s2pul

```
SAMPLE          DEC. & VT
date   Jun 19 2010  dfrq      599.764
solvent   CDCl3   dn         H1
file /export/home/~ dpwr      46
data/ui600/Denmark~ dof     -1005.0
/kalyaniid/dk-9-43-- dm       nny
          Se77-5h.fid dmm      g
ACQUISITION    dmf       17100
sfrq      114.452  dseq
tn         Se77   dres      1.0
at         1.235  homo      n
np         493980 PROCESSING
sw         200000.0 lb       3.00
fb         110000 wtfile
bs         16     proc      ft
tpwr       63     fn       not used
pw         7.5   math      f
dl         0
tof        37814.0 werr
nt         50000  wexp
ct         5869  wbs
alock      n     wnt
gain       60

FLAGS
il         n
in         n
dp         Y
hs         nn

DISPLAY
sp        -31313.9
wp        199999.2
vs         667
sc         0
wc         250
hzmm      800.00
is         500.00
rfl       84182.7
rfp       52868.1
th         17
ins       100.000
ai        ph
```

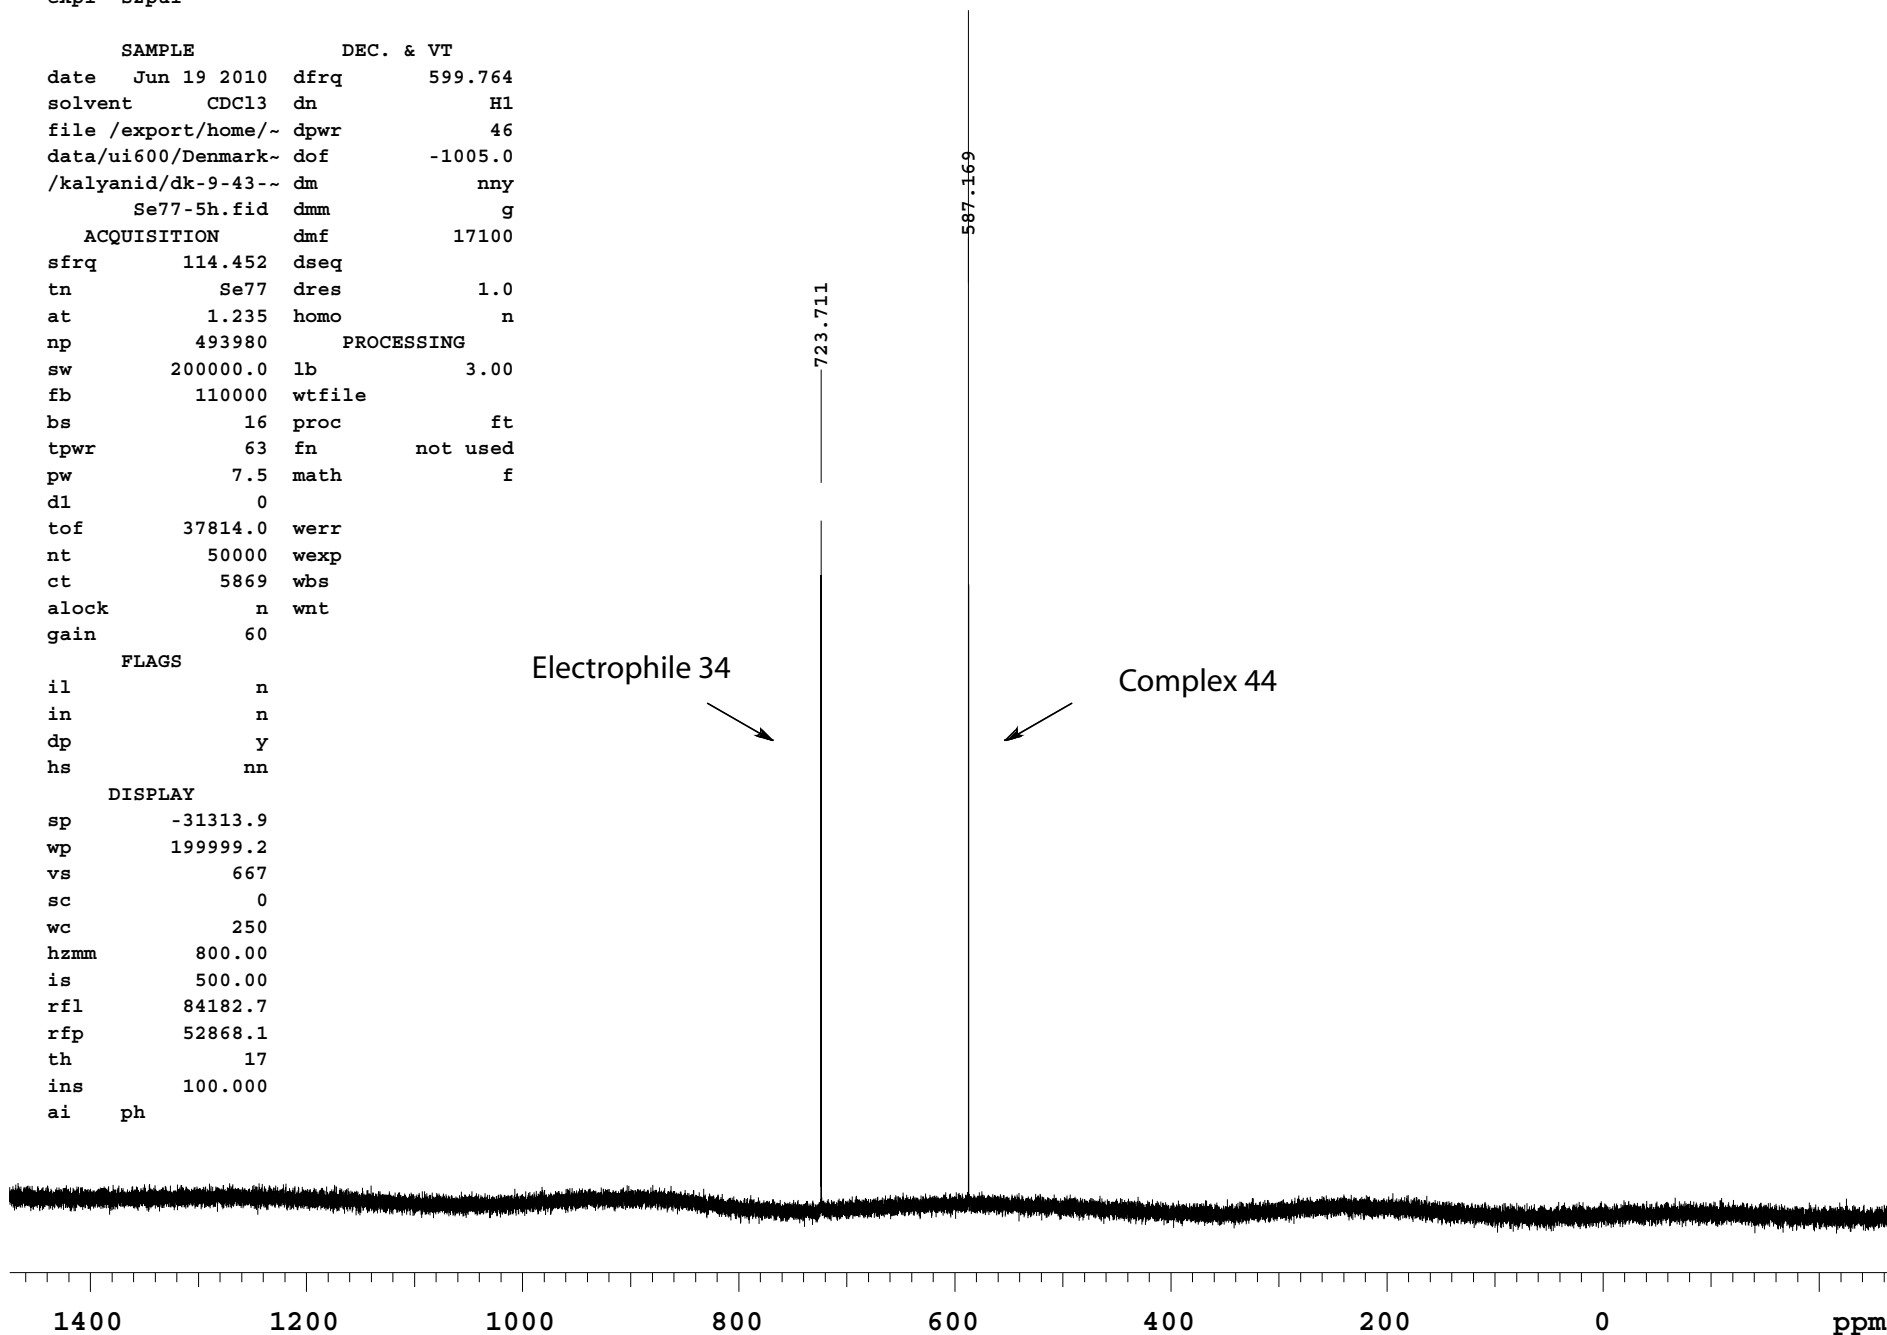

1H-45

expl std1h

| SAMPLE              |                | DEC. & VT  |          |
|---------------------|----------------|------------|----------|
| date                | Jun 22 2010    | dn         | H1       |
| solvent             | CDCl3          | dof        | 0        |
| file                | /export/home/~ | dm         | nnn      |
| data/ui400/Denmark~ | dmm            |            | c        |
| /kalyaniid/dk-9-46~ | dmf            |            | 200      |
| 2.5h-afterelectrop~ | dpwr           |            | 20       |
| hile.fid            |                | PROCESSING |          |
| ACQUISITION         | lb             |            | 0.30     |
| sfrq                | 399.741        | wtfile     |          |
| tn                  | H1             | proc       | ft       |
| at                  | 4.096          | fn         | not used |
| np                  | 65536          | math       | f        |
| sw                  | 8000.0         |            |          |
| fb                  | 4000           | werr       |          |
| bs                  | 16             | wexp       |          |
| tpwr                | 61             | wbs        |          |
| pw                  | 5.8            | wnt        |          |
| d1                  | 0              | DISPLAY    |          |
| tof                 | -425.7         | sp         | -199.9   |
| nt                  | 1              | wp         | 4397.0   |
| ct                  | 1              | vs         | 162      |
| alock               | n              | sc         | 0        |
| gain                | not used       | wc         | 250      |
| FLAGS               |                | hzmm       | 17.59    |
| il                  | n              | is         | 5147.89  |
| in                  | n              | rfl        | 2426.7   |
| dp                  | y              | rfp        | 0        |
| hs                  | nn             | th         | 20       |
|                     |                | ins        | 1.000    |
|                     |                | nm         | ph       |

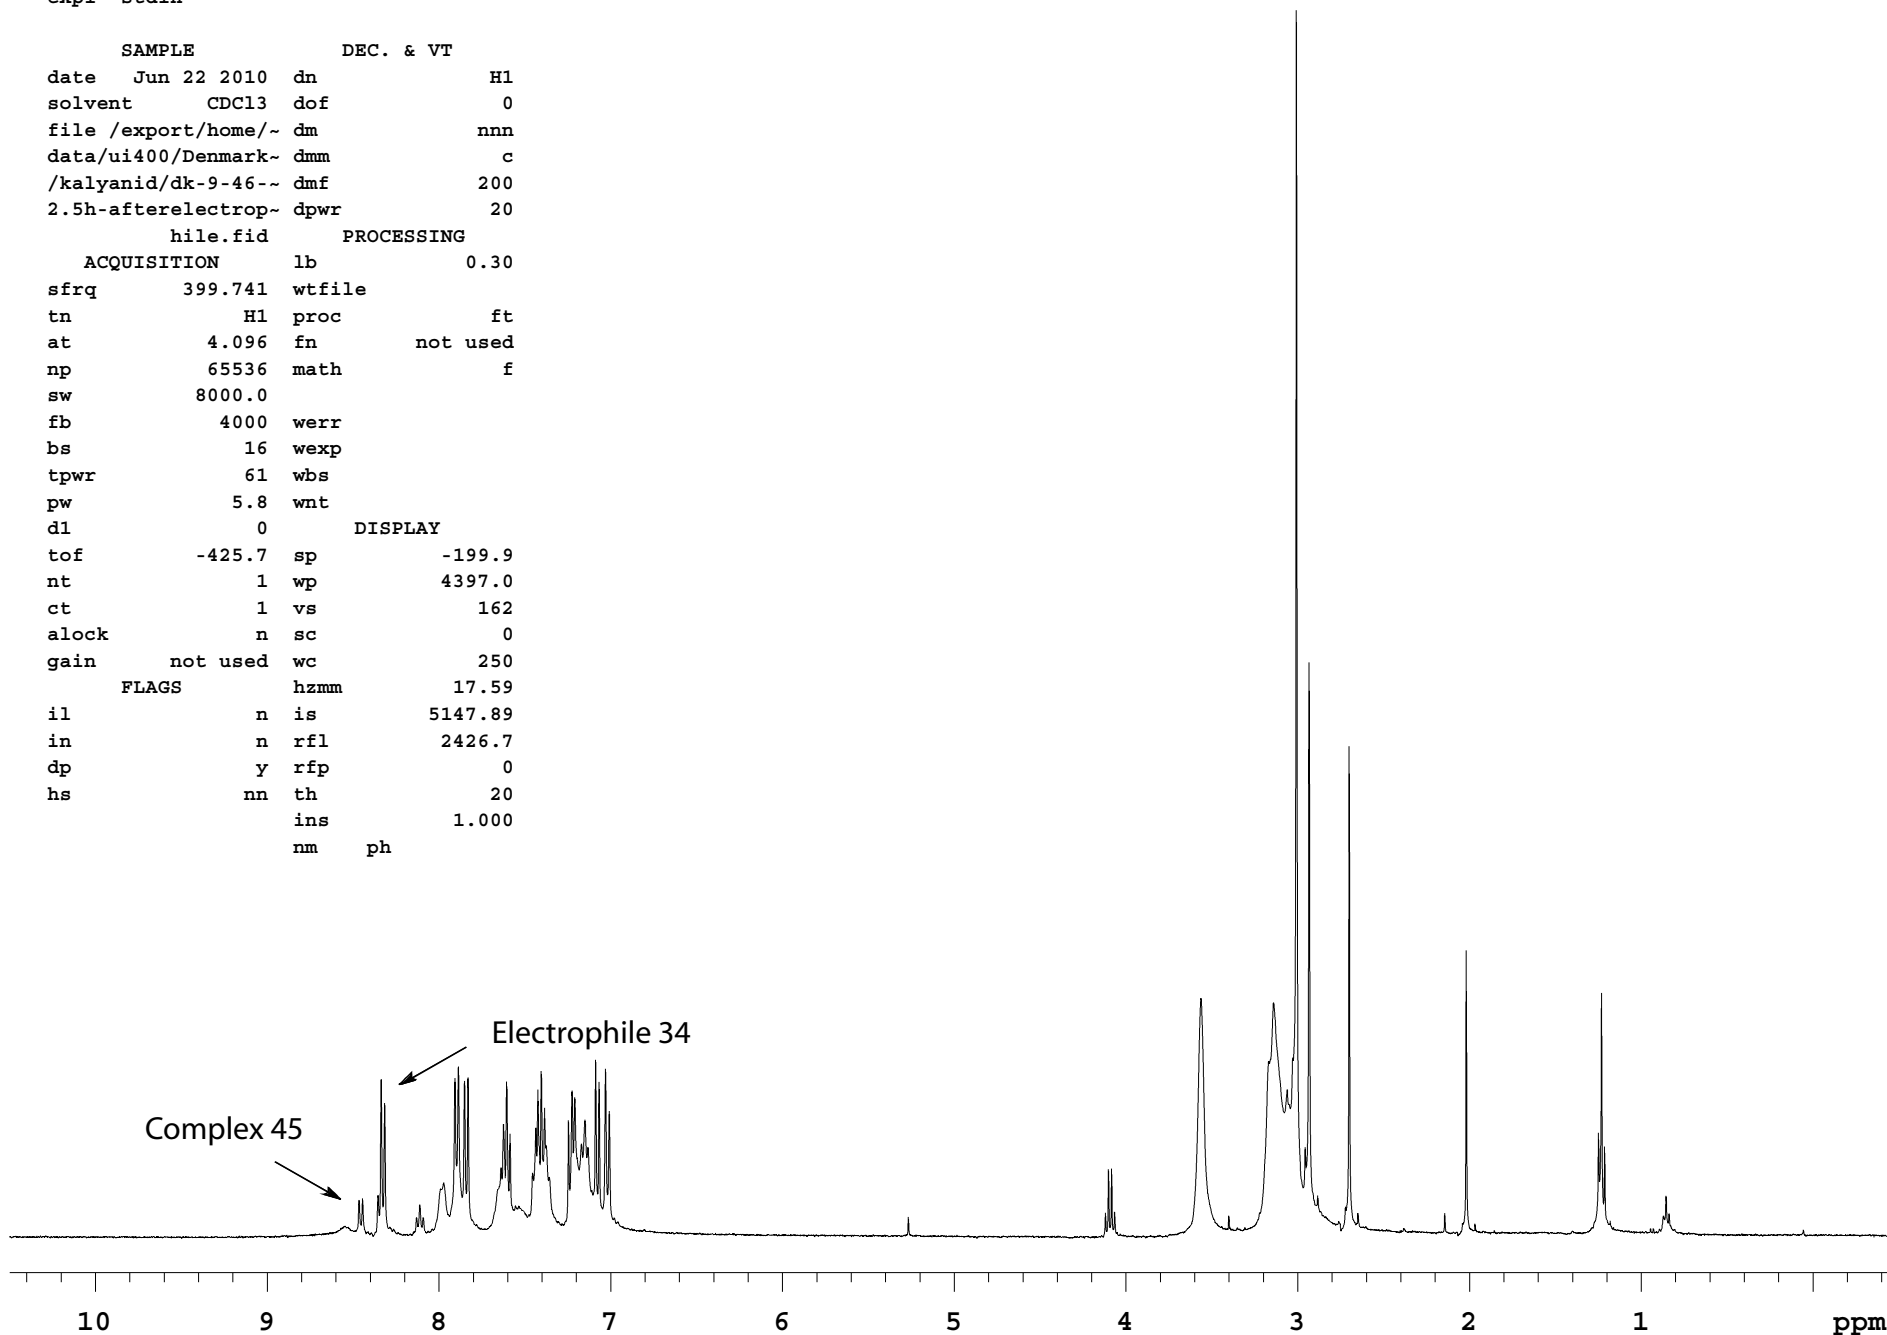

31P-45

exp1 s2pul

SAMPLE DEC. & VT  
date Jun 22 2010 dfrq 399.740  
solvent CDC13 dn H1  
file /export/home/~ dpwr 49  
data/ui400/Denmark~ dof -1092.3  
/kalyanid/dk-9-46~ dm nny  
afterelectrophilea~ dmm w  
ddition-1h-negativ~ dmf 24691

e43.fid dseq  
ACQUISITION dres 1.0  
sfrq 161.833 homo n  
tn P31 PROCESSING  
at 0.819 lb 3.00  
np 53022 wtfile  
sw 32362.5 proc ft  
fb 18000 fn not used  
bs 16 math f

tpwr 63  
pw 6.4 werr  
dl 1.000 wexp  
tof 15728.9 wbs  
nt 500 wnt  
ct 48  
alock n  
gain not used

FLAGS  
il n  
in n  
dp y  
hs nn

DISPLAY  
sp 1.5  
wp 32361.5  
vs 162  
sc 0  
wc 250  
hzmm 129.45  
is 354.40  
rfl -0.5  
rfp 0  
th 16  
ins 1.000

nm ph

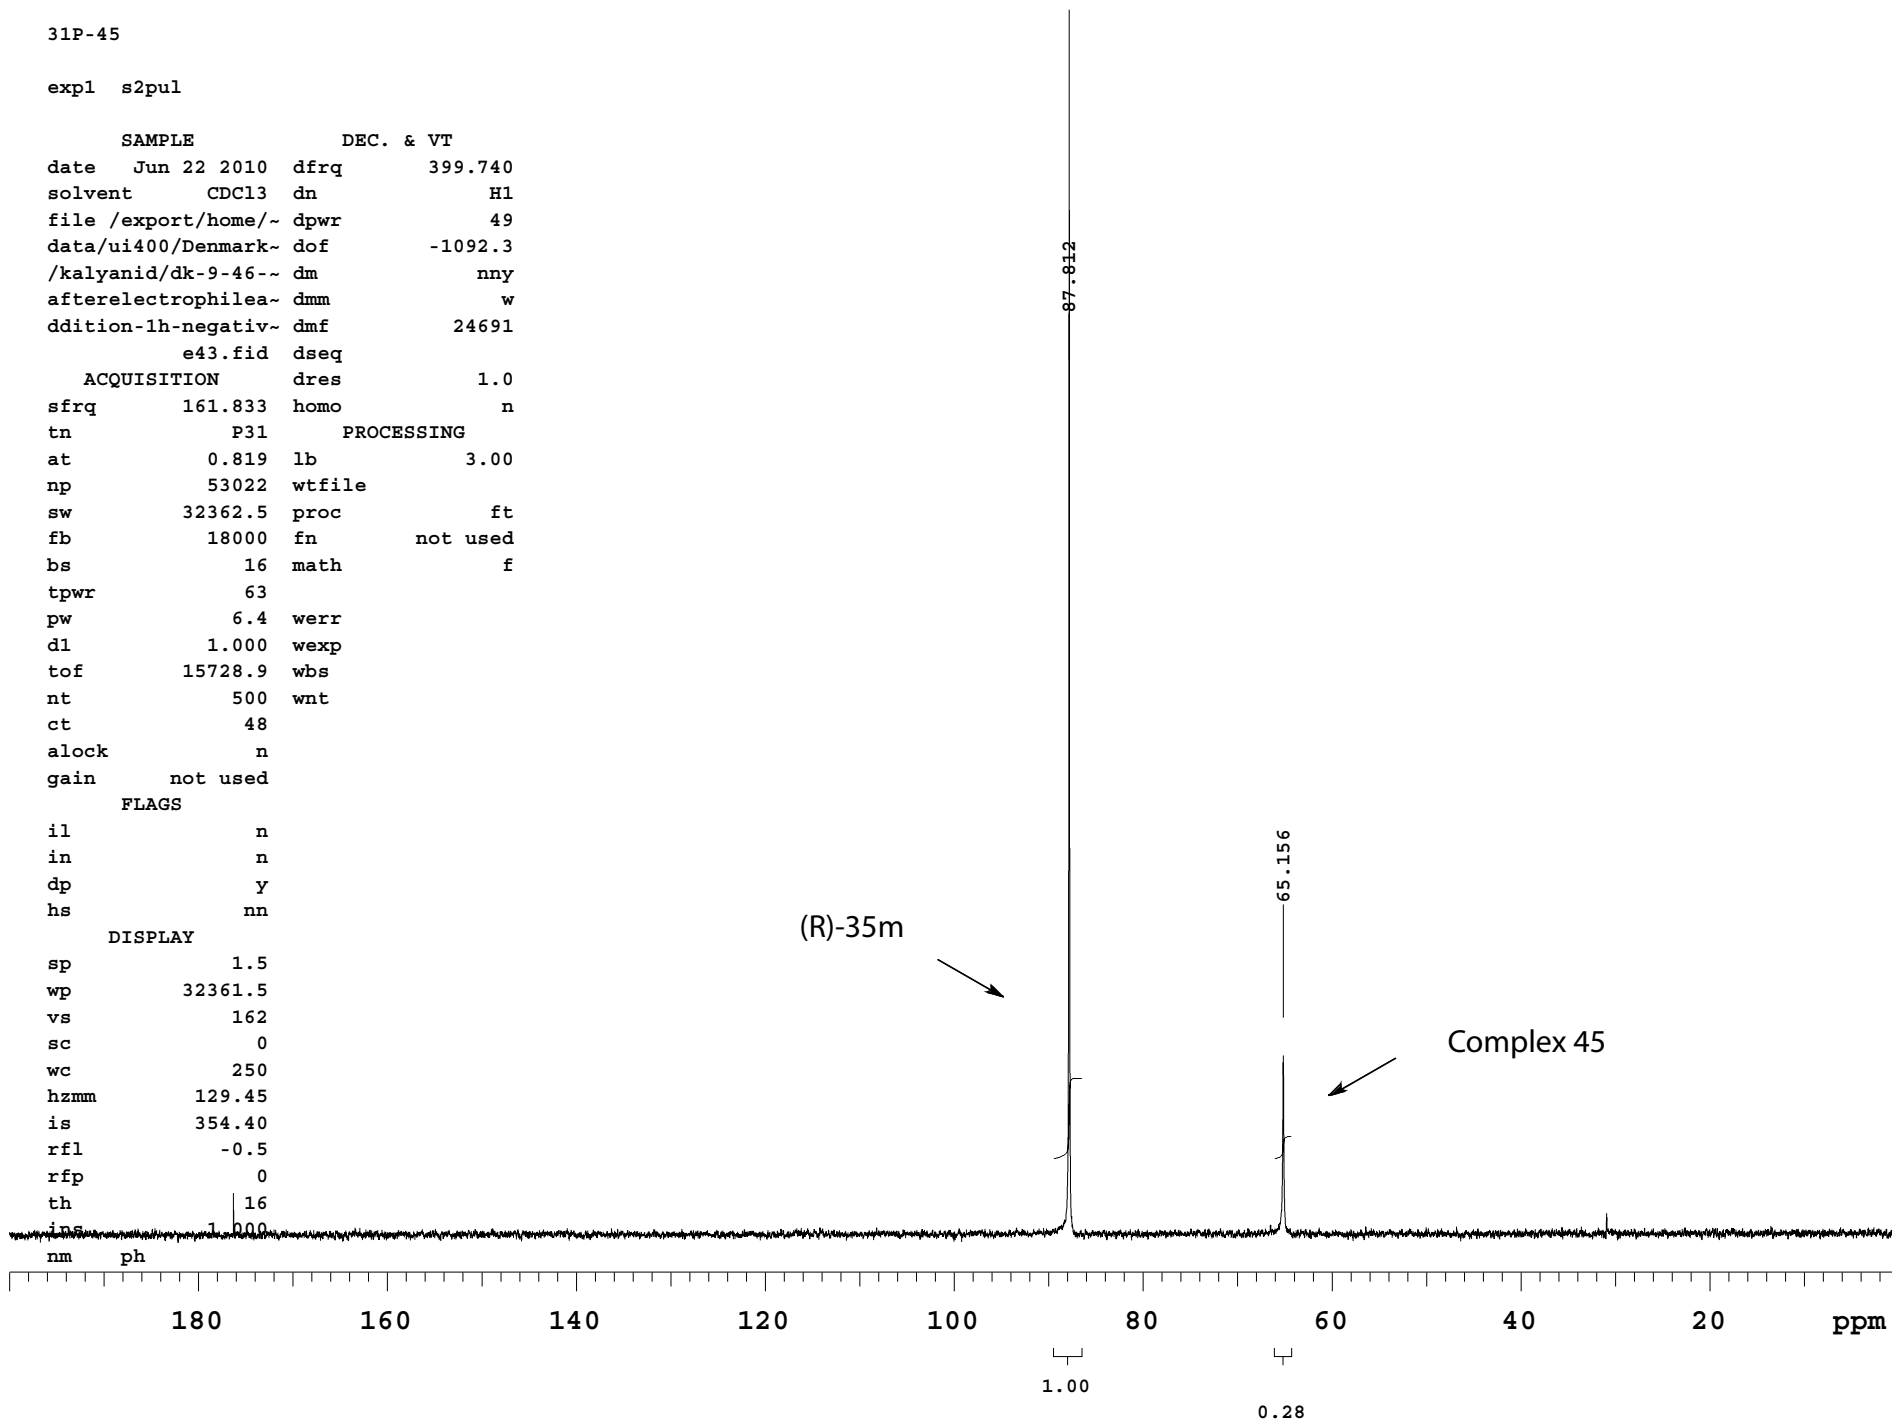

expl s2pul

| SAMPLE              |                | DEC. & VT |         |
|---------------------|----------------|-----------|---------|
| date                | Jun 23 2010    | dfrq      | 599.764 |
| solvent             | CDCl3          | dn        | H1      |
| file                | /export/home/~ | dpwr      | 46      |
| userid/data/ui600/~ |                | dof       | -1005.0 |
| kalyanid/dk-9-46-a~ |                | dm        | nny     |
| fterelectrophile-2~ |                | dmm       | g       |
| 0h.fid              |                | dmf       | 17100   |

| ACQUISITION |          | dseq  |       |
|-------------|----------|-------|-------|
| sfrq        | 114.452  | dres  | 1.0   |
| tn          | Se77     | homo  | n     |
| at          | 1.235    | DEC2  |       |
| np          | 493980   | dfrq2 | 0     |
| sw          | 200000.0 | dn2   |       |
| fb          | 110000   | dpwr2 | 1     |
| bs          | 16       | dof2  | 0     |
| tpwr        | 63       | dm2   | n     |
| pw          | 7.5      | dmm2  | c     |
| d1          | 0        | dmf2  | 10000 |
| tof         | 37814.0  | dseq2 |       |
| nt          | 50000    | dres2 | 1.0   |
| ct          | 7287     | homo2 | n     |

| PROCESSING |            |
|------------|------------|
| alock      | n          |
| gain       | 60 lb 3.00 |

| FLAGS |    | wtfile |          |
|-------|----|--------|----------|
| il    | n  | proc   | ft       |
| in    | n  | fn     | not used |
| dp    | y  | math   | f        |
| hs    | nn |        |          |

| DISPLAY |          | werr |  |
|---------|----------|------|--|
| sp      | -649.1   | wexp |  |
| wp      | 138330.8 | wbs  |  |
| vs      | 1190     | wnt  |  |
| sc      | 0        |      |  |
| wc      | 250      |      |  |
| hzmm    | 553.32   |      |  |
| is      | 500.00   |      |  |
| rfl     | 84182.7  |      |  |
| rfp     | 52868.1  |      |  |
| th      | 34       |      |  |
| ins     | 100.000  |      |  |

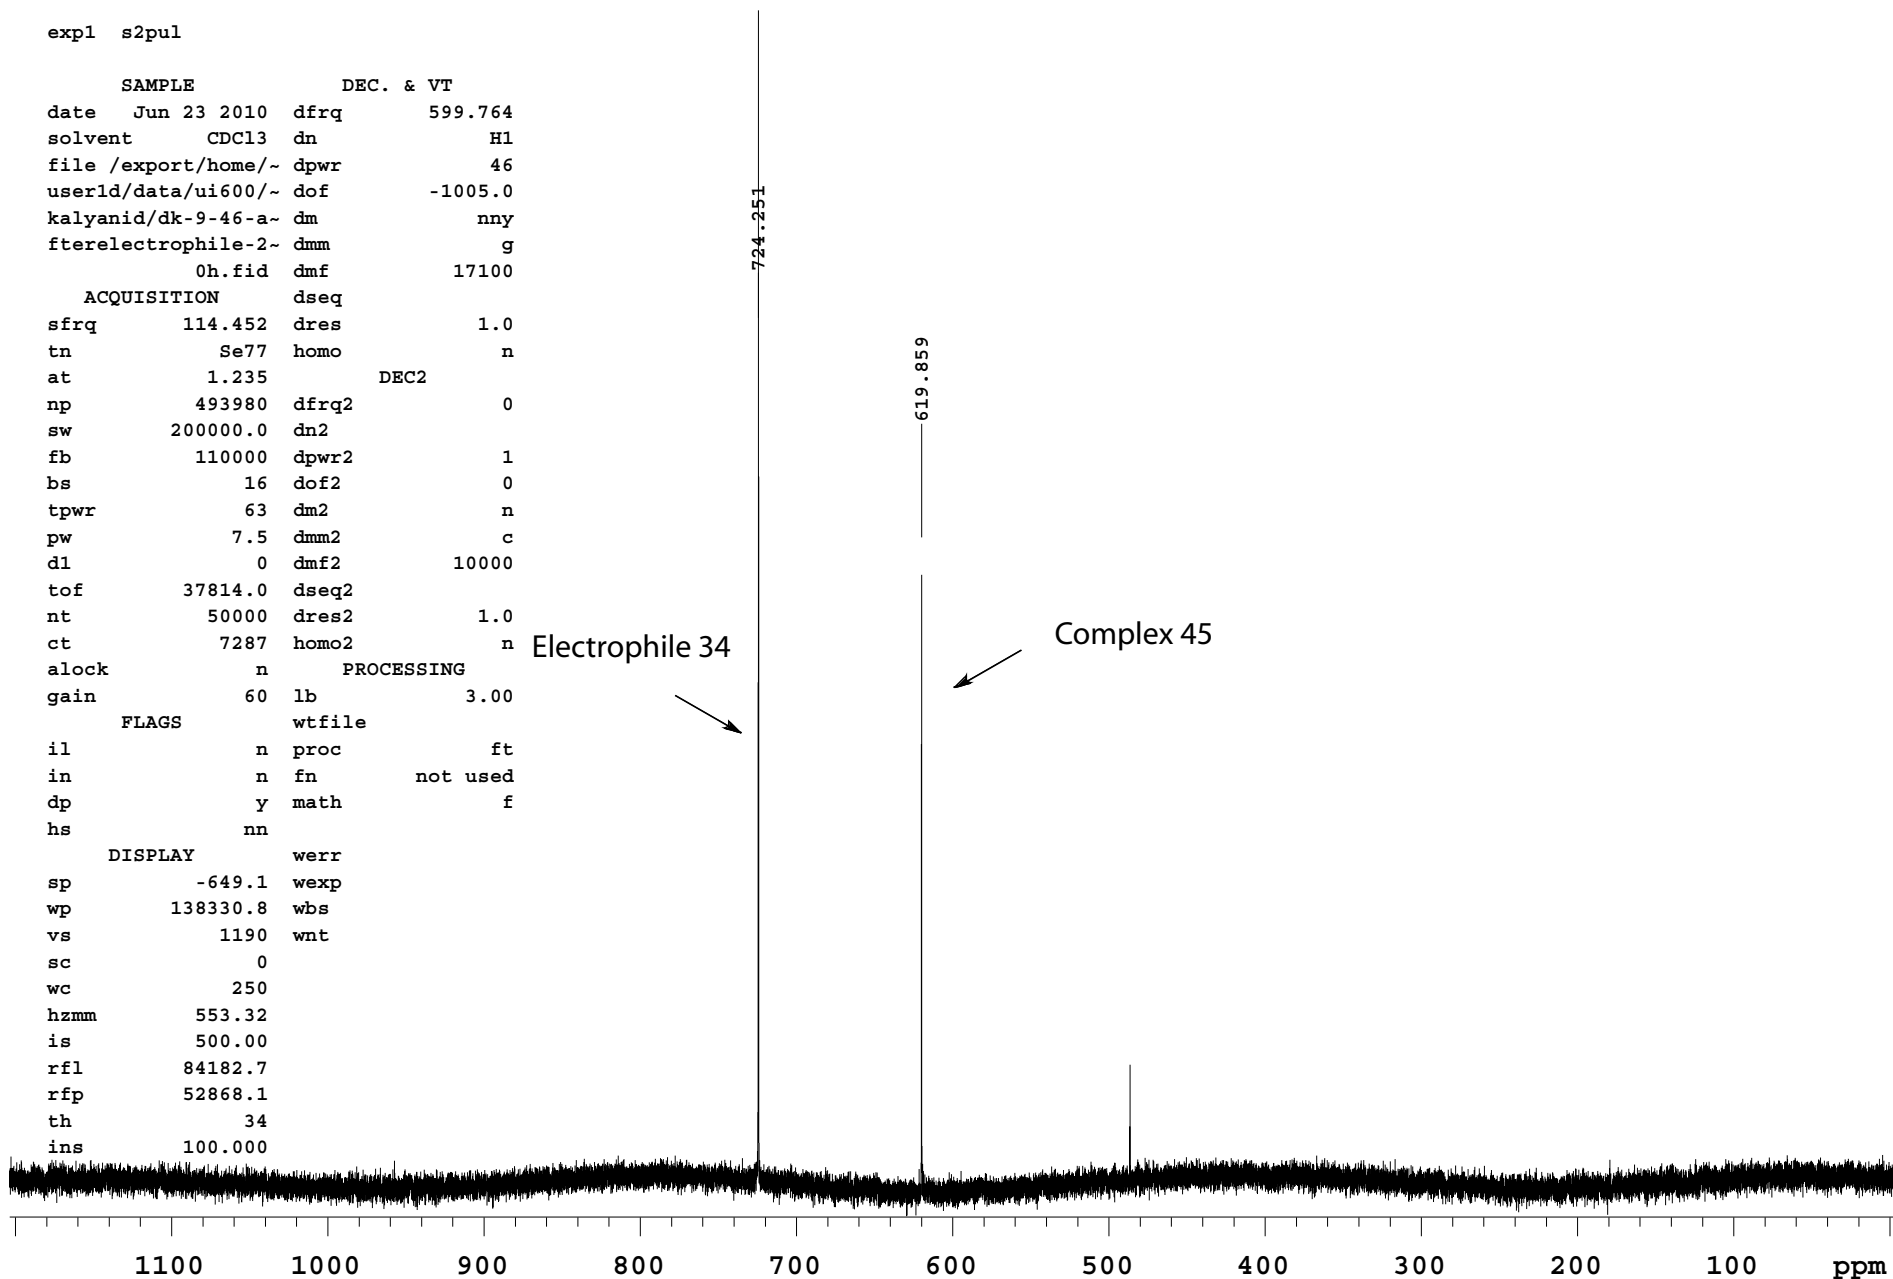

Supplement: NIHMS247258-supplement-1_si_001.pdf [file NIHMS247258-supplement-1_si_001.pdf]
